# Supplementary material for: Palladium-catalyzed radical cascade cyanoalkylsulfonylation/cyclization of 3-arylethynyl-[1,1′-biphenyl]-2-carbonitriles with cyclobutanone oxime esters and DABSO
Source: Royal Society of Chemistry journal article supplement (doi:10.1039/d1cc06825c), 2022-01-01

# Supporting Information

## **Palladium-catalyzed radical cascade cyanoalkylsulfonation/ cyclization of 3-arylethynyl-[1,1'-biphenyl]-2-carbonitriles with cyclobutanone oxime esters and DABSO**

Nengneng Zhou,\* Qiankun Xu, Ziqin Xia, Kaimo Kuang, Sixin Wu, Wenping Li, and Man Zhang

*Key Laboratory of Functionalized Molecular Solids, Ministry of Education, Anhui Key Laboratory of Molecule-Based Materials, College of Chemistry and Materials Science, Anhui Normal University, Wuhu, Anhui 241000, China.*

E-mail: [zhounn@ahnu.edu.cn](mailto:zhounn@ahnu.edu.cn)

### **Table of Contents**

|                                                                                                          |    |
|----------------------------------------------------------------------------------------------------------|----|
| General information.....                                                                                 | 2  |
| Table 1 Optimization of reaction conditions .....                                                        | 2  |
| General procedures for synthesis of cyanoalkylsulfonated<br>cyclopenta[gh]phenanthridines <b>3</b> ..... | 3  |
| Experimental procedure for gram-up reaction.....                                                         | 4  |
| General Procedure for the Synthesis of <b>4</b> .....                                                    | 4  |
| Trapping experiment with TEMPO.....                                                                      | 4  |
| Trapping experiment with BHT.....                                                                        | 5  |
| Trapping experiment with 1,1-diphenylethene.....                                                         | 5  |
| Reference.....                                                                                           | 6  |
| Characterization data of compounds.....                                                                  | 7  |
| Copies of <sup>1</sup> H NMR, <sup>13</sup> C NMR, <sup>19</sup> F NMR.....                              | 17 |

### General Information:

All reactions were carried out under Ar atmosphere unless otherwise noted. All catalysts and solvents were obtained from commercial suppliers. Reactions were monitored by TLC on silica gel plates (GF254), and the analytical thin-layer chromatography (TLC) was performed on pre-coated, glass-backed silica gel plates.  $^1\text{H}$  NMR,  $^{13}\text{C}$  NMR and  $^{19}\text{F}$  NMR spectra were recorded on a Bruker Ascend 400 MHz NMR spectrometer at room temperature. Chemical shifts ( $\delta$ ) are reported in ppm downfield from tetramethylsilane. Chemical shifts ( $\delta$ ) are given in ppm relative to  $\text{CDCl}_3$  (7.26 ppm for  $^1\text{H}$  and 77 ppm for  $^{13}\text{C}$ ) to internal TMS ( $\delta = 0$  ppm) as internal standard. High-resolution mass spectra (HRMS) were obtained using ESI-TOF, APCI-TOF in positive mode. All substrates **1** and cycloketone oxime esters **2** were synthesized according to the literature.<sup>1,2</sup>

**Table 1 Optimization of reaction conditions**<sup>a</sup>

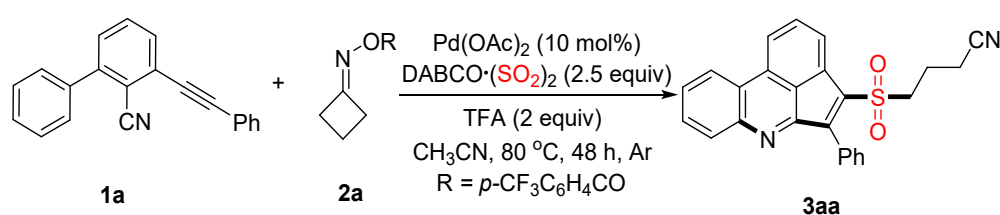

| entry | Variation from the standard conditions                                                         | yield(%) <sup>b</sup> |
|-------|------------------------------------------------------------------------------------------------|-----------------------|
| 1     | None                                                                                           | 73                    |
| 2     | Pd(PPh <sub>3</sub> ) <sub>2</sub> Cl <sub>2</sub> instead of Pd(OAc) <sub>2</sub>             | 57                    |
| 3     | Pd(PPh <sub>3</sub> ) <sub>4</sub> instead of Pd(OAc) <sub>2</sub>                             | 9                     |
| 4     | Pd(TFA) <sub>2</sub> instead of Pd(OAc) <sub>2</sub>                                           | 53                    |
| 5     | CuCl/CuI/Cu(OAc) <sub>2</sub> instead of Pd(OAc) <sub>2</sub>                                  | 0/0/0                 |
| 6     | FeCl <sub>2</sub> /FeCl <sub>3</sub> instead of Pd(OAc) <sub>2</sub>                           | 33/trace              |
| 7     | NiCl <sub>2</sub> ·glyme instead of Pd(OAc) <sub>2</sub>                                       | 43%                   |
| 8     | Na <sub>2</sub> S <sub>2</sub> O <sub>5</sub> instead of DABCO·(SO <sub>2</sub> ) <sub>2</sub> | trace                 |
| 9     | K <sub>2</sub> S <sub>2</sub> O <sub>5</sub> instead of DABCO·(SO <sub>2</sub> ) <sub>2</sub>  | trace                 |
| 10    | DCM instead of CH <sub>3</sub> CN                                                              | 40                    |
| 11    | CH <sub>3</sub> NO <sub>2</sub> instead of CH <sub>3</sub> CN                                  | trace                 |
| 12    | Toluene instead of CH <sub>3</sub> CN                                                          | 0                     |
| 13    | 1,4-dioxane instead of CH <sub>3</sub> CN                                                      | 0                     |
| 14    | DMF instead of CH <sub>3</sub> CN                                                              | 0                     |
| 15    | DMSO instead of CH <sub>3</sub> CN                                                             | 0                     |
| 16    | at 60 °C                                                                                       | 0                     |
| 17    | at 100 °C                                                                                      | 40                    |
| 18    | <b>2a</b> (2.0 equiv)                                                                          | 53                    |
| 19    | <b>2a</b> (3.0 equiv)                                                                          | 57                    |
| 20    | DABCO·(SO <sub>2</sub> ) <sub>2</sub> (2.0 equiv)                                              | 59                    |
| 21    | DABCO·(SO <sub>2</sub> ) <sub>2</sub> (3.0 equiv)                                              | 62                    |

|    |                                                                                     |       |
|----|-------------------------------------------------------------------------------------|-------|
| 22 | Pd(OAc) <sub>2</sub> (5 mol%)                                                       | 58    |
| 23 | Pd(OAc) <sub>2</sub> (20 mol%)                                                      | 61    |
| 24 | TFA (1.0 equiv)                                                                     | 55    |
| 25 | TFA (3.0 equiv)                                                                     | 51    |
| 26 | H <sup>+</sup> P <sup>t</sup> Bu <sub>3</sub> ·BF <sub>4</sub> was used as a ligand | 43    |
| 27 | BINAP was used as a ligand                                                          | 57    |
| 28 | Xantphos was used as a ligand                                                       | 13    |
| 29 | DPPF was used as a ligand                                                           | 18    |
| 30 | PPh <sub>3</sub> was used as a ligand                                               | 16    |
| 31 | PCy <sub>3</sub> was used as a ligand                                               | 54    |
| 32 | DPPE was used as a ligand                                                           | 62    |
| 33 | K <sub>2</sub> CO <sub>3</sub> instead of TFA                                       | trace |
| 34 | Cs <sub>2</sub> CO <sub>3</sub> instead of TFA                                      | trace |
| 35 | AcONa instead of TFA                                                                | trace |
| 36 | HAc instead of TFA                                                                  | 51    |
| 37 | H <sub>2</sub> SO <sub>4</sub> instead of TFA                                       | 57    |
| 38 | Without TFA                                                                         | 45    |
| 39 | 24 h                                                                                | 49    |
| 40 | 72 h                                                                                | 65    |

<sup>a</sup> Reaction conditions: **1a** (0.1 mmol), **2a** (0.25 mmol, 2.5 equiv.), DABCO·(SO<sub>2</sub>)<sub>2</sub> (0.25 mmol, 2.5 equiv.), TFA (2.0 equiv), Pd(OAc)<sub>2</sub> (10 mol%) and CH<sub>3</sub>CN (1 mL) at 80 °C under an argon atmosphere for 48 h. <sup>b</sup> Yield of the isolated product.

### General procedures for synthesis of cyanoalkylsulfonylated cyclopenta[*gh*]phenanthridines **3**

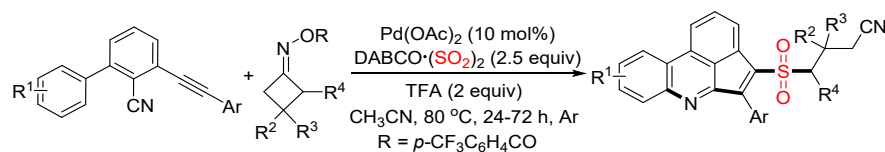

An oven-dried Schlenk tube (10 mL) was equipped with a magnetic stir bar, **1** (0.1 mmol), cyclobutanone *O*-acyl oximes **2** (1.5 equiv, 0.15 mmol), DABCO·(SO<sub>2</sub>)<sub>2</sub> (0.25 mmol, 2.5 equiv.), TFA (2.0 equiv), Pd(OAc)<sub>2</sub> (10 mol%). The flask was evacuated and backfilled with Ar for 3 times. 1 mL CH<sub>3</sub>CN was added with syringe under Ar. The tube was then sealed and the mixture was stirred at 80 °C for 24-72 h. After the reaction was finished, the organic solvent was removed under the reduced pressure. The residue was purified by column chromatography (DCM) to afford the desired products **3**.

## Experimental procedure for gram-up reaction

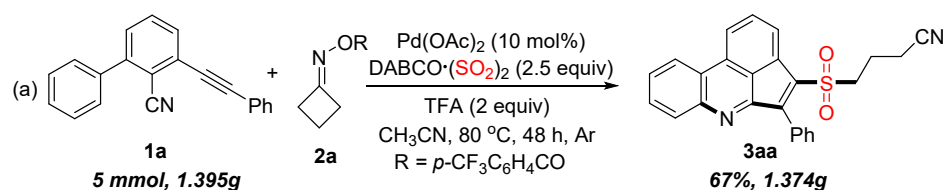

An oven-dried Schlenk tube (100 mL) was equipped with a magnetic stir bar, **1a** (5 mmol), cyclobutanone *O*-acyl oximes **2a** (7.5 mmol, 1.5 equiv.), DABCO·(SO<sub>2</sub>)<sub>2</sub> (12.5 mmol, 2.5 equiv.), TFA (2.0 equiv), Pd(OAc)<sub>2</sub> (10 mol%). The flask was evacuated and backfilled with Ar for 3 times. 50 mL CH<sub>3</sub>CN was added with syringe under Ar. The tube was then sealed and the mixture was stirred at 80 °C for 48 h. After the reaction was finished, the organic solvent was removed under the reduced pressure. The residue was purified by column chromatography to afford the desired product **3aa** in 67%.

## General Procedure for the Synthesis of 4

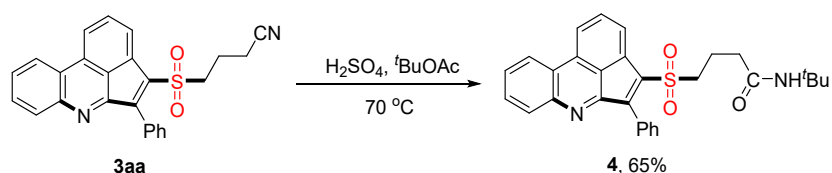

To a 10 mL Schlenk were sequentially added **3aa** (82.0 mg, 0.2 mmol, 1.0 equiv.), tert-butyl acetate (2 mL) and conc. H<sub>2</sub>SO<sub>4</sub> (4 drops). The reaction mixture was stirred at 70 °C overnight. After cooling to room temperature, the reaction mixture was quenched with NaHCO<sub>3</sub> aq. and extracted with DCM (15 mL × 3). The combined organic layer was washed with brine (20 mL), dried over anhydrous Na<sub>2</sub>SO<sub>4</sub>, filtered, and concentrated in vacuum. The residue was purified by silica gel chromatography (DCM/MeOH=20:1, v/v) to afford the desired product **4** in 65% yield (62.9 mg) as a yellow solid. <sup>1</sup>H NMR (400 MHz, CDCl<sub>3</sub>): δ = 8.61-8.58 (m, 1H), 8.43-8.37 (m, 2H), 8.25 (d, *J* = 7.2 Hz, 1H), 7.94-7.90 (m, 2H), 7.89-7.85 (m, 1H), 7.83-7.79 (m, 2H), 7.61-7.55 (m, 3H), 5.29 (s, 1H), 3.10 (t, *J* = 7.2 Hz, 2H), 2.15 (t, *J* = 7.2 Hz, 2H), 2.06-2.00 (m, 2H), 1.26 (s, 9H) ppm; <sup>13</sup>C NMR (101 MHz, CDCl<sub>3</sub>): δ 170.3, 160.9, 148.4, 148.3, 139.8, 135.3, 133.0, 132.5, 131.3, 130.1, 129.7, 129.2, 129.042, 128.964, 128.1, 125.3, 124.6, 123.5, 123.0, 119.6, 54.6, 51.3, 35.0, 28.7, 18.8 ppm. ESI-HRMS: *m/z* Calcd for C<sub>36</sub>H<sub>34</sub>N<sub>2</sub>O<sub>3</sub>S+H<sup>+</sup>: 485.1893, found 485.1896.

## Trapping experiment with TEMPO

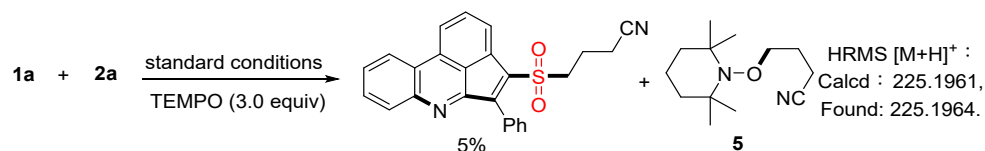

An oven-dried Schlenk tube (10 mL) was equipped with a magnetic stir bar, **1** (0.1 mmol), cyclobutanone *O*-acyl oximes **2** (1.5 equiv, 0.15 mmol), DABCO·(SO<sub>2</sub>)<sub>2</sub> (0.25 mmol, 2.5 equiv.), TFA (2.0 equiv), Pd(OAc)<sub>2</sub> (10 mol%). The flask was evacuated and backfilled with Ar for 3 times. 1 mL CH<sub>3</sub>CN was added with syringe under Ar. The tube was then sealed and the mixture was stirred at 80 °C for 48 h. However, product **3aa** was obtained in 5% yield, the intermediate **6** was formed, suggesting that this transformation proceeds through a radical pathway.

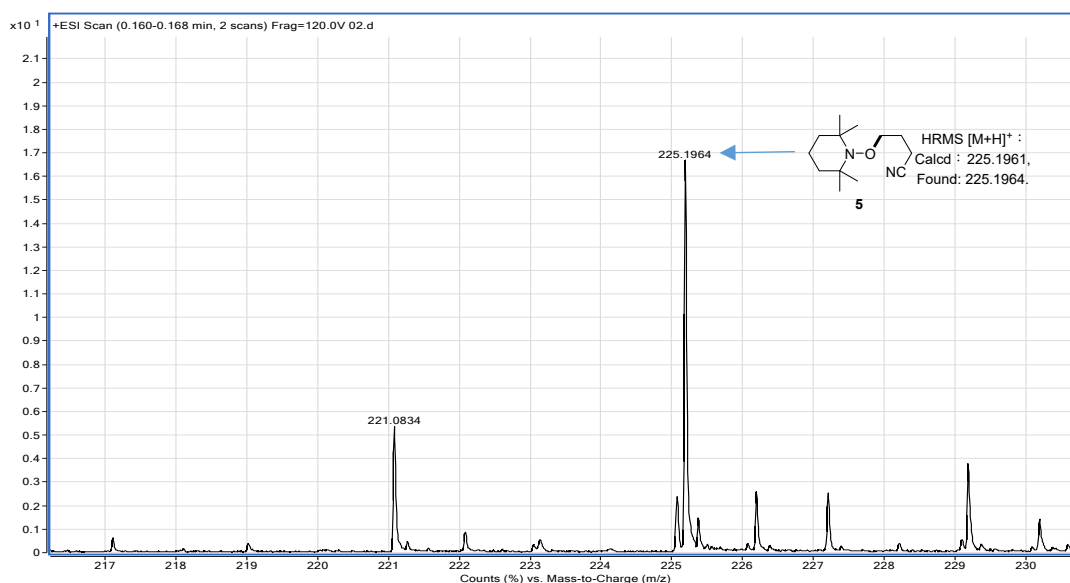

### Trapping experiment with BHT

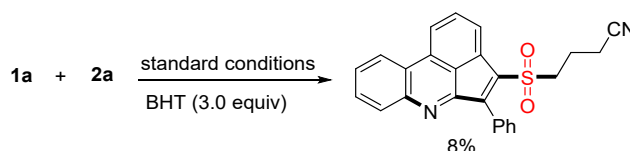

An oven-dried Schlenk tube (10 mL) was equipped with a magnetic stir bar, **1** (0.1 mmol), cyclobutanone *O*-acyl oximes **2** (1.5 equiv, 0.15 mmol), DABCO·(SO<sub>2</sub>)<sub>2</sub> (0.25 mmol, 2.5 equiv.), TFA (2.0 equiv), Pd(OAc)<sub>2</sub> (10 mol%). The flask was evacuated and backfilled with Ar for 3 times. 1 mL CH<sub>3</sub>CN was added with syringe under Ar. The tube was then sealed and the mixture was stirred at 80 °C for 48 h. However, product **3aa** was obtained in 8% yield

### Trapping experiment with 1,1-diphenylethene

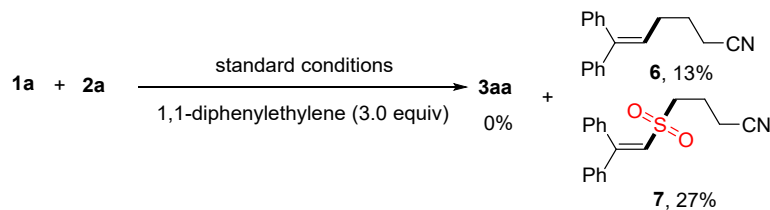

An oven-dried Schlenk tube (10 mL) was equipped with a magnetic stir bar, **1** (0.2 mmol), cyclobutanone *O*-acyl oximes **2** (1.5 equiv, 0.30 mmol), DABCO·(SO<sub>2</sub>)<sub>2</sub> (0.50 mmol, 2.5 equiv.), TFA (2.0 equiv), Pd(OAc)<sub>2</sub> (10 mol%). The flask was evacuated and backfilled with Ar for 3 times. 1 mL MeCN was added with syringe under Ar. The tube was then sealed and the mixture was stirred at 80 °C for 48 h. After the reaction finished, the residue was concentrated in vacuo, then purified by column chromatography to afford **6** (6.4 mg, 13%) and **7** (16.8 mg, 27%). *6,6*-diphenylhex-5-enitrile (**6**). Yellow oil; (7.4 mg, 15%); <sup>1</sup>H NMR (400 MHz, CDCl<sub>3</sub>): δ = 7.40-7.36 (m, 2H), , 7.33 (d, *J* = 6.8 Hz, 1H), 7.27-7.20 (m, 5H), 7.17-7.14 (m, 2H), 6.01 (t, *J* = 7.2 Hz, 2H), 2.32-2.23 (m, 4H), 1.83-1.76 (m, 2H) ppm; <sup>13</sup>C NMR (101 MHz, CDCl<sub>3</sub>): δ 143.8, 142.1, 139.6, 129.6, 128.3, 128.1, 127.2, 127.2, 127.1, 126.6, 119.5, 28.7, 25.7, 16.6 ppm. 4-((2,2-diphenylvinyl)sulfonyl)butanenitrile (**7**). Yellow oil; (19.9 mg, 32%); <sup>1</sup>H NMR (400 MHz, CDCl<sub>3</sub>):

$\delta$  = 7.49-7.42 (m, 4H), 7.39-7.36 (m, 4H), 7.29-7.27 (m, 2H), 6.79 (s, 1H), 2.86 (t,  $J$  = 7.2 Hz, 2H), 2.47 (t,  $J$  = 7.2 Hz, 2H), 2.12-2.05 (m, 2H) ppm;  $^{13}\text{C}$  NMR (101 MHz,  $\text{CDCl}_3$ ):  $\delta$  156.7, 138.7, 135.3, 130.7, 129.7, 129.6, 128.7, 128.324, 128.304, 125.6, 118.1, 52.7, 18.7, 16.1 ppm.

### Reference:

- [1] (a) N. Zhou, M. Wu, K. Kuang, S. Wu, M. Zhang, *Adv. Synth. Catal.* 2020, **362**, 5391-5397. (b) N. Zhou, M. Wu, M. Zhang, X. Zhou, W. Zhou, *Org. Biomol. Chem.*, 2020, **18**, 1733-1737.
- [2] (a) T. Nishimura, Y. Nishiguchi, Y. Maeda, S. Uemura, *J. Org. Chem.* 2004, **69**, 5342. (b) Y.-R. Gu, X.-H. Duan, L. Yang, L.-N. Guo, *Org. Lett.* 2017, **19**, 5908.
- B. Zhao, H. Tan, C. Chen, N. Jiao, N. and Z. Shi, *Chin. J. Chem.* 2018, **36**, 995.

## Characterization data of compounds

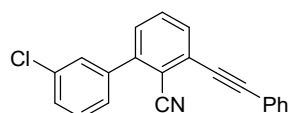

4-((5-phenylcyclopenta[gh]phenanthridin-4-yl)sulfonyl)butanenitrile (**1s**). White solid; melting point: 110-111 °C;  $R_f$  = 0.5 (ethyl acetate / hexane = 1:20);  $^1\text{H}$  NMR (400 MHz,  $\text{CDCl}_3$ ):  $\delta$  = 7.66-7.64 (m, 1H), 7.64-7.62 (m, 2H), 7.61-7.58 (m, 1H), 7.53-7.52 (m, 1H), 7.49-7.47 (m, 1H), 7.46-7.41 (m, 3H), 7.40-7.38 (m, 3H) ppm;  $^{13}\text{C}$  NMR (101 MHz,  $\text{CDCl}_3$ ):  $\delta$  144.6, 139.6, 134.6, 132.2, 132.1, 131.1, 130.0, 129.3, 129.2, 129.0, 128.8, 128.6, 128.4, 127.0, 122.0, 116.8, 114.1, 96.3, 85.9 ppm. ESI-HRMS:  $m/z$  Calcd for  $\text{C}_{21}\text{H}_{12}\text{ClN}+\text{NH}_4^+$ : 331.0997, found 331.0997.

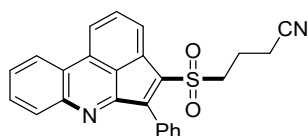

4-((5-phenylcyclopenta[gh]phenanthridin-4-yl)sulfonyl)butanenitrile (**3aa**). Yellow solid; (29.9 mg, 73%); melting point: 188-189 °C;  $R_f$  = 0.5 (DCM);  $^1\text{H}$  NMR (400 MHz,  $\text{CDCl}_3$ ):  $\delta$  = 8.57-8.54 (m, 1H), 8.40-8.35 (m, 2H), 8.23 (d,  $J$  = 7.2 Hz, 1H), 7.94-7.91 (m, 2H), 7.87-7.83 (m, 1H), 7.82-7.77 (m, 2H), 7.63-7.58 (m, 3H), 3.13 (t,  $J$  = 7.2 Hz, 2H), 2.42 (t,  $J$  = 7.2 Hz, 2H), 2.10-2.03 (m, 2H) ppm;  $^{13}\text{C}$  NMR (101 MHz,  $\text{CDCl}_3$ ):  $\delta$  160.5, 148.5, 148.3, 139.3, 134.9, 133.0, 132.5, 131.2, 130.4, 129.4, 129.2, 129.106, 129.078, 128.3, 125.3, 124.5, 123.6, 123.0, 119.4, 118.0, 53.6, 18.9, 16.0 ppm. ESI-HRMS:  $m/z$  Calcd for  $\text{C}_{25}\text{H}_{18}\text{N}_2\text{O}_2\text{S}+\text{H}^+$ : 411.1162, found 411.1170.

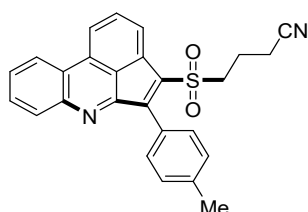

4-((5-(*p*-tolyl)cyclopenta[gh]phenanthridin-4-yl)sulfonyl)butanenitrile (**3ba**). Yellow solid; (25.9 mg, 61%); melting point: 219-220 °C;  $R_f$  = 0.4 (DCM);  $^1\text{H}$  NMR (400 MHz,  $\text{CDCl}_3$ ):  $\delta$  = 8.59-8.56 (m, 1H), 8.41-8.38 (m, 2H), 8.23 (d,  $J$  = 7.2 Hz, 1H), 7.88-7.78 (m, 5H), 7.41 (d,  $J$  = 7.6 Hz, 2H), 3.15 (t,  $J$  = 7.2 Hz, 2H), 2.49 (s, 3H), 2.44 (t,  $J$  = 7.2 Hz, 2H), 2.11-2.04 (m, 2H) ppm;  $^{13}\text{C}$  NMR (101 MHz,  $\text{CDCl}_3$ ):  $\delta$  160.7, 148.7, 148.3, 140.9, 138.6, 135.1, 133.0, 132.5, 131.3, 129.239, 129.163, 129.1, 129.0, 126.5, 125.2, 124.6, 123.5, 123.0, 119.6, 118.0, 53.5, 21.6, 19.0, 16.1 ppm. ESI-HRMS:  $m/z$  Calcd for  $\text{C}_{26}\text{H}_{20}\text{N}_2\text{O}_2\text{S}+\text{H}^+$ : 425.1318, found 425.1317.

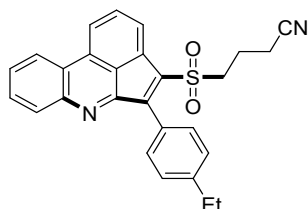

4-((5-(4-ethylphenyl)cyclopenta[gh]phenanthridin-4-yl)sulfonyl)butanenitrile (**3ca**). Yellow solid; (37.7 mg, 86%); melting point: 228-229 °C;  $R_f$  = 0.6 (DCM);  $^1\text{H}$  NMR (400 MHz,  $\text{CDCl}_3$ ):  $\delta$  = 8.57-8.54 (m, 1H), 8.38 (d,  $J$  = 7.6 Hz, 2H), 8.22 (d,  $J$  = 7.2 Hz, 1H), 7.90-7.77 (m, 5H), 7.44 (d,  $J$  = 8.0 Hz, 2H), 3.14 (t,  $J$  = 7.2 Hz, 2H), 2.79 (q,  $J$  = 15.2 Hz,  $J$  = 7.6 Hz, 2H), 2.42 (t,  $J$  = 7.2 Hz, 2H),

2.11-2.03 (m, 2H), 1.34 (t,  $J = 7.6$  Hz, 3H) ppm;  $^{13}\text{C}$  NMR (101 MHz,  $\text{CDCl}_3$ ):  $\delta$  160.7, 148.7, 148.3, 147.0, 138.6, 135.1, 133.0, 132.5, 131.4, 129.2, 129.1, 129.0, 128.0, 126.7, 125.2, 124.5, 123.4, 123.0, 119.5, 118.0, 53.5, 28.9, 19.0, 16.1, 15.1 ppm. ESI-HRMS:  $m/z$  Calcd for  $\text{C}_{27}\text{H}_{22}\text{N}_2\text{O}_2\text{S}+\text{H}^+$ : 439.1475, found 439.1473.

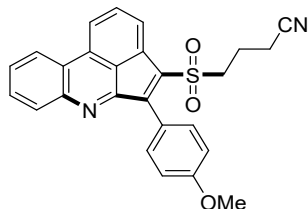

4-((5-(4-methoxyphenyl)cyclopenta[gh]phenanthridin-4-yl)sulfonyl)butanenitrile (**3da**). Yellow solid; (28.2 mg, 64%); melting point: 209-210 °C;  $R_f = 0.3$  (DCM);  $^1\text{H}$  NMR (400 MHz,  $\text{CDCl}_3$ ):  $\delta = 8.57$ -8.55 (m, 1H), 8.38 (m, 2H), 8.21 (d,  $J = 7.2$  Hz, 1H), 7.99 (d,  $J = 7.6$  Hz, 2H), 7.86-7.79 (m, 3H), 7.13 (d,  $J = 8.4$  Hz, 2H), 3.93 (s, 3H), 3.17 (t,  $J = 7.2$  Hz, 2H), 2.45 (t,  $J = 7.2$  Hz, 2H), 2.11-2.04 (m, 2H) ppm;  $^{13}\text{C}$  NMR (101 MHz,  $\text{CDCl}_3$ ):  $\delta$  161.6, 160.7, 148.246, 148.211, 137.6, 135.3, 133.3, 133.0, 132.4, 129.2, 129.1, 129.0, 125.0, 124.5, 123.2, 123.0, 121.6, 120.0, 118.0, 114.0, 55.4, 53.3, 19.0, 16.1 ppm. ESI-HRMS:  $m/z$  Calcd for  $\text{C}_{26}\text{H}_{20}\text{N}_2\text{O}_3\text{S}+\text{H}^+$ : 441.1267, found 441.1264.

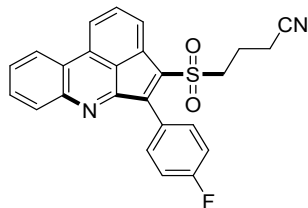

4-((5-(4-fluorophenyl)cyclopenta[gh]phenanthridin-4-yl)sulfonyl)butanenitrile (**3ea**). Yellow solid; (23.1 mg, 54%); melting point: 205-206 °C;  $R_f = 0.5$  (DCM);  $^1\text{H}$  NMR (400 MHz,  $\text{CDCl}_3$ ):  $\delta = 8.60$ -8.58 (m, 1H), 8.43 (d,  $J = 8.8$  Hz, 1H), 8.40-8.38 (m, 1H), 8.23 (d,  $J = 7.2$  Hz, 1H), 8.00-7.96 (m, 2H), 7.90-7.86 (m, 1H), 7.85-7.80 (m, 2H), 7.32-7.26 (m, 2H), 3.19 (t,  $J = 7.2$  Hz, 2H), 2.48 (t,  $J = 7.2$  Hz, 2H), 2.14-2.07 (m, 2H) ppm;  $^{13}\text{C}$  NMR (101 MHz,  $\text{CDCl}_3$ ):  $\delta$  164.1 (d,  $J = 252.8$  Hz), 160.3, 148.3, 147.7, 139.0, 134.8, 133.7, 133.6, 133.1, 132.5, 129.3, 129.2, 125.312, 125.264, 124.6, 123.8, 123.1, 119.4, 117.9, 115.6 (d,  $J = 21.8$  Hz), 53.8, 18.9, 16.1 ppm;  $^{19}\text{F}$  NMR (376 MHz,  $\text{CDCl}_3$ ):  $\delta$  -109.4 ppm. ESI-HRMS:  $m/z$  Calcd for  $\text{C}_{25}\text{H}_{17}\text{FN}_2\text{O}_2\text{S}+\text{H}^+$ : 429.1068, found 429.1066.

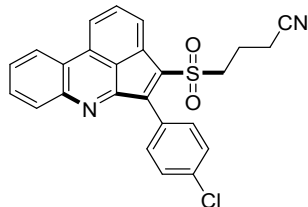

4-((5-phenylcyclopenta[gh]phenanthridin-4-yl)sulfonyl)butanenitrile (**3fa**). Yellow solid; (19.1 mg, 43%); melting point: 215-216 °C;  $R_f = 0.5$  (DCM);  $^1\text{H}$  NMR (400 MHz,  $\text{CDCl}_3$ ):  $\delta = 8.62$ -8.58 (m, 1H), 8.45 (d,  $J = 8.4$  Hz, 1H), 8.41-8.37 (m, 1H), 8.24 (d,  $J = 7.2$  Hz, 1H), 7.93-7.81 (m, 5H), 7.60-7.57 (m, 2H), 3.20 (t,  $J = 7.2$  Hz, 2H), 2.49 (t,  $J = 7.2$  Hz, 2H), 2.16-2.08 (m, 2H) ppm;  $^{13}\text{C}$  NMR (101 MHz,  $\text{CDCl}_3$ ):  $\delta$  160.2, 148.4, 147.6, 139.4, 136.9, 134.8, 133.2, 132.9, 132.6, 129.4, 129.3, 128.7, 127.7, 125.4, 124.6, 124.0, 119.5, 117.9, 53.9, 18.9, 16.2 ppm. ESI-HRMS:  $m/z$  Calcd



for  $C_{25}H_{17}ClN_2O_2S+H^+$ : 445.0772, found 445.0775.

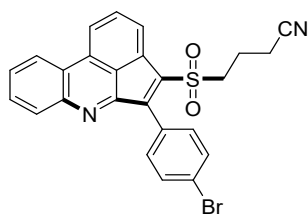

*4-((5-(4-bromophenyl)cyclopenta[gh]phenanthridin-4-yl)sulfonyl)butanenitrile (3ga)*. Yellow solid; (22.4 mg, 46%); melting point: 237-238 °C;  $R_f$  = 0.5 (DCM);  $^1H$  NMR (400 MHz,  $CDCl_3$ ):  $\delta$  = 8.62-8.59 (m, 1H), 8.45 (d,  $J$  = 8.0 Hz, 1H), 8.40-8.38 (m, 1H), 8.24 (d,  $J$  = 7.2 Hz, 1H), 7.91-7.81 (m, 5H), 7.76-7.73 (m, 2H), 3.21 (t,  $J$  = 7.2 Hz, 2H), 2.50 (t,  $J$  = 7.2 Hz, 2H), 2.16-2.09 (m, 2H) ppm;  $^{13}C$  NMR (101 MHz,  $CDCl_3$ ):  $\delta$  160.1, 148.4, 147.6, 139.3, 134.8, 133.1, 133.0, 132.5, 131.6, 129.4, 129.3, 128.2, 125.4, 125.3, 124.6, 123.9, 123.1, 119.5, 117.9, 53.9, 18.9, 16.1 ppm. ESI-HRMS:  $m/z$  Calcd for  $C_{25}H_{17}BrN_2O_2S+H^+$ : 489.0267, found 489.0260.

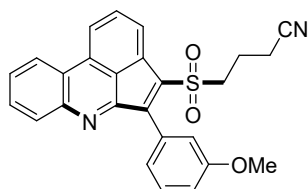

*4-((5-(3-methoxyphenyl)cyclopenta[gh]phenanthridin-4-yl)sulfonyl)butanenitrile (3ha)*. Yellow solid; (34.8 mg, 79%); melting point: 70-71 °C;  $R_f$  = 0.4 (DCM);  $^1H$  NMR (400 MHz,  $CDCl_3$ ):  $\delta$  = 8.58-8.56 (m, 1H), 8.42-8.38 (m, 2H), 8.26 (d,  $J$  = 7.2 Hz, 1H), 7.88-7.80 (m, 3H), 7.53-7.51 (m, 3H), 7.15-7.12 (m, 1H), 3.92 (s, 3H), 3.15 (t,  $J$  = 7.2 Hz, 2H), 2.44 (t,  $J$  = 7.2 Hz, 2H), 2.12-2.05 (m, 2H) ppm;  $^{13}C$  NMR (101 MHz,  $CDCl_3$ ):  $\delta$  160.4, 159.3, 148.3, 148.1, 139.4, 134.9, 133.0, 132.5, 130.6, 129.5, 129.2, 129.1, 125.5, 124.5, 123.7, 123.6, 123.0, 119.4, 117.9, 116.6, 116.5, 55.4, 53.4, 19.0, 16.1 ppm. ESI-HRMS:  $m/z$  Calcd for  $C_{26}H_{20}N_2O_3S+H^+$ : 441.1267, found 441.1272.

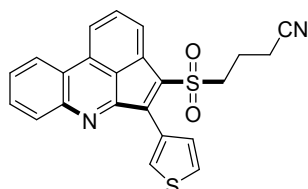

*4-((5-(thiophen-3-yl)cyclopenta[gh]phenanthridin-4-yl)sulfonyl)butanenitrile (3ia)*. Yellow solid; (21.2 mg, 51%); melting point: 75-76 °C;  $R_f$  = 0.5 (DCM);  $^1H$  NMR (400 MHz,  $CDCl_3$ ):  $\delta$  = 8.59-8.56 (m, 2H), 8.43-8.37 (m, 2H), 8.26 (d,  $J$  = 6.8 Hz, 1H), 8.08 (d,  $J$  = 4.8 Hz, 1H), 7.86-7.79 (m, 3H), 7.57-7.55 (m, 1H), 3.26 (t,  $J$  = 7.2 Hz, 2H), 2.50 (t,  $J$  = 7.2 Hz, 2H), 2.17-2.10 (m, 2H) ppm;  $^{13}C$  NMR (101 MHz,  $CDCl_3$ ):  $\delta$  160.4, 148.1, 142.3, 136.8, 135.5, 133.1, 132.4, 132.1, 130.4, 129.9, 129.2, 129.146, 129.098, 125.9, 125.4, 124.5, 123.3, 123.0, 119.5, 117.9, 52.9, 19.0, 16.1 ppm. ESI-HRMS:  $m/z$  Calcd for  $C_{23}H_{16}N_2O_2S_2+H^+$ : 417.0726, found 417.0726.

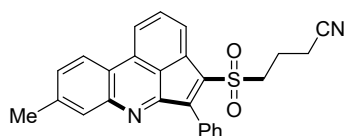

*4-((8-methyl-5-phenylcyclopenta[gh]phenanthridin-4-yl)sulfonyl)butanenitrile (3la)*. Yellow solid; (28.8 mg, 68%); melting point: 178-179 °C;  $R_f$  = 0.4 (DCM);  $^1H$  NMR (400 MHz,  $CDCl_3$ ):  $\delta$  = 8.43

(d,  $J = 8.4$  Hz, 1H), 8.35 (d,  $J = 8.4$  Hz, 1H), 8.19 (t,  $J = 7.2$  Hz, 2H), 7.93-7.90 (m, 2H), 7.83 (t,  $J = 7.6$  Hz, 1H), 7.63-7.58 (m, 4H), 3.13 (t,  $J = 7.2$  Hz, 2H), 2.61 (s, 3H), 2.42 (t,  $J = 7.2$  Hz, 2H), 2.10-2.03 (m, 2H) ppm;  $^{13}\text{C}$  NMR (101 MHz,  $\text{CDCl}_3$ ):  $\delta$  160.4, 148.6, 148.5, 139.5, 139.0, 134.9, 132.9, 132.0, 131.2, 130.9, 130.3, 129.5, 129.2, 128.3, 124.9, 123.5, 122.7, 122.2, 119.1, 117.9, 53.6, 21.5, 18.9, 16.0 ppm. ESI-HRMS:  $m/z$  Calcd for  $\text{C}_{26}\text{H}_{20}\text{N}_2\text{O}_2\text{S}+\text{H}^+$ : 425.1318, found 425.1313.

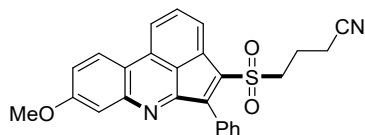

**4-((8-methoxy-5-phenylcyclopenta[gh]phenanthridin-4-yl)sulfonyl)butanenitrile (3ma).** Yellow solid; (30.4 mg, 69%); melting point: 201-202 °C;  $R_f = 0.4$  (DCM);  $^1\text{H}$  NMR (400 MHz,  $\text{CDCl}_3$ ):  $\delta$  = 8.46 (d,  $J = 9.2$  Hz, 1H), 8.34 (d,  $J = 8.4$  Hz, 1H), 8.19 (d,  $J = 7.2$  Hz, 1H), 7.94-7.91 (m, 2H), 7.86-7.82 (m, 1H), 7.78 (d,  $J = 2.8$  Hz, 1H), 7.64-7.58 (m, 3H), 7.45-7.42 (m, 1H), 3.99 (s, 3H), 3.13 (t,  $J = 7.2$  Hz, 2H), 2.43 (t,  $J = 7.2$  Hz, 2H), 2.11-2.04 (m, 2H) ppm;  $^{13}\text{C}$  NMR (101 MHz,  $\text{CDCl}_3$ ):  $\delta$  160.8, 160.3, 150.2, 148.6, 139.0, 134.9, 133.0, 131.2, 130.4, 129.5, 129.3, 128.3, 124.7, 123.7, 123.5, 120.5, 118.7, 118.6, 117.9, 112.0, 55.7, 53.7, 19.0, 16.1 ppm. ESI-HRMS:  $m/z$  Calcd for  $\text{C}_{26}\text{H}_{20}\text{N}_2\text{O}_3\text{S}+\text{H}^+$ : 441.1267, found 441.1274.

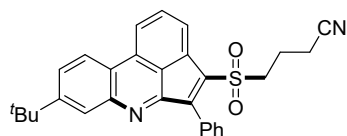

**4-((8-tert-butyl)-5-phenylcyclopenta[gh]phenanthridin-4-yl)sulfonyl)butanenitrile (3na).** Yellow solid; (28.9 mg, 62%); melting point: 190-192 °C;  $R_f = 0.6$  (DCM);  $^1\text{H}$  NMR (400 MHz,  $\text{CDCl}_3$ ):  $\delta$  = 8.52 (d,  $J = 8.8$  Hz, 1H), 8.41-8.37 (m, 2H), 8.23 (d,  $J = 7.2$  Hz, 1H), 7.96-7.93 (m, 2H), 7.91-7.83 (m, 2H), 7.63-7.59 (m, 3H), 3.14 (t,  $J = 7.2$  Hz, 2H), 2.43 (t,  $J = 7.2$  Hz, 2H), 2.11-2.04 (m, 2H), 1.47 (s, 9H) ppm;  $^{13}\text{C}$  NMR (101 MHz,  $\text{CDCl}_3$ ):  $\delta$  160.4, 152.7, 148.7, 148.6, 139.0, 134.9, 132.9, 131.3, 130.4, 129.5, 129.1, 128.6, 128.3, 127.6, 125.0, 123.6, 122.6, 122.2, 119.3, 117.9, 53.6, 35.2, 31.3, 18.9, 16.0 ppm. ESI-HRMS:  $m/z$  Calcd for  $\text{C}_{29}\text{H}_{26}\text{N}_2\text{O}_2\text{S}+\text{H}^+$ : 467.1788, found 467.1789.

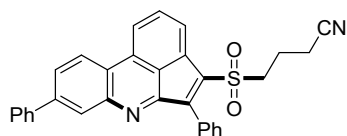

**4-((5,8-diphenylcyclopenta[gh]phenanthridin-4-yl)sulfonyl)butanenitrile (3oa).** Yellow solid; (19.4 mg, 40%); melting point: 212-213 °C;  $R_f = 0.5$  (DCM);  $^1\text{H}$  NMR (400 MHz,  $\text{CDCl}_3$ ):  $\delta$  = 8.65-8.63 (m, 2H), 8.44 (d,  $J = 8.0$  Hz, 1H), 8.26 (d,  $J = 6.8$  Hz, 1H), 8.09-8.06 (m, 1H), 7.97-7.94 (m, 2H), 7.91-7.87 (m, 1H), 7.81-7.79 (m, 2H), 7.65-7.59 (m, 2H), 7.53-7.50 (m, 2H), 7.45-7.41 (m, 1H), 3.15 (t,  $J = 7.2$  Hz, 2H), 2.44 (t,  $J = 7.2$  Hz, 2H), 2.13-2.06 (m, 2H) ppm;  $^{13}\text{C}$  NMR (101 MHz,  $\text{CDCl}_3$ ):  $\delta$  161.0, 148.8, 148.5, 142.0, 139.7, 139.4, 135.0, 133.2, 131.3, 130.5, 130.3, 129.4, 129.1, 129.0, 128.4, 128.3, 128.0, 127.4, 125.4, 123.7, 123.5, 119.5, 117.9, 53.6, 19.0, 16.1 ppm. ESI-HRMS:  $m/z$  Calcd for  $\text{C}_{31}\text{H}_{22}\text{N}_2\text{O}_2\text{S}+\text{H}^+$ : 487.1475, found 487.1467.

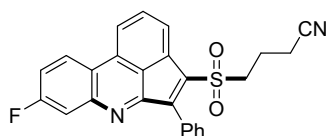

4-((8-fluoro-5-phenylcyclopenta[gh]phenanthridin-4-yl)sulfonyl)butanenitrile (**3pa**). Yellow solid; (32.1 mg, 75%); melting point: 160-161 °C;  $R_f$  = 0.4 (DCM);  $^1\text{H}$  NMR (400 MHz,  $\text{CDCl}_3$ ):  $\delta$  = 8.56-8.52 (m, 1H), 8.35 (d,  $J$  = 8.4 Hz, 1H), 8.23 (d,  $J$  = 7.2 Hz, 1H), 8.04-8.01 (m, 2H), 7.93-7.90 (m, 2H), 7.89-7.85 (m, 1H), 7.64-7.56 (m, 4H), 3.14 (t,  $J$  = 7.2 Hz, 2H), 2.43 (t,  $J$  = 7.2 Hz, 2H), 2.11-2.04 (m, 2H) ppm;  $^{13}\text{C}$  NMR (101 MHz,  $\text{CDCl}_3$ ):  $\delta$  162.6 (d,  $J$  = 250.6 Hz), 161.7, 161.4, 149.5 (d,  $J$  = 11.9 Hz), 148.3, 139.8, 135.0, 133.4, 131.2, 130.5, 129.2, 129.1, 128.4, 125.4, 124.6 (d,  $J$  = 9.5 Hz), 123.5, 121.1 (d,  $J$  = 2.1 Hz), 119.1, 118.1 (d,  $J$  = 36.4 Hz), 118.0, 117.0 (d,  $J$  = 21.1 Hz), 53.6, 18.9, 16.1 ppm;  $^{19}\text{F}$  NMR (376 MHz,  $\text{CDCl}_3$ ):  $\delta$  -110.3 ppm. ESI-HRMS:  $m/z$  Calcd for  $\text{C}_{25}\text{H}_{17}\text{FN}_2\text{O}_2\text{S}+\text{H}^+$ : 429.1068, found 429.1076.

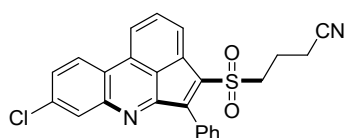

4-((8-chloro-5-phenylcyclopenta[gh]phenanthridin-4-yl)sulfonyl)butanenitrile (**3qa**). Yellow solid; (28.9 mg, 65%); melting point: 223-224 °C;  $R_f$  = 0.4 (DCM);  $^1\text{H}$  NMR (400 MHz,  $\text{CDCl}_3$ ):  $\delta$  = 8.47 (d,  $J$  = 8.8 Hz, 1H), 8.37-8.33 (m, 2H), 8.24 (d,  $J$  = 7.2 Hz, 1H), 7.92-7.85 (m, 3H), 7.75-7.72 (m, 1H), 7.62-7.59 (m, 3H), 3.14 (t,  $J$  = 7.2 Hz, 2H), 2.43 (t,  $J$  = 7.2 Hz, 2H), 2.11-2.04 (m, 2H) ppm;  $^{13}\text{C}$  NMR (101 MHz,  $\text{CDCl}_3$ ):  $\delta$  161.6, 148.8, 148.3, 139.9, 135.0, 134.9, 133.5, 131.5, 131.2, 130.5, 129.5, 129.2, 128.9, 128.4, 125.8, 124.1, 123.6, 122.9, 119.4, 117.9, 53.5, 18.9, 16.1 ppm. ESI-HRMS:  $m/z$  Calcd for  $\text{C}_{25}\text{H}_{17}\text{ClN}_2\text{O}_2\text{S}+\text{H}^+$ : 445.0772, found 445.0770.

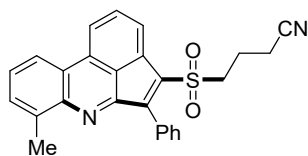

4-((7-methyl-5-phenylcyclopenta[gh]phenanthridin-4-yl)sulfonyl)butanenitrile (**3ra**). Yellow solid; (8.5 mg, 20%); melting point: 171-172 °C;  $R_f$  = 0.5 (DCM);  $^1\text{H}$  NMR (400 MHz,  $\text{CDCl}_3$ ):  $\delta$  = 8.57-8.54 (m, 1H), 8.43-8.38 (m, 2H), 8.23 (d,  $J$  = 7.2 Hz, 1H), 8.03-8.01 (m, 2H), 7.84 (t,  $J$  = 7.6 Hz, 1H), 7.70-7.66 (m, 2H), 7.62-7.59 (m, 3H), 3.16 (t,  $J$  = 7.2 Hz, 2H), 2.85 (s, 3H), 2.43 (t,  $J$  = 7.2 Hz, 2H), 2.11-2.04 (m, 2H) ppm;  $^{13}\text{C}$  NMR (101 MHz,  $\text{CDCl}_3$ ):  $\delta$  158.9, 148.5, 147.1, 140.7, 138.5, 135.0, 132.7, 131.6, 130.3, 130.0, 129.7, 129.5, 128.8, 128.1, 125.1, 124.4, 123.8, 120.8, 119.2, 118.0, 53.6, 19.0, 18.7, 16.1 ppm. ESI-HRMS:  $m/z$  Calcd for  $\text{C}_{26}\text{H}_{20}\text{N}_2\text{O}_2\text{S}+\text{H}^+$ : 425.1318, found 425.1327.

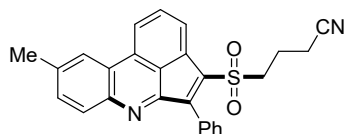

4-((9-methyl-5-phenylcyclopenta[gh]phenanthridin-4-yl)sulfonyl)butanenitrile (**3ra'**). Yellow solid; (25.0 mg, 59%); melting point: 165-167 °C;  $R_f$  = 0.4 (DCM);  $^1\text{H}$  NMR (400 MHz,  $\text{CDCl}_3$ ):  $\delta$  = 8.42 (d,  $J$  = 8.4 Hz, 1H), 8.37 (s, 1H), 8.28-8.24 (m, 2H), 7.95-7.92 (m, 2H), 7.88-7.85 (m, 1H), 7.66-7.58 (m, 4H), 3.14 (t,  $J$  = 7.2 Hz, 2H), 2.68 (s, 3H), 2.43 (t,  $J$  = 7.2 Hz, 2H), 2.12-2.04 (m, 2H)

ppm;  $^{13}\text{C}$  NMR (101 MHz,  $\text{CDCl}_3$ ):  $\delta$  159.5, 148.7, 146.9, 139.8, 138.7, 134.9, 132.8, 132.2, 131.3, 130.9, 130.3, 129.6, 129.0, 128.3, 125.3, 124.5, 123.6, 122.7, 119.6, 117.9, 53.6, 22.1, 19.0, 16.1 ppm. ESI-HRMS:  $m/z$  Calcd for  $\text{C}_{26}\text{H}_{20}\text{N}_2\text{O}_2\text{S}+\text{H}^+$ : 425.1318, found 425.1317.

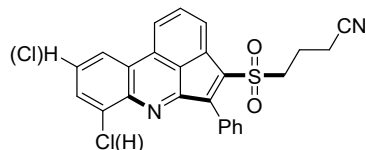

4-((7-chloro-5-phenylcyclopenta[gh]phenanthridin-4-yl)sulfonyl)butanenitrile (**3sa**) and 4-((9-chloro-5-phenylcyclopenta[gh]phenanthridin-4-yl)sulfonyl)butanenitrile (**3sa'**). Yellow solid; (27.5 mg, 62%); melting point: 86-87 °C;  $R_f = 0.5$  (DCM);  $^1\text{H}$  NMR (400 MHz,  $\text{CDCl}_3$ ): 8.50-8.46 (m, 1H), 8.38-8.36 (m, 1H), 8.34-8.26 (m, 2H), 8.07-8.05 (m, 2H), 7.94-7.85 (m, 3H), 7.76-7.68 (m, 1H), 7.64-7.59 (m, 4H), 3.18-3.11 (m, 3H), 2.43 (t,  $J = 7.2$  Hz), 2.13-2.04 (m, 3H);  $^{13}\text{C}$  NMR (101 MHz,  $\text{CDCl}_3$ ):  $\delta$  160.7, 148.3, 148.1, 146.6, 144.4, 139.5, 139.4, 137.0, 135.3, 135.2, 135.0, 133.7, 133.5, 133.3, 131.7, 131.2, 130.6, 130.5, 129.8, 129.7, 129.2, 129.1, 128.9, 128.4, 128.3, 126.2, 126.1, 126.0, 125.5, 123.7, 123.5, 122.7, 121.8, 119.6, 117.9, 53.6, 53.4, 18.907, 18.884, 16.1 ppm. ESI-HRMS:  $m/z$  Calcd for  $\text{C}_{25}\text{H}_{17}\text{ClN}_2\text{O}_2\text{S}+\text{H}^+$ : 445.0772, found 445.0762.

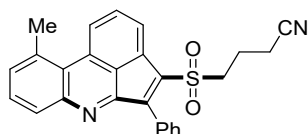

4-((10-methyl-5-phenylcyclopenta[gh]phenanthridin-4-yl)sulfonyl)butanenitrile (**3ta**). Yellow solid; (25.0 mg, 59%); melting point: 186-187 °C;  $R_f = 0.4$  (DCM);  $^1\text{H}$  NMR (400 MHz,  $\text{CDCl}_3$ ):  $\delta$  = 8.71 (d,  $J = 8.8$  Hz, 1H), 8.30 (d,  $J = 7.2$  Hz, 1H), 7.95-7.92 (m, 1H), 7.90-7.86 (m, 1H), 7.71 (t,  $J = 7.6$  Hz, 1H), 7.65-7.59 (m, 4H), 3.15 (t,  $J = 7.6$  Hz, 2H), 2.43 (t,  $J = 7.2$  Hz, 2H), 2.12-2.04 (m, 2H) ppm;  $^{13}\text{C}$  NMR (101 MHz,  $\text{CDCl}_3$ ):  $\delta$  160.0, 149.6, 148.0, 138.9, 136.4, 135.0, 132.9, 132.5, 131.8, 131.4, 130.5, 130.3, 129.5, 128.4, 128.349, 128.275, 128.2, 124.7, 123.9, 119.9, 117.9, 53.7, 25.5, 19.0, 16.1 ppm. ESI-HRMS:  $m/z$  Calcd for  $\text{C}_{26}\text{H}_{20}\text{N}_2\text{O}_2\text{S}+\text{H}^+$ : 425.1318, found 425.1308.

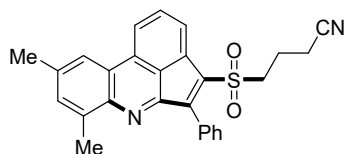

4-((7,9-dimethyl-5-phenylcyclopenta[gh]phenanthridin-4-yl)sulfonyl)butanenitrile (**3ua**). Yellow solid; (27.2 mg, 62%); melting point: 199-200 °C;  $R_f = 0.5$  (DCM);  $^1\text{H}$  NMR (400 MHz,  $\text{CDCl}_3$ ):  $\delta$  = 8.37 (d,  $J = 8.0$  Hz, 1H), 8.20 (t,  $J = 7.2$  Hz, 2H), 8.03-8.00 (m, 2H), 7.82 (t,  $J = 8.0$  Hz, 1H), 7.62-7.57 (m, 3H), 7.50 (s, 1H), 3.16 (t,  $J = 7.2$  Hz, 2H), 2.80 (s, 3H), 2.61 (s, 3H), 2.42 (t,  $J = 7.2$  Hz, 2H), 2.11-2.04 (m, 2H) ppm;  $^{13}\text{C}$  NMR (101 MHz,  $\text{CDCl}_3$ ):  $\delta$  157.8, 148.6, 145.6, 140.2, 139.3, 137.8, 134.9, 132.4, 131.8, 131.7, 130.2, 129.8, 129.1, 128.1, 125.0, 124.4, 123.7, 120.5, 119.3, 118.0, 53.6, 22.1, 19.0, 18.5, 16.1 ppm. ESI-HRMS:  $m/z$  Calcd for  $\text{C}_{27}\text{H}_{22}\text{N}_2\text{O}_2\text{S}+\text{H}^+$ : 439.1475, found 439.1476.

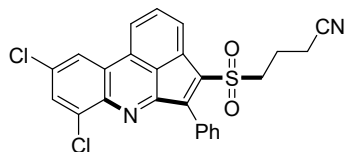

4-((7,9-dichloro-5-phenylcyclopenta[gh]phenanthridin-4-yl)sulfonyl)butanenitrile (**3va**). Yellow

solid; (19.6 mg, 41%); melting point: 215-216 °C;  $R_f = 0.5$  (DCM);  $^1\text{H NMR}$  (400 MHz,  $\text{CDCl}_3$ ):  $\delta = 8.44$  (d,  $J = 2.4$  Hz, 1H), 8.34-8.30 (m, 2H), 8.07-8.04 (m, 2H), 7.92-7.89 (m, 2H), 7.63-7.61 (m, 3H), 3.16 (t,  $J = 7.2$  Hz, 2H), 2.44 (t,  $J = 7.2$  Hz, 2H), 2.12-2.05 (m, 2H) ppm;  $^{13}\text{C NMR}$  (101 MHz,  $\text{CDCl}_3$ ):  $\delta$  160.9, 148.0, 143.0, 139.7, 137.9, 135.4, 134.7, 133.8, 131.7, 130.8, 130.1, 129.0, 128.4, 128.3, 126.7, 123.6, 121.6, 119.9, 117.9, 53.4, 18.9, 16.1 ppm. APCI-HRMS:  $m/z$  Calcd for  $\text{C}_{25}\text{H}_{16}\text{Cl}_2\text{N}_2\text{O}_2\text{S}+\text{H}^+$ : 479.0382, found 479.0373.

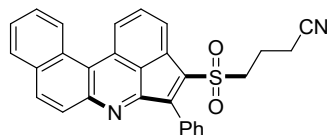

4-((5-phenylbenzo[*a*]cyclopenta[*gh*]phenanthridin-4-yl)sulfonyl)butanenitrile (**3wa**). Yellow solid; (23.9 mg, 52%); melting point: 207-208 °C;  $R_f = 0.4$  (DCM);  $^1\text{H NMR}$  (400 MHz,  $\text{CDCl}_3$ ):  $\delta = 9.16$  (d,  $J = 8.4$  Hz, 1H), 8.98 (d,  $J = 8.8$  Hz, 1H), 8.34-8.25 (m, 2H), 8.06 (t,  $J = 8.4$  Hz, 2H), 7.99-7.90 (m, 3H), 7.81-7.72 (m, 2H), 7.65-7.61 (m, 3H), 3.17 (t,  $J = 7.2$  Hz, 2H), 2.44 (t,  $J = 7.2$  Hz, 2H), 2.13-2.06 (m, 2H) ppm;  $^{13}\text{C NMR}$  (101 MHz,  $\text{CDCl}_3$ ):  $\delta$  159.7, 148.7, 148.5, 137.9, 135.4, 134.1, 133.1, 131.4, 130.5, 130.4, 130.2, 130.1, 129.7, 129.5, 129.0, 128.745, 128.689, 128.3, 127.6, 127.3, 125.6, 122.4, 120.2, 118.0, 53.8, 19.0, 16.1 ppm. ESI-HRMS:  $m/z$  Calcd for  $\text{C}_{29}\text{H}_{20}\text{N}_2\text{O}_2\text{S}+\text{H}^+$ : 461.1318, found 461.1324.

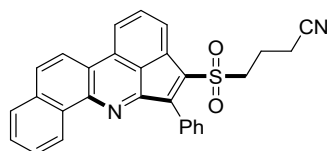

4-((5-phenylbenzo[*c*]cyclopenta[*gh*]phenanthridin-4-yl)sulfonyl)butanenitrile (**3xa**). Yellow solid; (29.0 mg, 63%); melting point: 177-178 °C;  $R_f = 0.5$  (DCM);  $^1\text{H NMR}$  (400 MHz,  $\text{CDCl}_3$ ):  $\delta = 9.34$ -9.32 (m, 2H), 8.51-8.45 (m, 2H), 8.29 (d,  $J = 6.8$  Hz, 1H), 8.13-8.06 (m, 3H), 8.01-7.98 (m, 1H), 7.90-7.86 (m, 1H), 7.77-7.64 (m, 5H), 3.18 (t,  $J = 7.2$  Hz, 2H), 2.44 (t,  $J = 7.2$  Hz, 2H), 2.13-2.06 (m, 2H) ppm;  $^{13}\text{C NMR}$  (101 MHz,  $\text{CDCl}_3$ ):  $\delta$  158.3, 148.9, 145.7, 137.5, 135.1, 133.3, 132.9, 132.8, 131.6, 130.3, 129.8, 129.2, 128.3, 127.943, 127.871, 127.6, 126.1, 125.2, 124.4, 122.5, 120.3, 119.6, 118.0, 53.7, 19.0, 16.1 ppm. ESI-HRMS:  $m/z$  Calcd for  $\text{C}_{29}\text{H}_{20}\text{N}_2\text{O}_2\text{S}+\text{H}^+$ : 461.1318, found 461.1319.

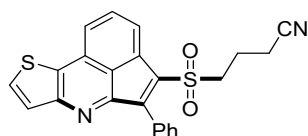

4-((5-phenylcyclopenta[*ij*]thieno[3,2-*c*]isoquinolin-4-yl)sulfonyl)butanenitrile (**3ya**). Yellow solid; (22.0 mg, 53%); melting point: 76-77 °C;  $R_f = 0.4$  (DCM);  $^1\text{H NMR}$  (400 MHz,  $\text{CDCl}_3$ ):  $\delta = 8.28$  (d,  $J = 6.8$  Hz, 1H), 8.11 (d,  $J = 8.4$  Hz, 1H), 7.92-7.90 (m, 2H), 7.87-7.80 (m, 3H), 7.63-7.57 (m, 3H), 3.12 (t,  $J = 7.2$  Hz, 2H), 2.43 (t,  $J = 7.2$  Hz, 2H), 2.10-2.03 (m, 2H) ppm;  $^{13}\text{C NMR}$  (101 MHz,  $\text{CDCl}_3$ ):  $\delta$  158.4, 155.8, 149.8, 136.3, 135.3, 133.1, 131.136, 131.092, 130.4, 129.6, 128.4, 127.9, 127.7, 127.1, 126.4, 124.6, 118.4, 117.9, 53.8, 19.0, 16.0 ppm. ESI-HRMS:  $m/z$  Calcd for  $\text{C}_{23}\text{H}_{16}\text{N}_2\text{O}_2\text{S}_2+\text{H}^+$ : 417.0726, found 417.0723.

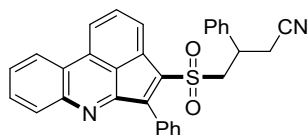

*3-phenyl-4-((5-phenylcyclopenta[gh]phenanthridin-4-yl)sulfonyl)butanenitrile (3ab)*. Yellow solid; (29.2 mg, 60%); melting point: 98-99 °C;  $R_f$  = 0.4 (DCM);  $^1\text{H NMR}$  (400 MHz,  $\text{CDCl}_3$ ):  $\delta$  = 8.59-8.56 (m, 1H), 8.40-8.35 (m, 2H), 8.21 (d,  $J$  = 7.2 Hz, 1H), 7.94-7.91 (m, 2H), 7.86-7.80 (m, 3H), 7.60-7.56 (m, 3H), 7.03 (t,  $J$  = 7.6 Hz, 2H), 6.95-6.91 (m, 3H), 3.63-3.56 (m, 1H), 3.49-3.37 (m, 2H), 2.81-2.74 (m, 2H) ppm;  $^{13}\text{C NMR}$  (101 MHz,  $\text{CDCl}_3$ ):  $\delta$  160.4, 148.4, 148.2, 139.5, 138.3, 135.1, 132.9, 132.5, 131.6, 130.4, 129.3, 129.094, 129.068, 128.7, 128.3, 127.9, 126.9, 125.3, 124.5, 123.5, 123.0, 119.5, 117.0, 58.8, 36.7, 24.3 ppm. ESI-HRMS:  $m/z$  Calcd for  $\text{C}_{31}\text{H}_{22}\text{N}_2\text{O}_2\text{S}+\text{H}^+$ : 487.1475, found 487.1477.

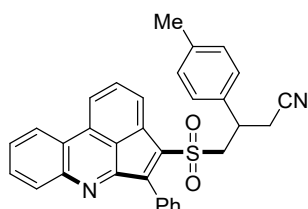

*4-((5-phenylcyclopenta[gh]phenanthridin-4-yl)sulfonyl)-3-(p-tolyl)butanenitrile (3ac)*. Yellow solid; (28.0 mg, 56%); melting point: 100-101 °C;  $R_f$  = 0.4 (DCM);  $^1\text{H NMR}$  (400 MHz,  $\text{CDCl}_3$ ):  $\delta$  = 8.58-8.56 (m, 1H), 8.40-8.35 (m, 2H), 8.18 (d,  $J$  = 7.2 Hz, 1H), 7.97-7.94 (m, 2H), 7.85-7.78 (m, 3H), 7.62-7.58 (m, 3H), 6.78-6.69 (m, 4H), 3.59-3.52 (m, 1H), 3.42-3.39 (m, 2H), 2.70 (d,  $J$  = 6.8 Hz, 2H), 1.80 (s, 3H) ppm;  $^{13}\text{C NMR}$  (101 MHz,  $\text{CDCl}_3$ ):  $\delta$  160.4, 148.3, 148.2, 139.5, 137.8, 135.2, 134.7, 132.8, 132.4, 131.7, 130.4, 129.3, 129.2, 129.0, 128.9, 128.2, 126.8, 125.3, 124.5, 123.3, 122.9, 119.5, 117.1, 58.9, 36.6, 24.5, 20.5 ppm. ESI-HRMS:  $m/z$  Calcd for  $\text{C}_{32}\text{H}_{24}\text{N}_2\text{O}_2\text{S}+\text{H}^+$ : 501.1631, found 501.1640.

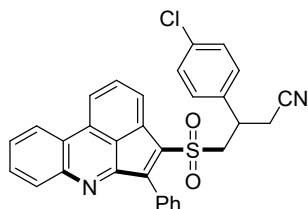

*3-(4-chlorophenyl)-4-((5-phenylcyclopenta[gh]phenanthridin-4-yl)sulfonyl)butanenitrile (3ad)*. Yellow solid; (25.5 mg, 49%); melting point: 102-103 °C;  $R_f$  = 0.4 (DCM);  $^1\text{H NMR}$  (400 MHz,  $\text{CDCl}_3$ ):  $\delta$  = 8.61-8.59 (m, 1H), 8.45-8.37 (m, 2H), 8.19 (d,  $J$  = 7.2 Hz, 1H), 7.97-7.94 (m, 2H), 7.87-7.80 (m, 3H), 7.62-7.58 (m, 3H), 6.96-6.84 (m, 4H), 3.61-3.55 (m, 1H), 3.43-3.33 (m, 2H), 2.78-2.67 (m, 2H) ppm;  $^{13}\text{C NMR}$  (101 MHz,  $\text{CDCl}_3$ ):  $\delta$  160.2, 148.3, 139.4, 136.4, 135.0, 134.0, 132.8, 132.5, 131.6, 130.6, 129.3, 129.2, 129.1, 128.8, 128.4, 125.3, 124.6, 123.6, 123.0, 119.4, 116.7, 58.5, 36.4, 24.3 ppm. ESI-HRMS:  $m/z$  Calcd for  $\text{C}_{31}\text{H}_{21}\text{ClN}_2\text{O}_2\text{S}+\text{H}^+$ : 521.1085, found 521.1078.

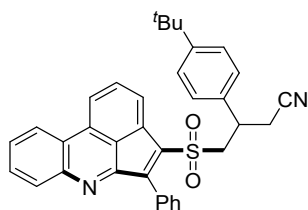

*3-(4-(tert-butyl)phenyl)-4-((5-phenylcyclopenta[gh]phenanthridin-4-yl)sulfonyl)butanenitrile (3ae)*. Yellow solid; (37.4 mg, 69%); melting point: 102-103 °C;  $R_f$  = 0.5 (DCM);  $^1\text{H NMR}$  (400

MHz, CDCl<sub>3</sub>):  $\delta$  = 8.57-8.55 (m, 1H), 8.39-8.33 (m, 2H), 8.23 (d,  $J$  = 6.8 Hz, 1H), 7.90-7.77 (m, 5H), 7.60-7.56 (m, 3H), 6.97-6.80 (m, 4H), 3.63-3.56 (m, 1H), 3.48-3.39 (m, 2H), 2.78-2.67 (m, 2H), 0.94 (s, 9H) ppm; <sup>13</sup>C NMR (101 MHz, CDCl<sub>3</sub>):  $\delta$  160.4, 151.1, 148.3, 148.2, 139.5, 135.2, 135.0, 132.9, 132.5, 131.7, 130.4, 129.3, 129.044, 129.028, 128.2, 126.6, 125.5, 125.3, 124.6, 123.4, 122.9, 119.5, 117.2, 59.0, 36.5, 34.1, 30.8, 24.5 ppm. ESI-HRMS:  $m/z$  Calcd for C<sub>35</sub>H<sub>30</sub>N<sub>2</sub>O<sub>2</sub>S+H<sup>+</sup>: 543.2101, found 543.2110.

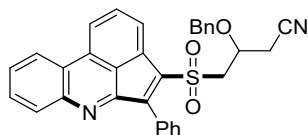

*3-(benzyloxy)-4-((5-phenylcyclopenta[gh]phenanthridin-4-yl)sulfonyl)butanenitrile (3af)*. Yellow solid; (20.1 mg, 39%); melting point: 67-68 °C;  $R_f$  = 0.4 (DCM); <sup>1</sup>H NMR (400 MHz, CDCl<sub>3</sub>):  $\delta$  = 8.59-8.56 (m, 1H), 8.40-8.35 (m, 2H), 8.23 (d,  $J$  = 6.8 Hz, 1H), 7.89-7.81 (m, 5H), 7.62-7.58 (m, 3H), 6.92-6.83 (m, 5H), 4.36 (d,  $J$  = 11.2 Hz, 1H), 4.21-4.14 (m, 2H), 3.45 (dd,  $J$  = 14.8 Hz,  $J$  = 6.0 Hz, 1H), 3.19 (dd,  $J$  = 14.8 Hz,  $J$  = 6.0 Hz, 1H), 2.69 (dd,  $J$  = 16.8 Hz,  $J$  = 4.8 Hz, 1H), 2.53 (dd,  $J$  = 16.8 Hz,  $J$  = 5.6 Hz, 1H) ppm; <sup>13</sup>C NMR (101 MHz, CDCl<sub>3</sub>):  $\delta$  160.5, 148.4, 148.3, 140.1, 135.7, 135.0, 132.9, 132.5, 131.4, 130.4, 129.5, 129.2, 129.1, 129.0, 128.4, 128.0, 127.7, 127.3, 125.1, 124.7, 123.5, 123.0, 119.5, 116.0, 72.0, 69.2, 58.2, 23.3 ppm. ESI-HRMS:  $m/z$  Calcd for C<sub>32</sub>H<sub>24</sub>N<sub>2</sub>O<sub>3</sub>S+H<sup>+</sup>: 517.1580, found 517.1577.

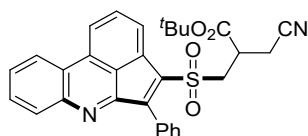

*tert-butyl 3-cyano-2-(((5-phenylcyclopenta[gh]phenanthridin-4-yl)sulfonyl)methyl)propanoate (3ag)*. Yellow solid; (17.3 mg, 34%); melting point: 117-119 °C;  $R_f$  = 0.5 (DCM); <sup>1</sup>H NMR (400 MHz, CDCl<sub>3</sub>):  $\delta$  = 8.62-8.60 (m, 1H), 8.47-8.39 (m, 2H), 8.25 (d,  $J$  = 6.8 Hz, 1H), 7.96-7.82 (m, 5H), 7.63-7.60 (m, 3H), 3.65 (dd,  $J$  = 14.4 Hz,  $J$  = 4.0 Hz, 1H), 3.30-3.25 (m, 1H), 3.20-3.14 (m, 1H), 2.83 (d,  $J$  = 5.6 Hz, 2H), 1.37 (s, 9H) ppm; <sup>13</sup>C NMR (101 MHz, CDCl<sub>3</sub>):  $\delta$  168.2, 160.5, 149.2, 148.4, 139.2, 134.8, 133.1, 132.6, 131.4, 130.5, 129.342, 129.296, 129.2, 128.3, 125.3, 124.6, 123.7, 123.1, 119.6, 116.4, 83.8, 54.9, 37.0, 27.7, 19.4 ppm. ESI-HRMS:  $m/z$  Calcd for C<sub>30</sub>H<sub>26</sub>N<sub>2</sub>O<sub>4</sub>S+H<sup>+</sup>: 511.1686, found 511.1678.

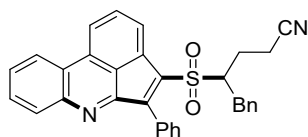

*(S)-5-phenyl-4-(((5-phenylcyclopenta[gh]phenanthridin-4-yl)sulfonyl)methyl)pentanenitrile (3ai)*. Yellow solid; (13 mg, 26%); melting point: 108-109 °C;  $R_f$  = 0.5 (DCM); <sup>1</sup>H NMR (400 MHz, CDCl<sub>3</sub>):  $\delta$  = 8.61-8.59 (m, 1H), 8.45-8.38 (m, 2H), 8.32 (d,  $J$  = 7.2 Hz, 1H), 8.05-8.02 (m, 2H), 7.91-7.87 (m, 1H), 7.85-7.80 (m, 2H), 7.69-7.63 (m, 3H), 7.10-7.00 (m, 3H), 6.80-6.78 (m, 2H), 3.31-3.20 (m, 2H), 2.68-2.62 (m, 1H), 2.40-2.36 (m, 2H), 2.28-2.19 (m, 1H), 1.90-1.81 (m, 1H) ppm; <sup>13</sup>C NMR (101 MHz, CDCl<sub>3</sub>):  $\delta$  160.4, 148.6, 148.4, 138.7, 135.5, 133.1, 132.6, 131.6, 130.6, 129.6, 129.2, 129.1, 128.729, 128.709, 128.4, 127.1, 125.6, 124.6, 123.7, 123.0, 119.6, 118.3, 62.9, 35.0, 23.0, 15.4 ppm. ESI-HRMS:  $m/z$  Calcd for C<sub>32</sub>H<sub>24</sub>N<sub>2</sub>O<sub>2</sub>S+Na<sup>+</sup>: 523.1451, found 523.1447.

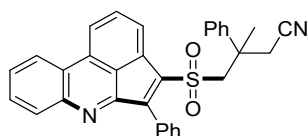

*3-methyl-3-phenyl-4-((5-phenylcyclopenta[gh]phenanthridin-4-yl)sulfonyl)butanenitrile (3aj).*

Yellow solid; (29.5 mg, 59%); melting point: 95-96 °C;  $R_f = 0.4$  (DCM);  $^1\text{H NMR}$  (400 MHz,  $\text{CDCl}_3$ ):  $\delta = 8.59$ -8.56 (m, 1H), 8.38-8.35 (m, 2H), 8.14 (d,  $J = 6.8$  Hz, 1H), 8.00-7.96 (m, 2H), 7.83-7.79 (m, 3H), 7.65-7.61 (m, 3H), 7.03-6.92 (m, 4H), 6.74 (t,  $J = 7.2$  Hz, 1H), 3.41 (q,  $J = 26.8$  Hz,  $J = 14.8$  Hz, 2H), 3.11 (dd,  $J = 62.4$  Hz,  $J = 16.8$  Hz, 2H), 1.65 (s, 3H) ppm;  $^{13}\text{C NMR}$  (101 MHz,  $\text{CDCl}_3$ ):  $\delta$  160.5, 148.2, 147.6, 140.8, 140.7, 135.0, 132.8, 132.5, 131.6, 130.4, 129.6, 129.020, 128.981, 128.4, 128.3, 127.2, 125.5, 125.4, 124.5, 123.3, 123.0, 119.5, 117.3, 64.0, 40.1, 29.1, 26.1 ppm. ESI-HRMS:  $m/z$  Calcd for  $\text{C}_{32}\text{H}_{24}\text{N}_2\text{O}_2\text{S}+\text{H}^+$ : 501.1631, found 501.1637.

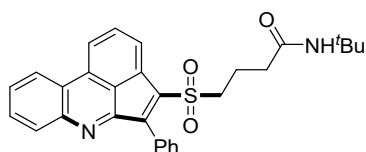

*N-(tert-butyl)-4-((5-phenylcyclopenta[gh]phenanthridin-4-yl)sulfonyl)butanamide (4).* Yellow solid; melting point: 178-179 °C;  $R_f = 0.6$  (DCM/MeOH=20:1);  $^1\text{H NMR}$  (400 MHz,  $\text{CDCl}_3$ ):  $\delta = 8.61$ -8.58 (m, 1H), 8.43-8.37 (m, 2H), 8.25 (d,  $J = 7.2$  Hz, 1H), 7.94-7.90 (m, 2H), 7.89-7.85 (m, 1H), 7.83-7.79 (m, 2H), 7.61-7.55 (m, 3H), 5.29 (s, 1H), 3.10 (t,  $J = 7.2$  Hz, 2H), 2.15 (t,  $J = 7.2$  Hz, 2H), 2.06-2.00 (m, 2H), 1.26 (s, 9H) ppm;  $^{13}\text{C NMR}$  (101 MHz,  $\text{CDCl}_3$ ):  $\delta$  170.3, 160.9, 148.4, 148.3, 139.8, 135.3, 133.0, 132.5, 131.3, 130.1, 129.7, 129.2, 129.042, 128.964, 128.1, 125.3, 124.6, 123.5, 123.0, 119.6, 54.6, 51.3, 35.0, 28.7, 18.8 ppm. ESI-HRMS:  $m/z$  Calcd for  $\text{C}_{36}\text{H}_{34}\text{N}_2\text{O}_3\text{S}+\text{H}^+$ : 485.1893, found 485.1896.



Copies of  $^1\text{H}$  NMR,  $^{13}\text{C}$  NMR,  $^{19}\text{F}$  NMR

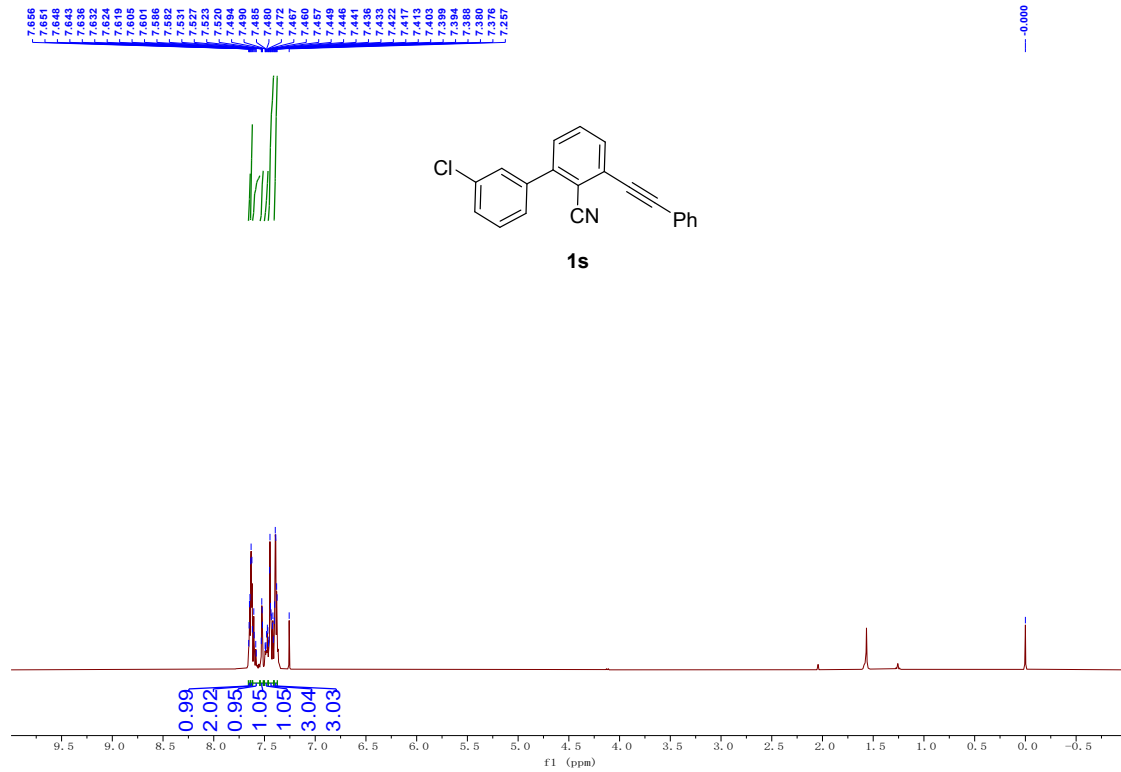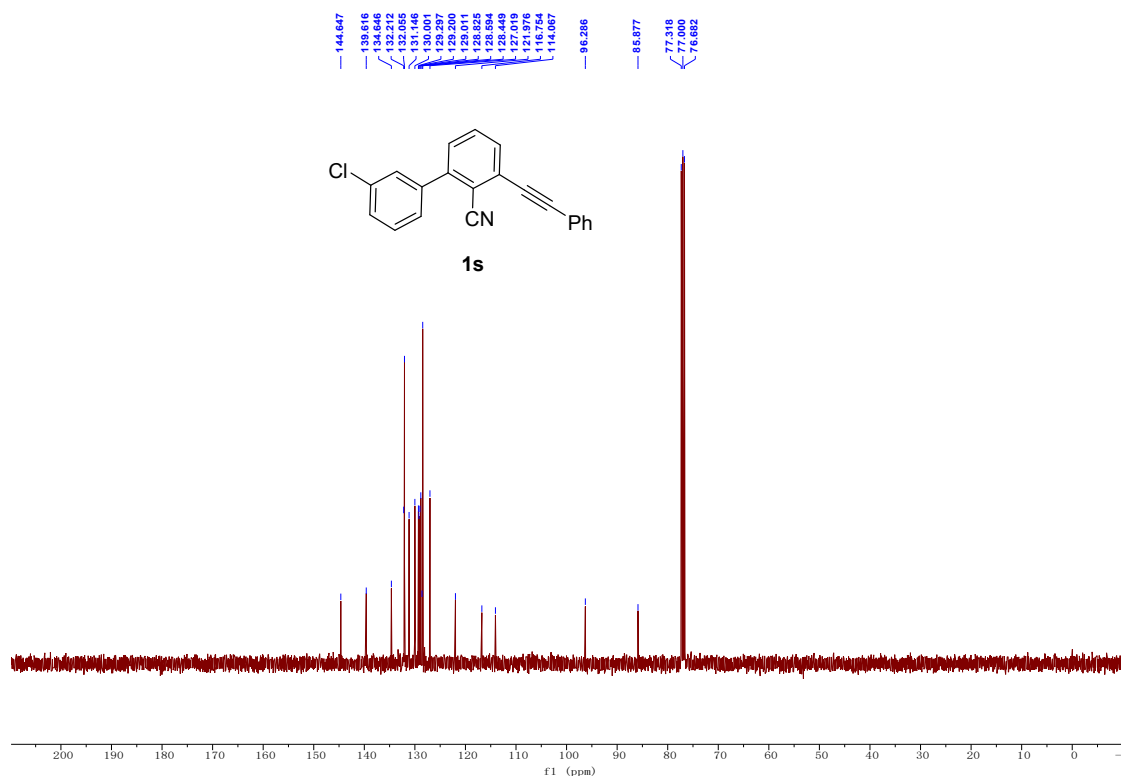

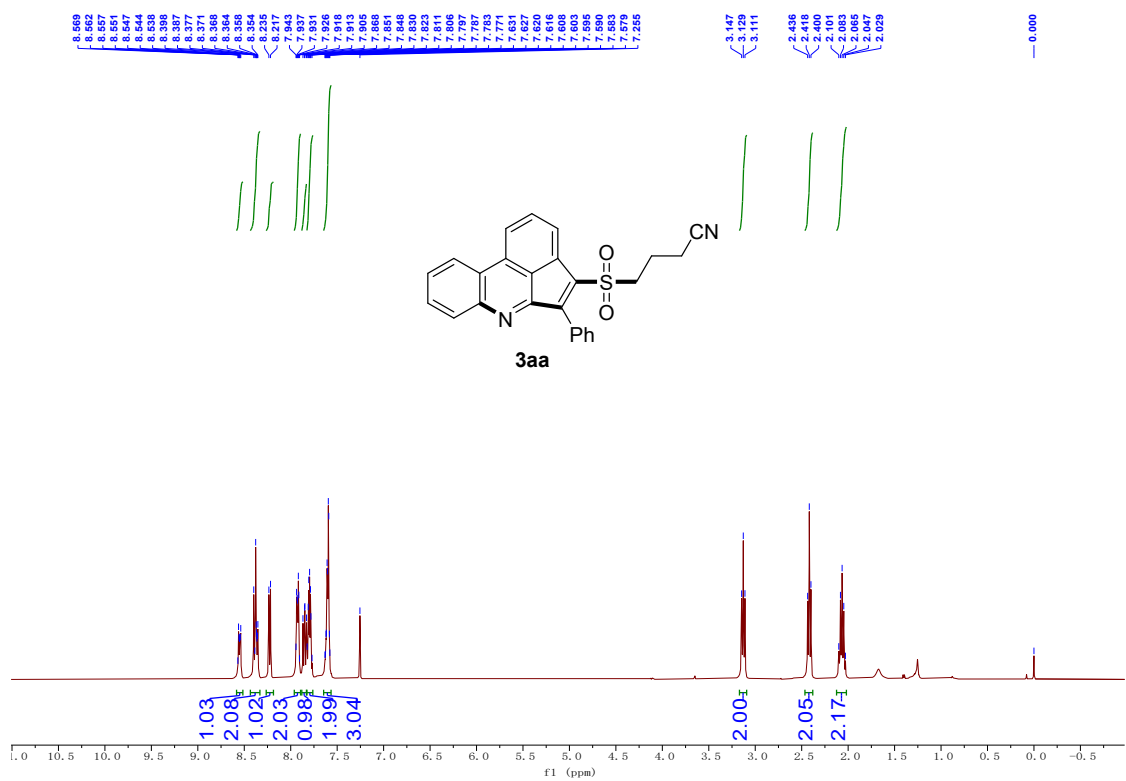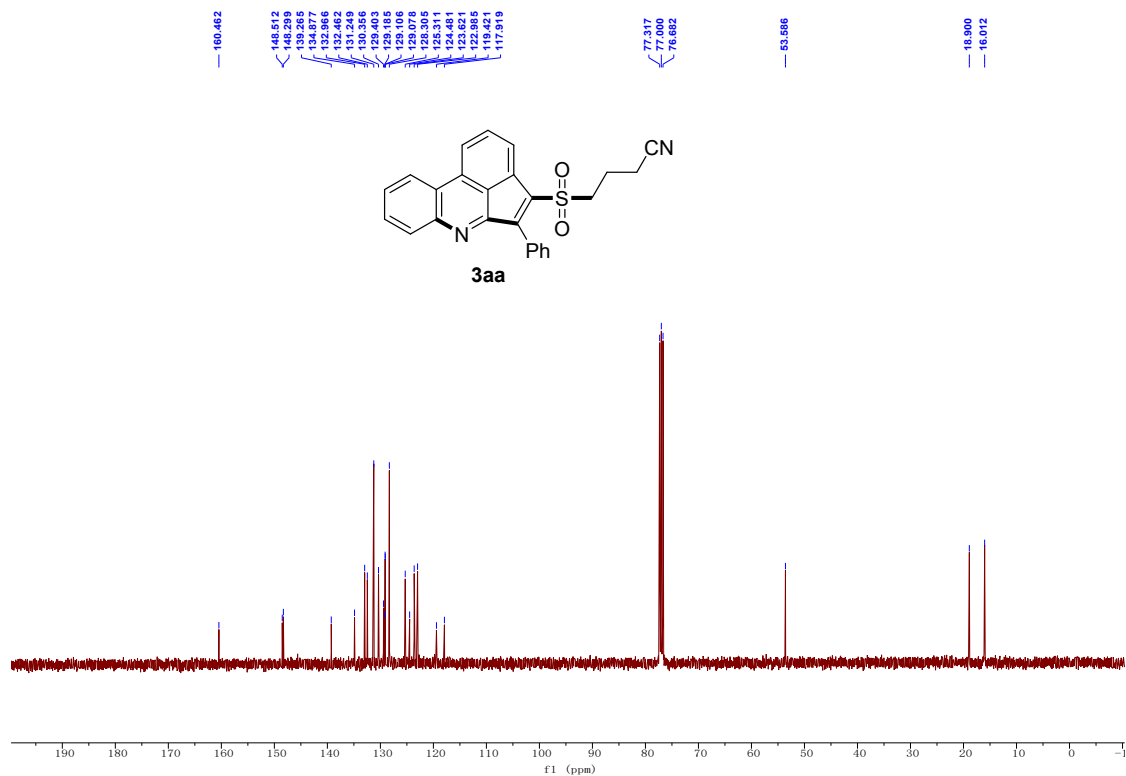

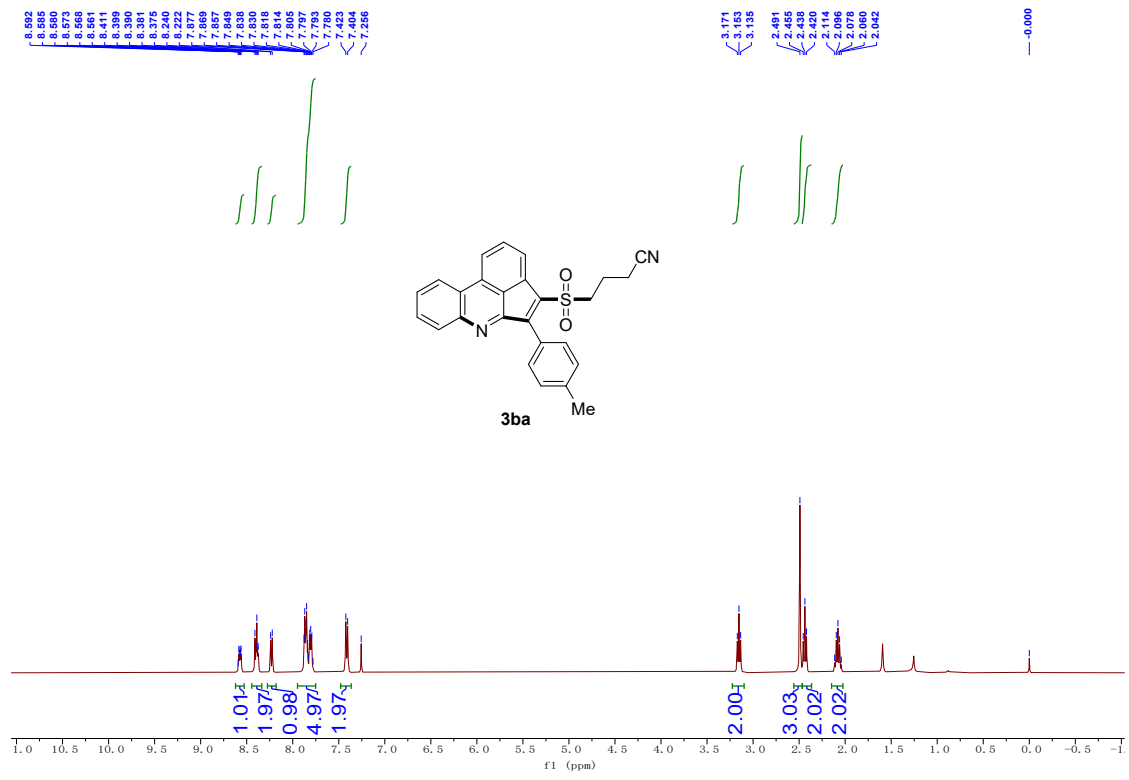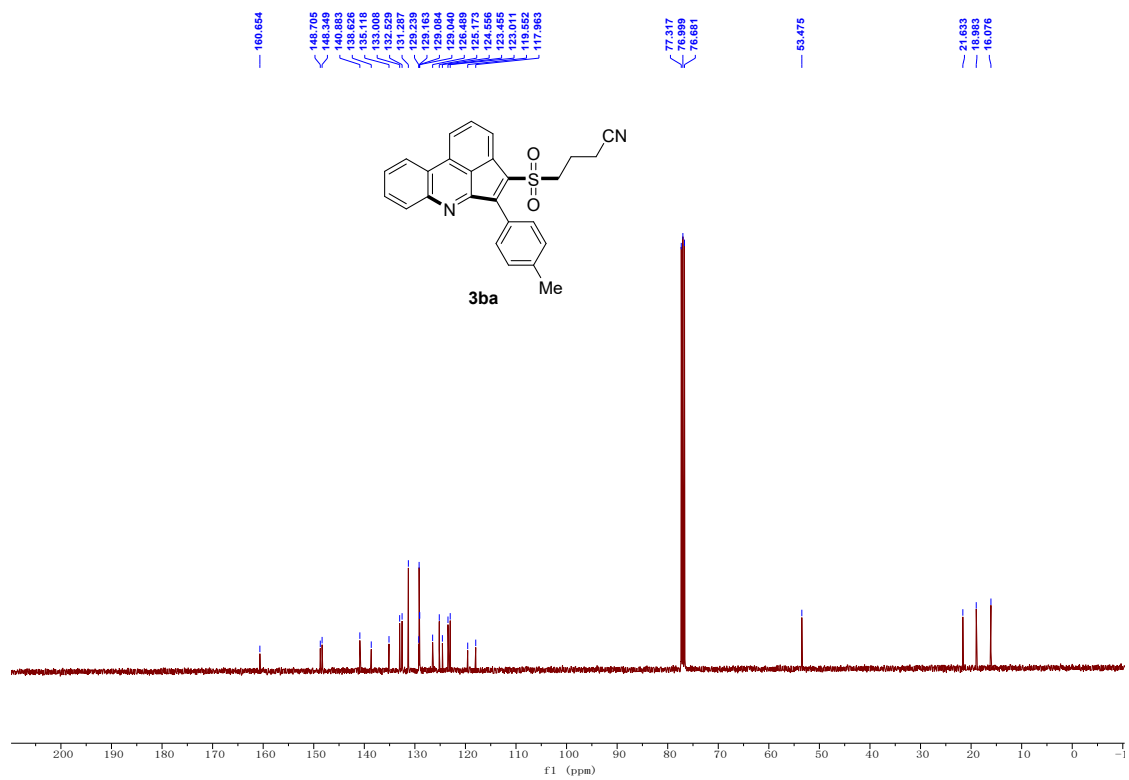

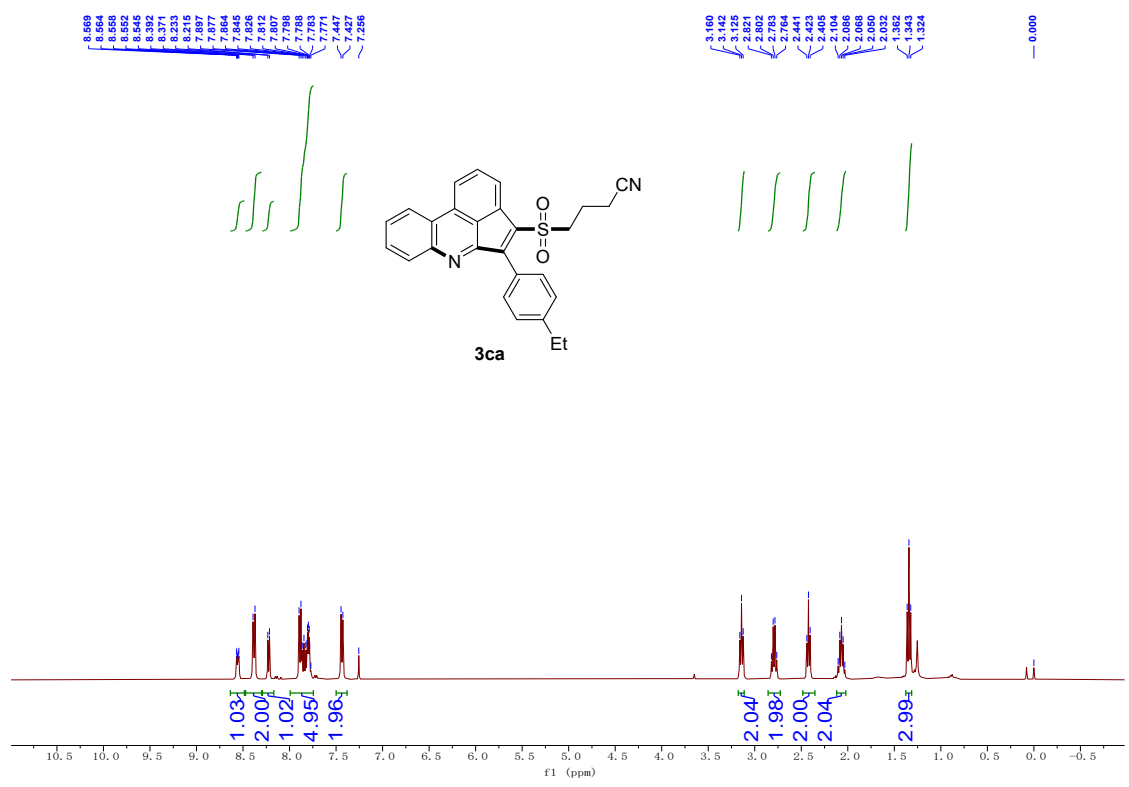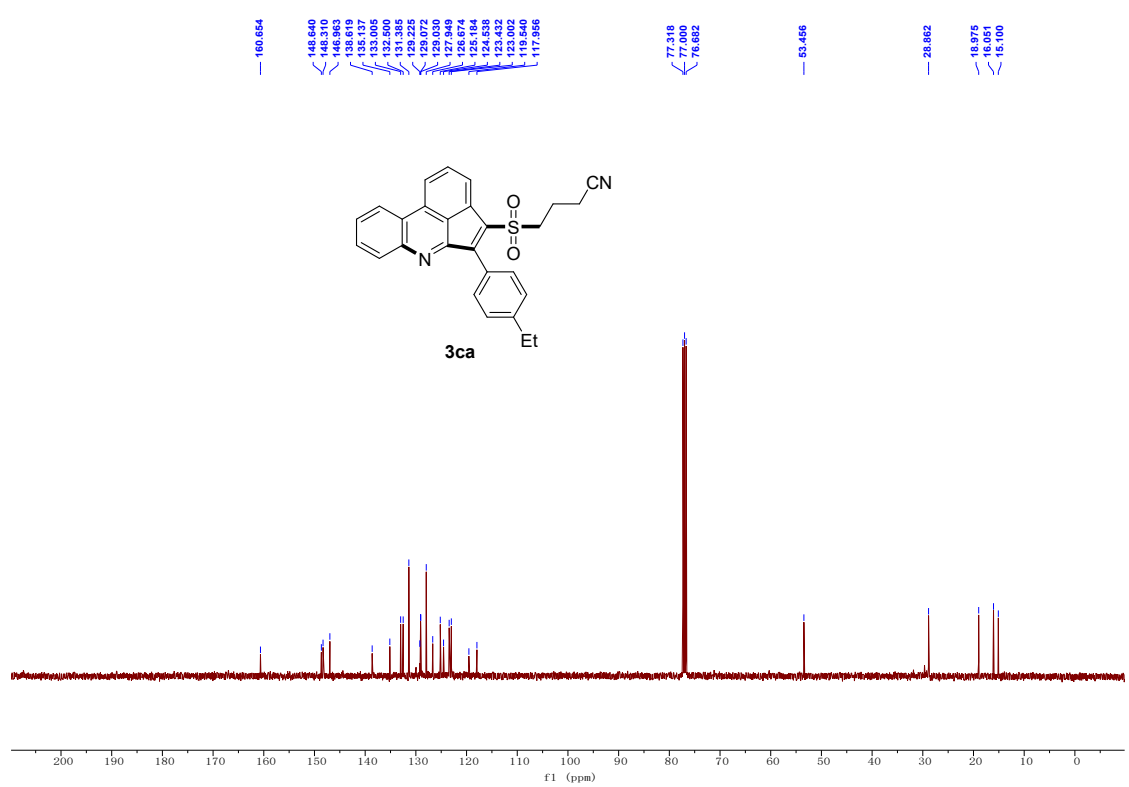

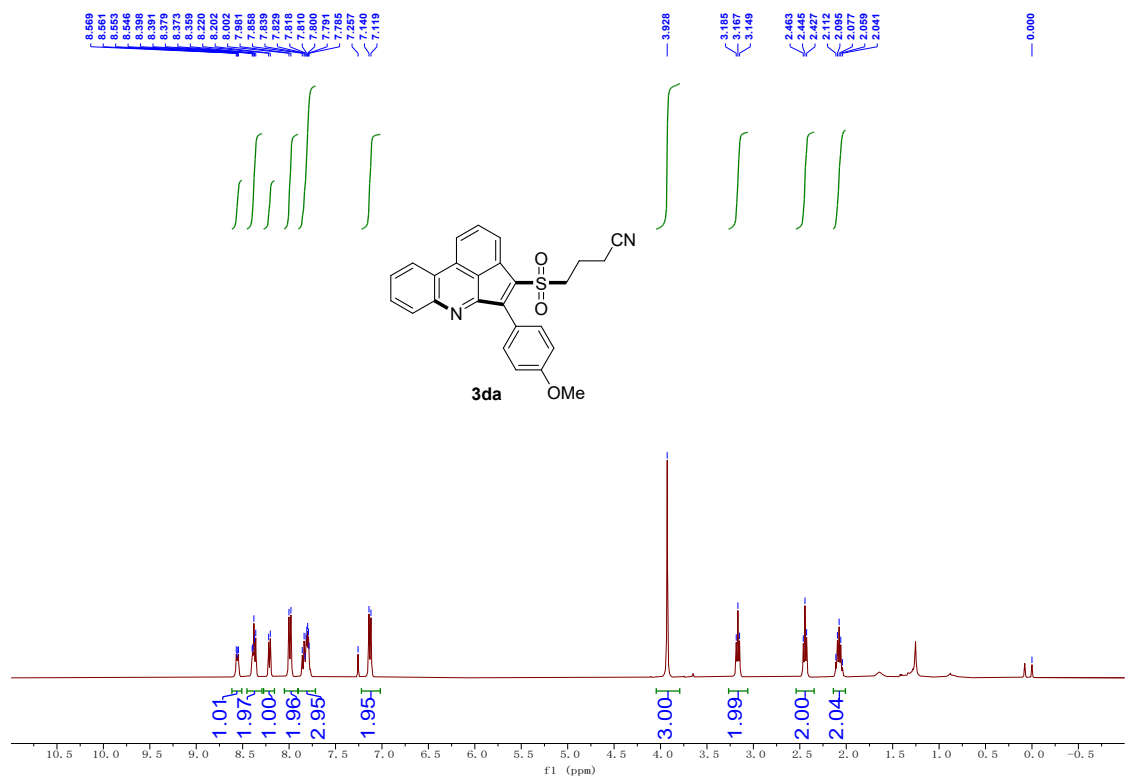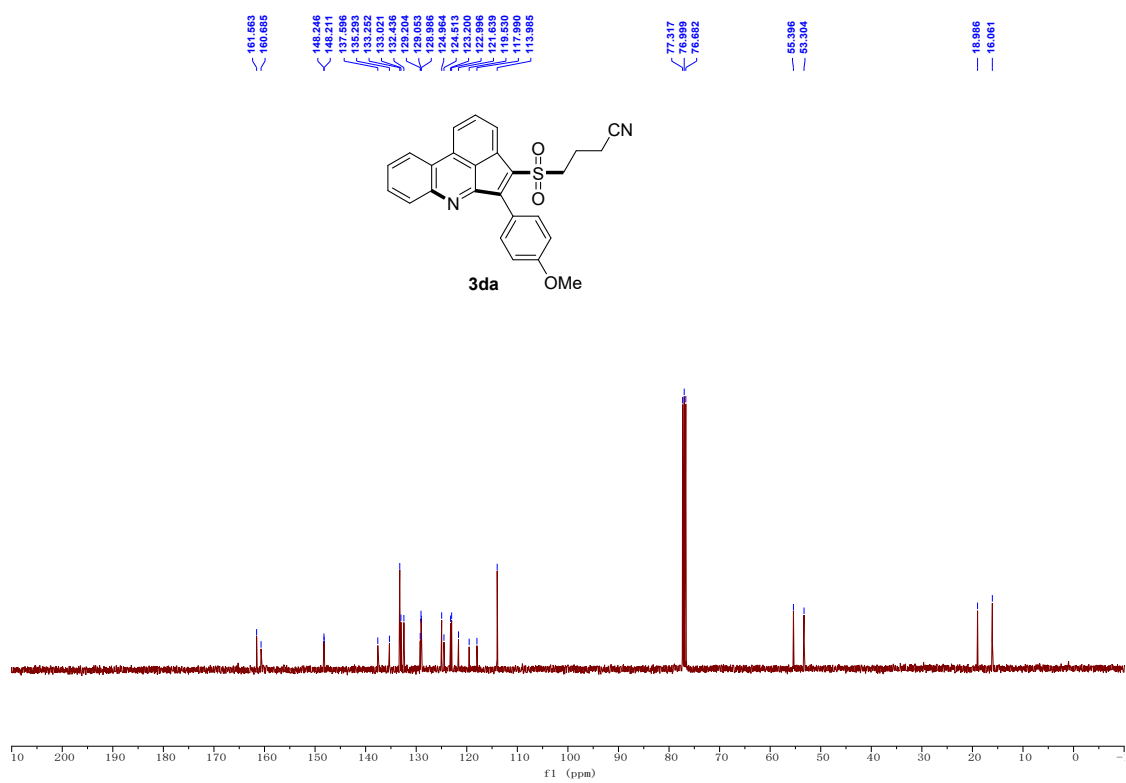

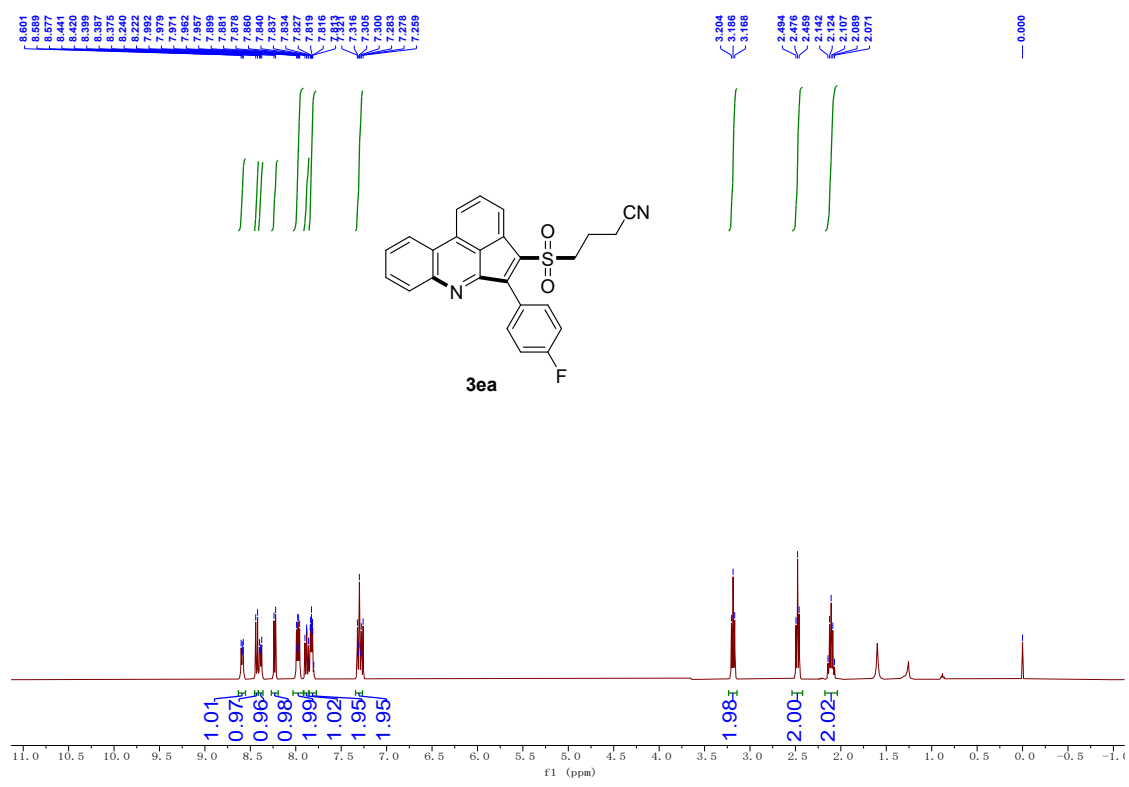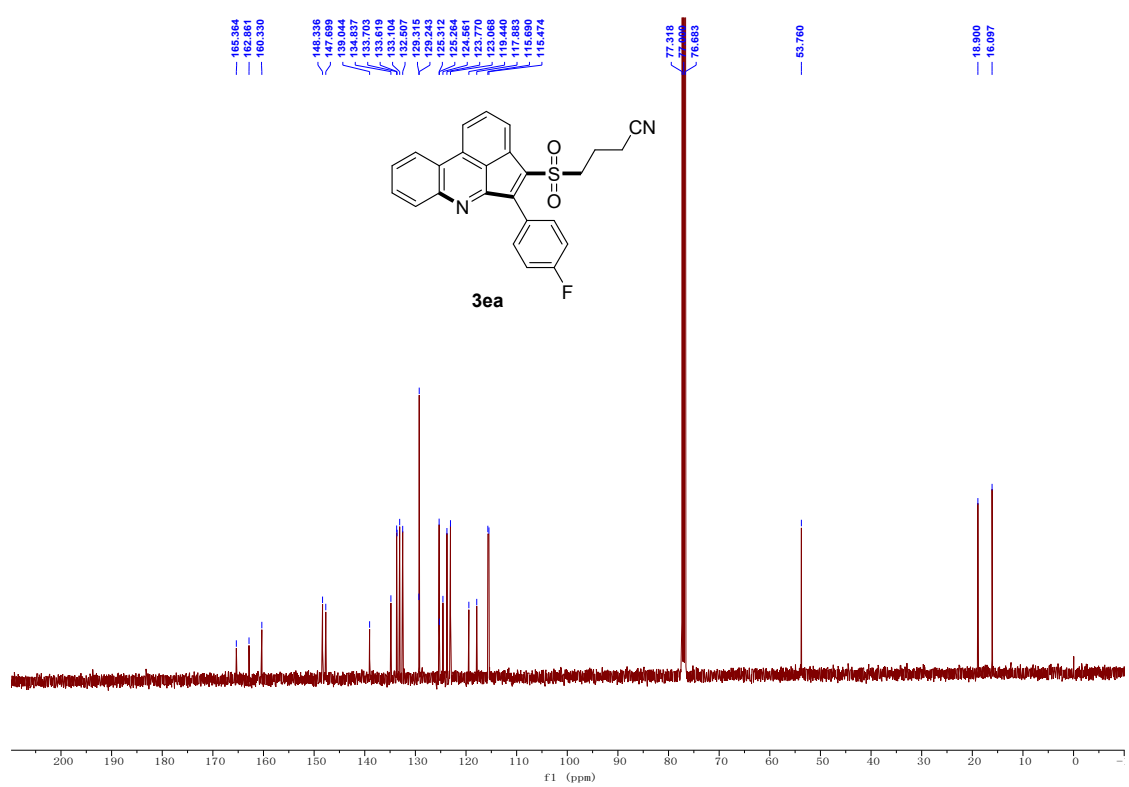

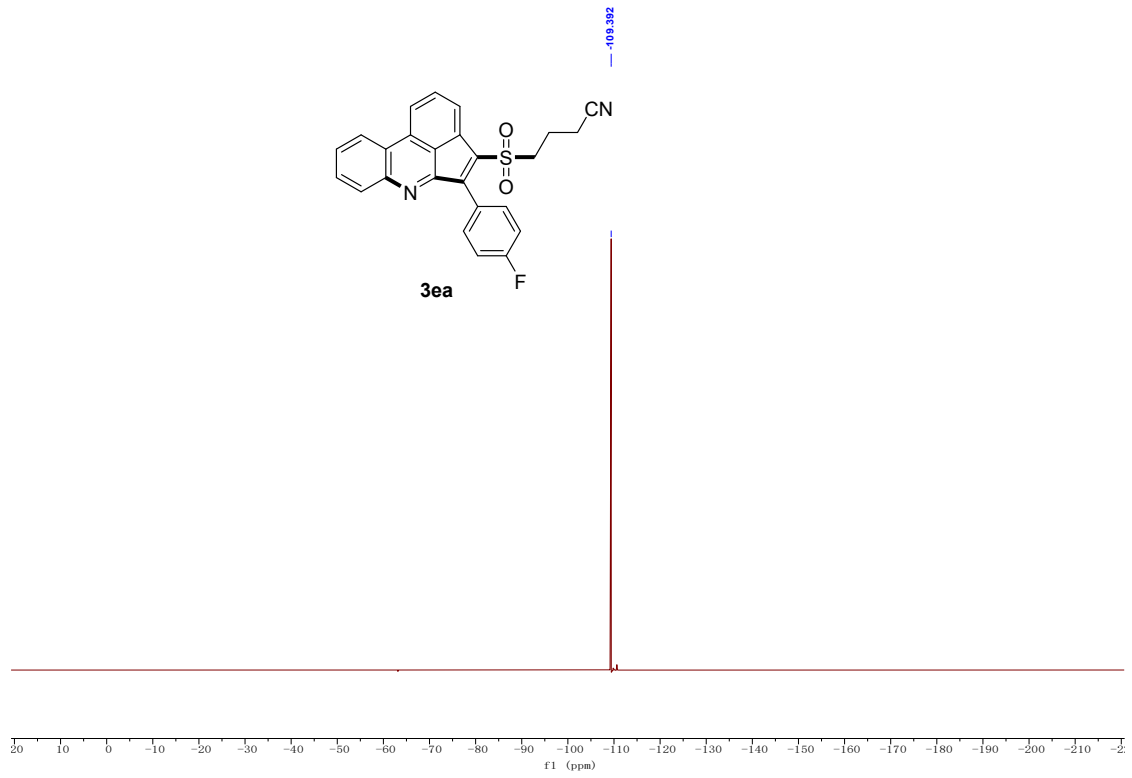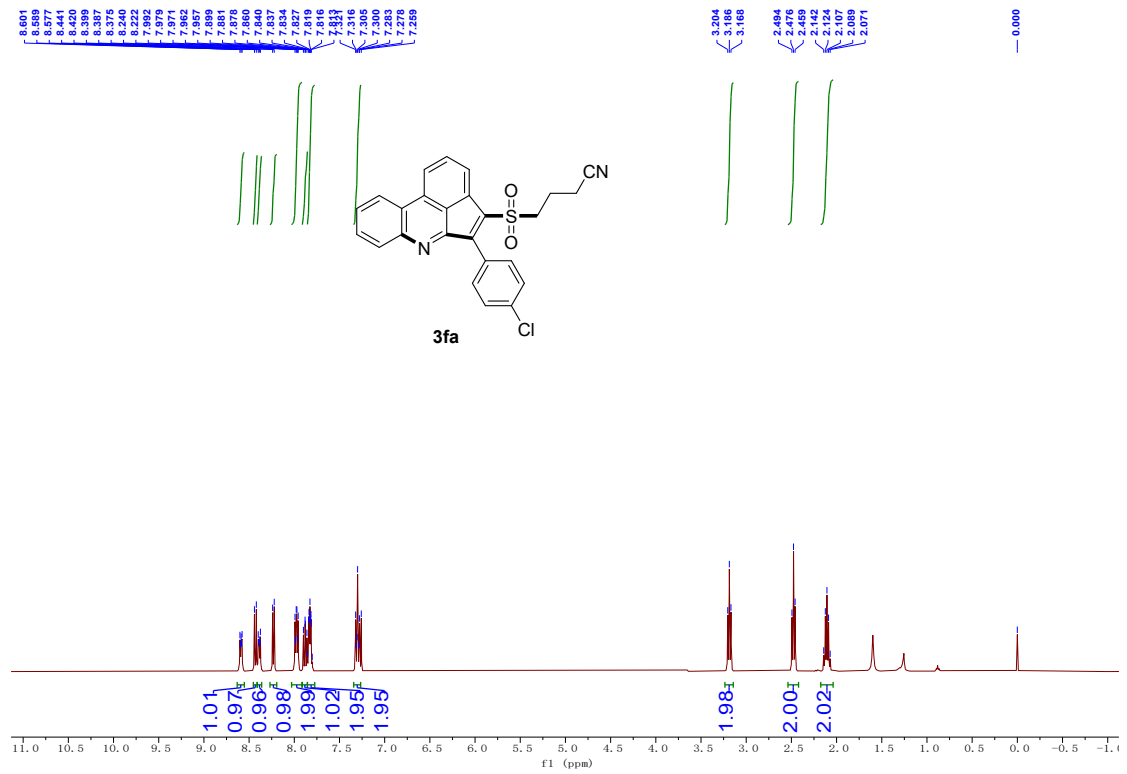

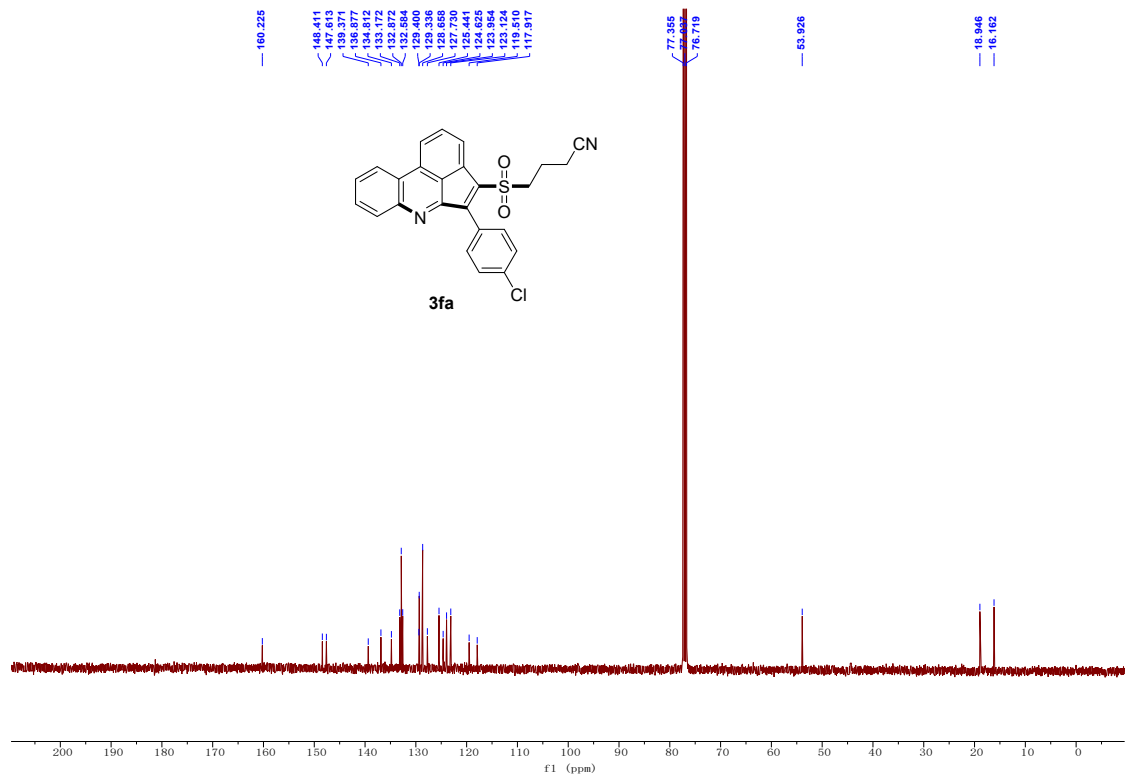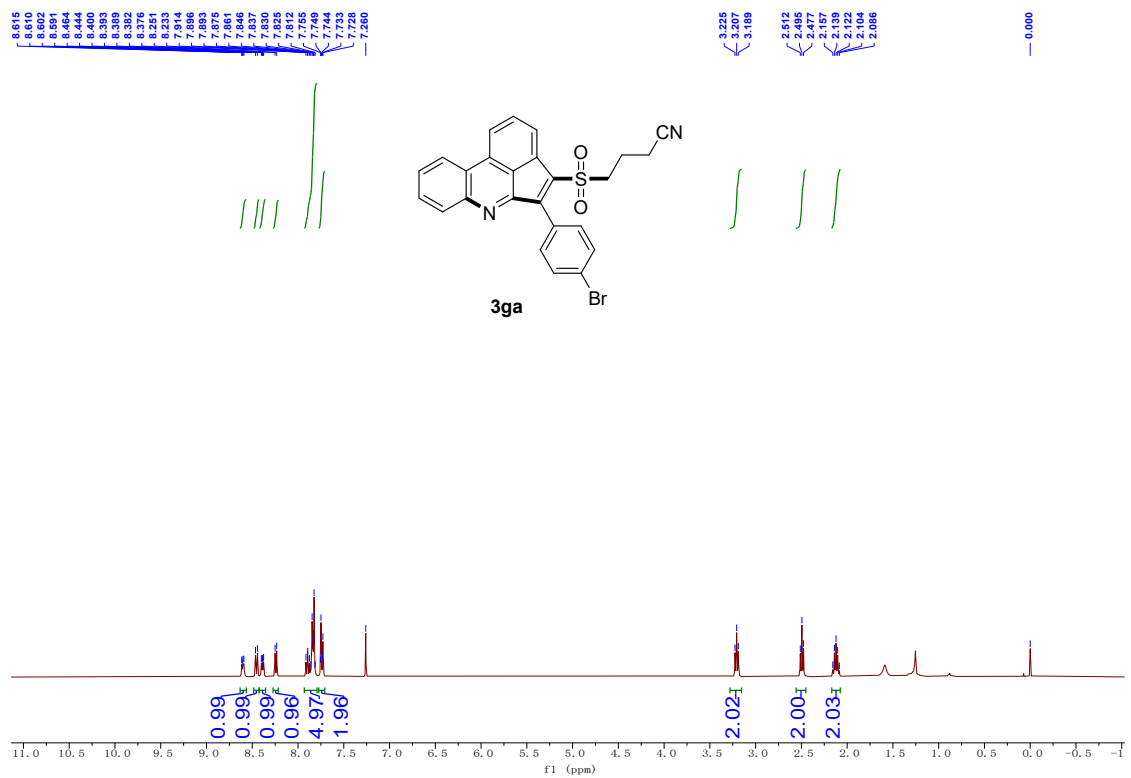



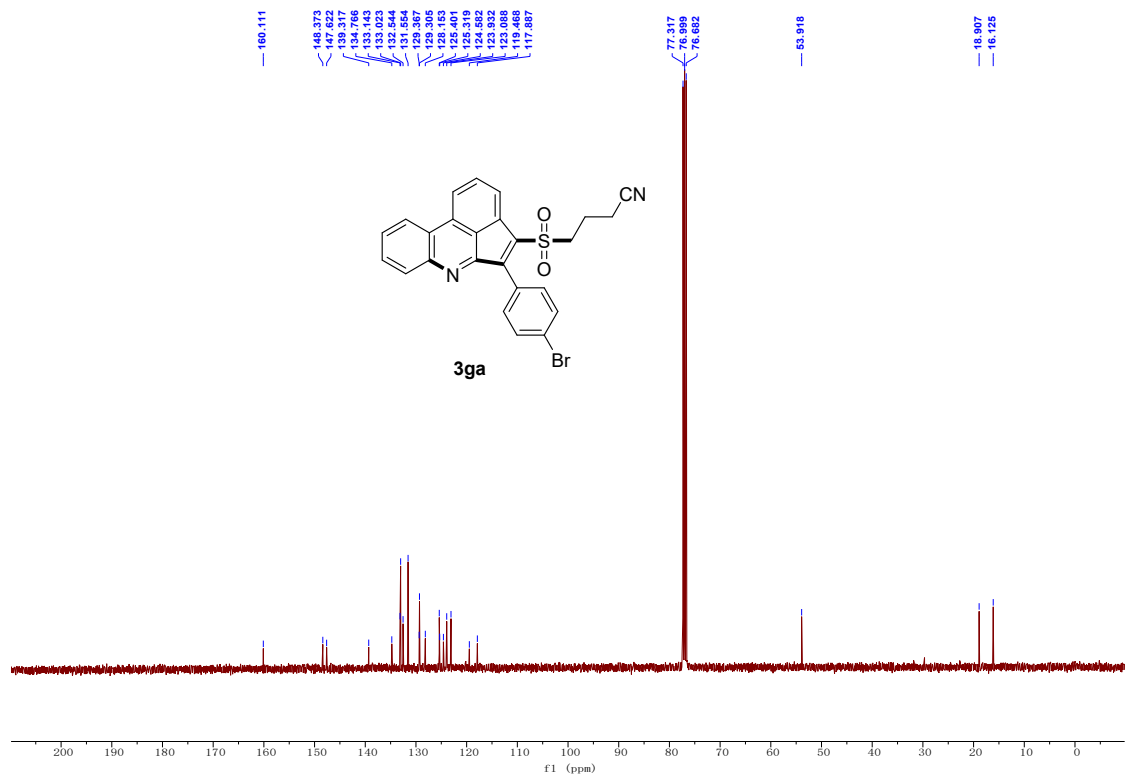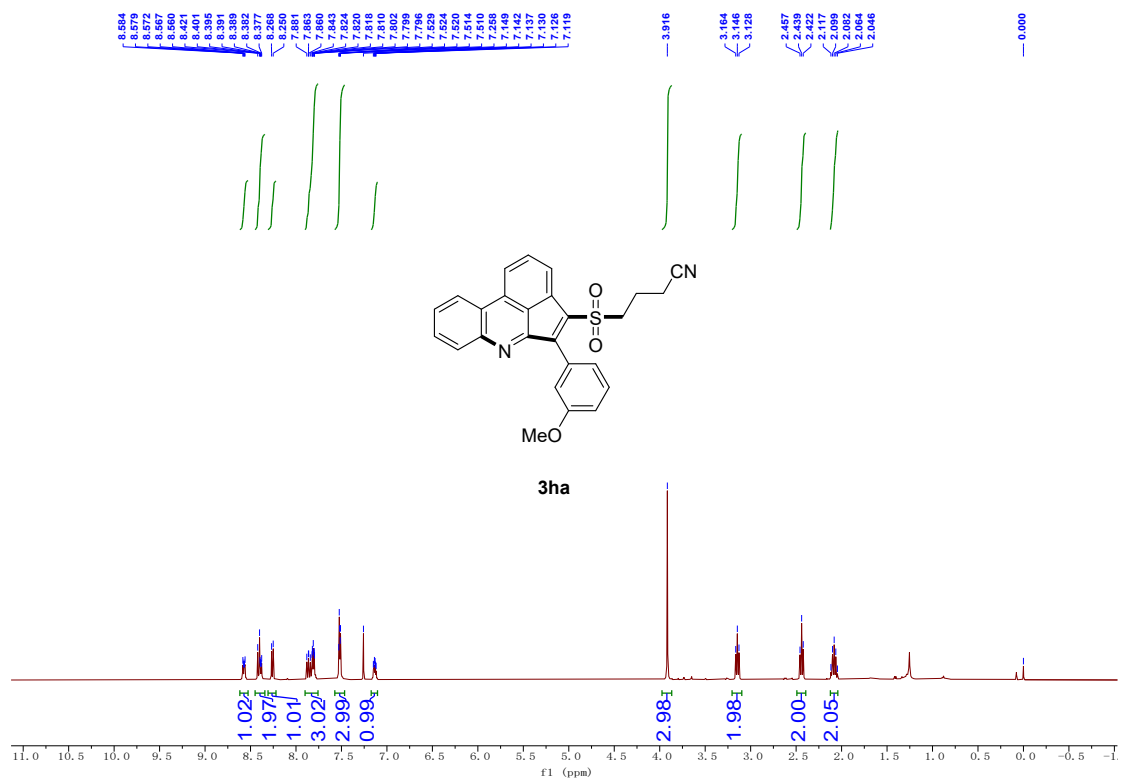

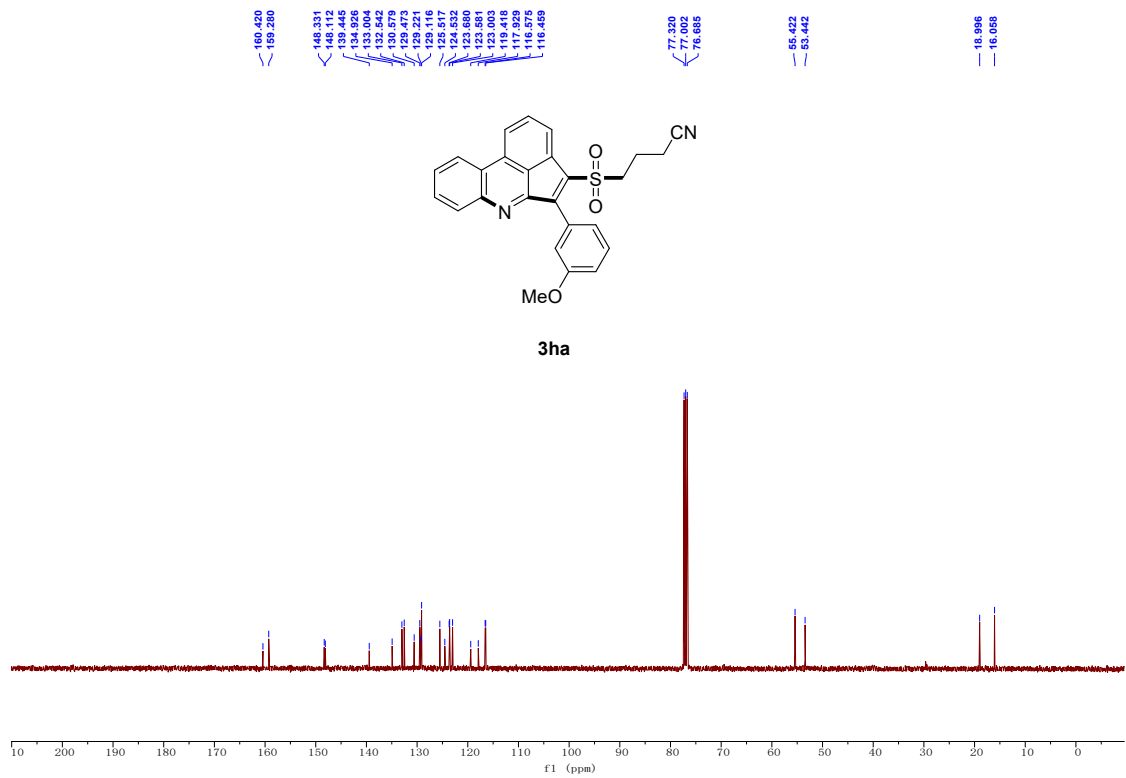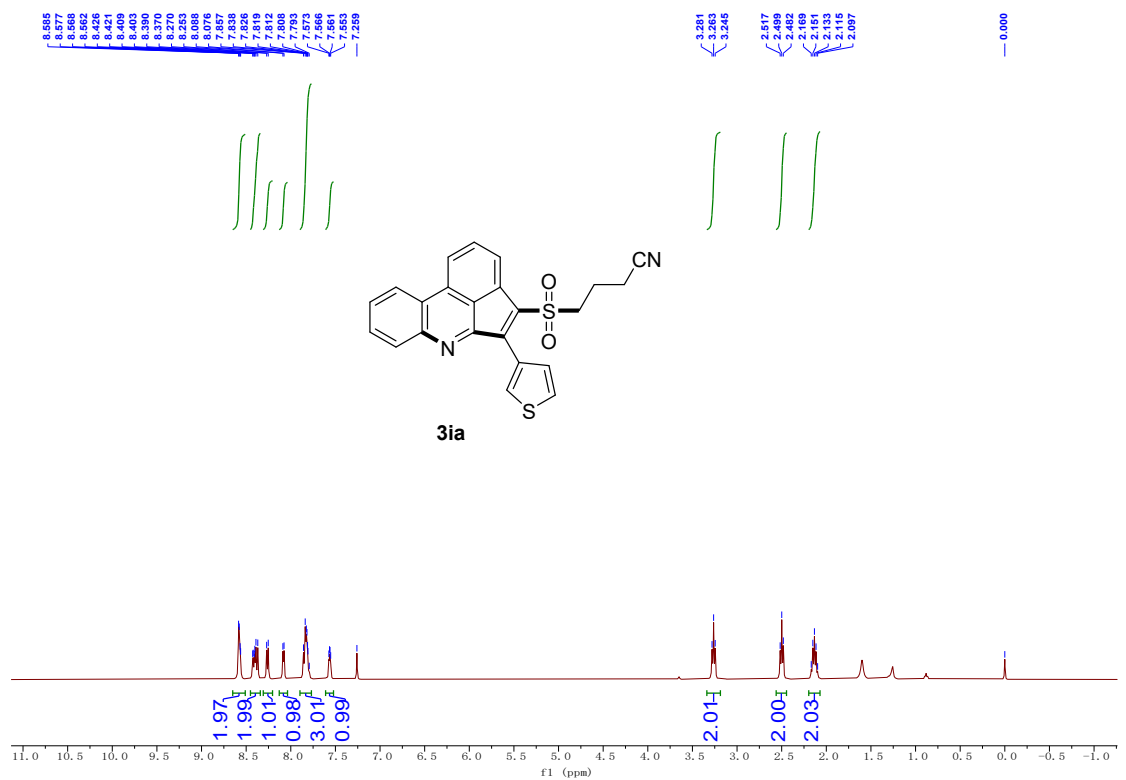

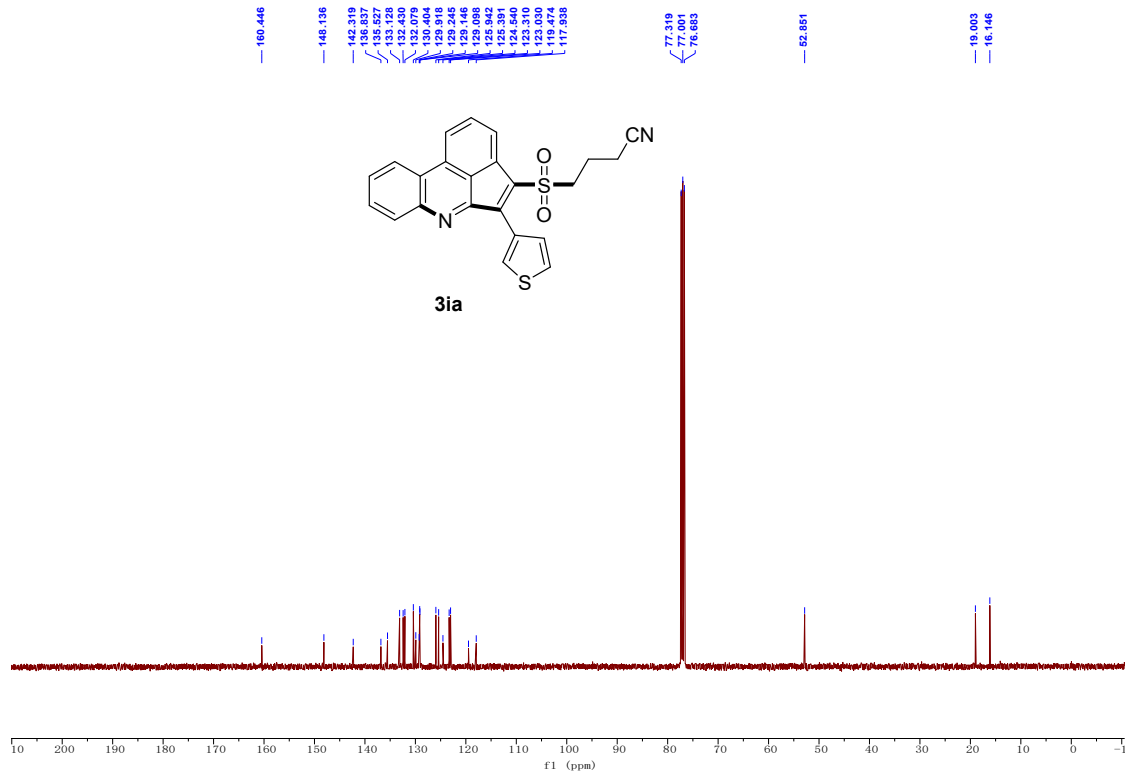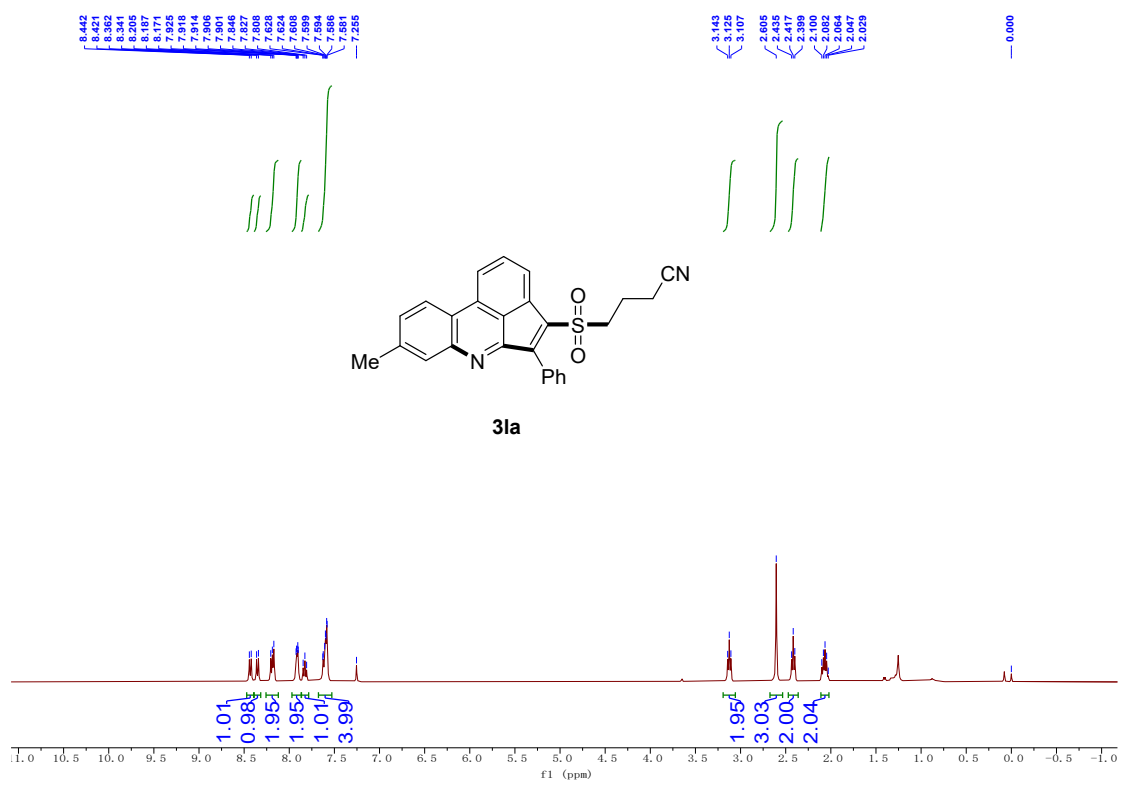

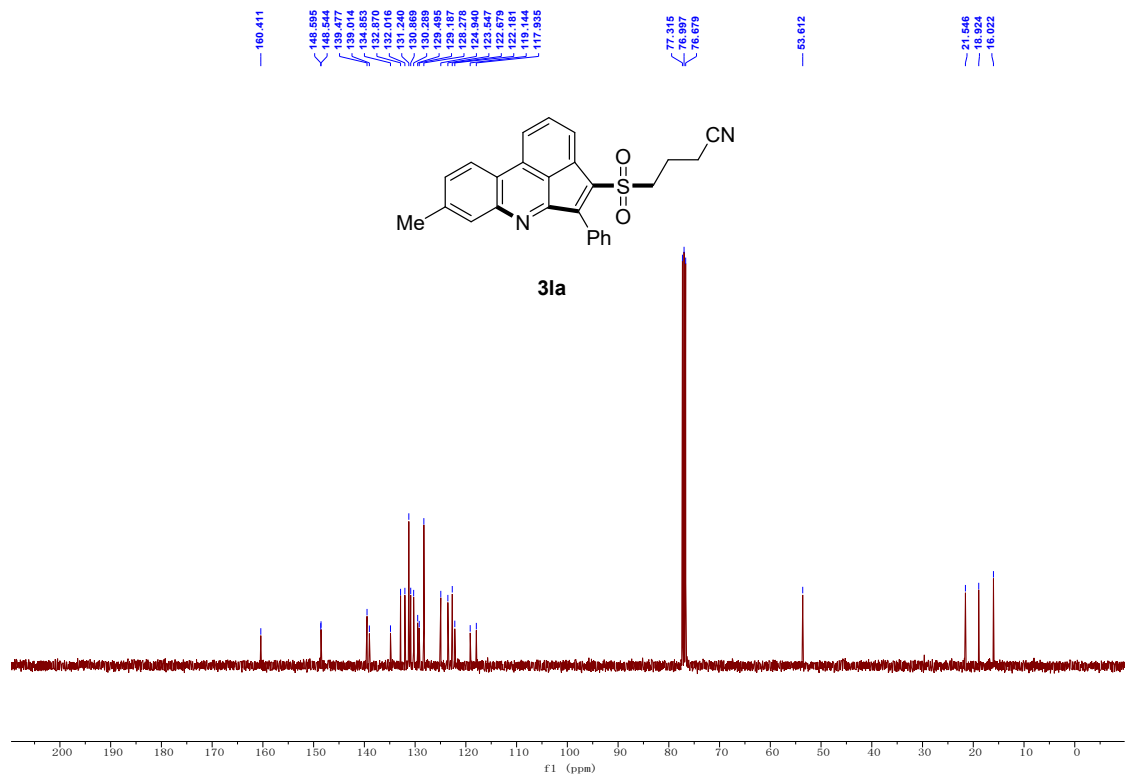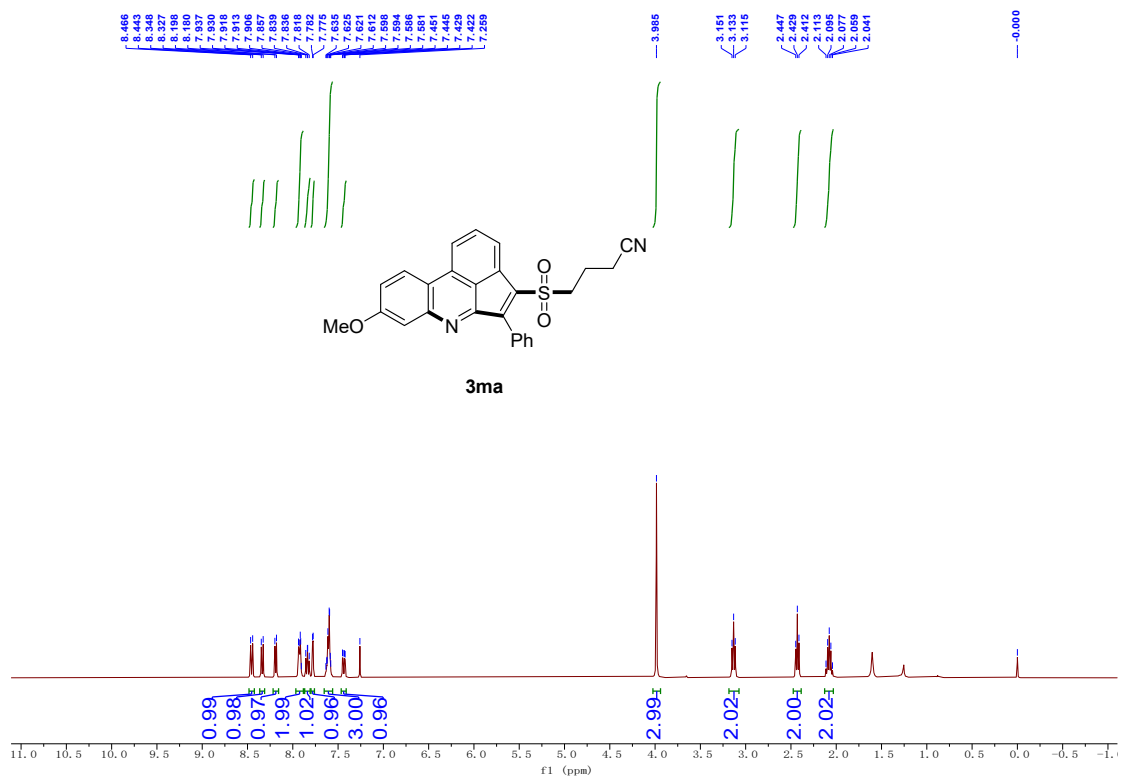

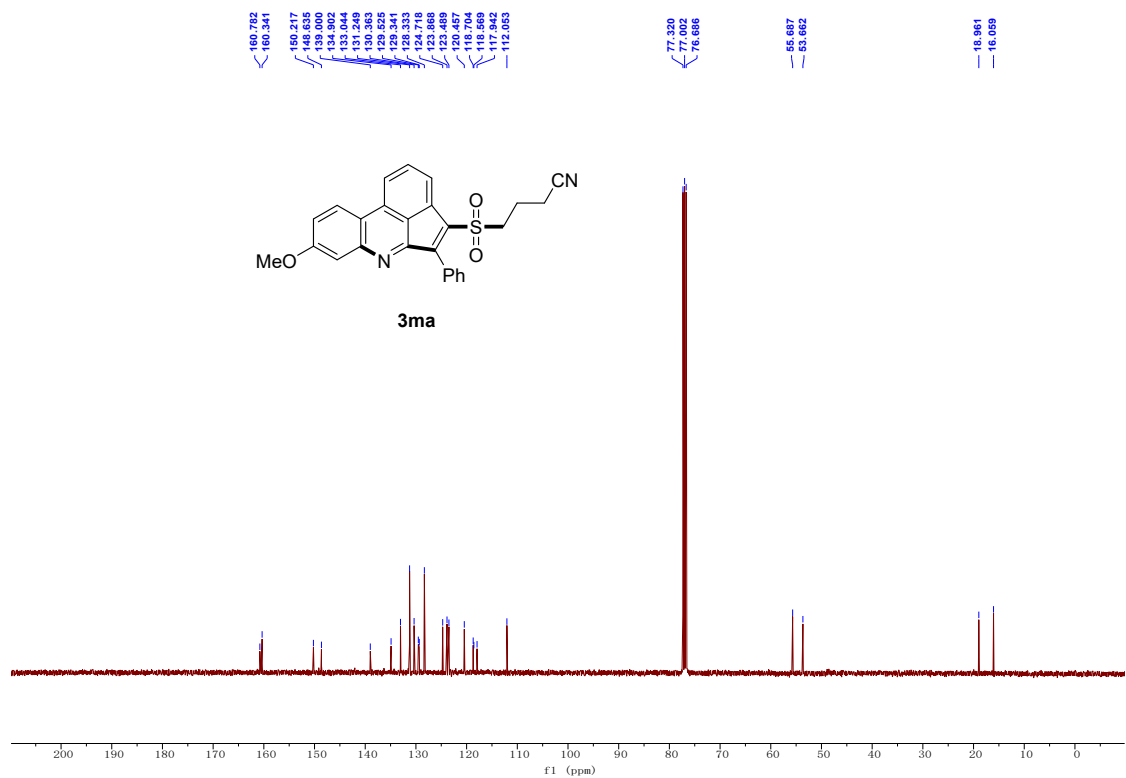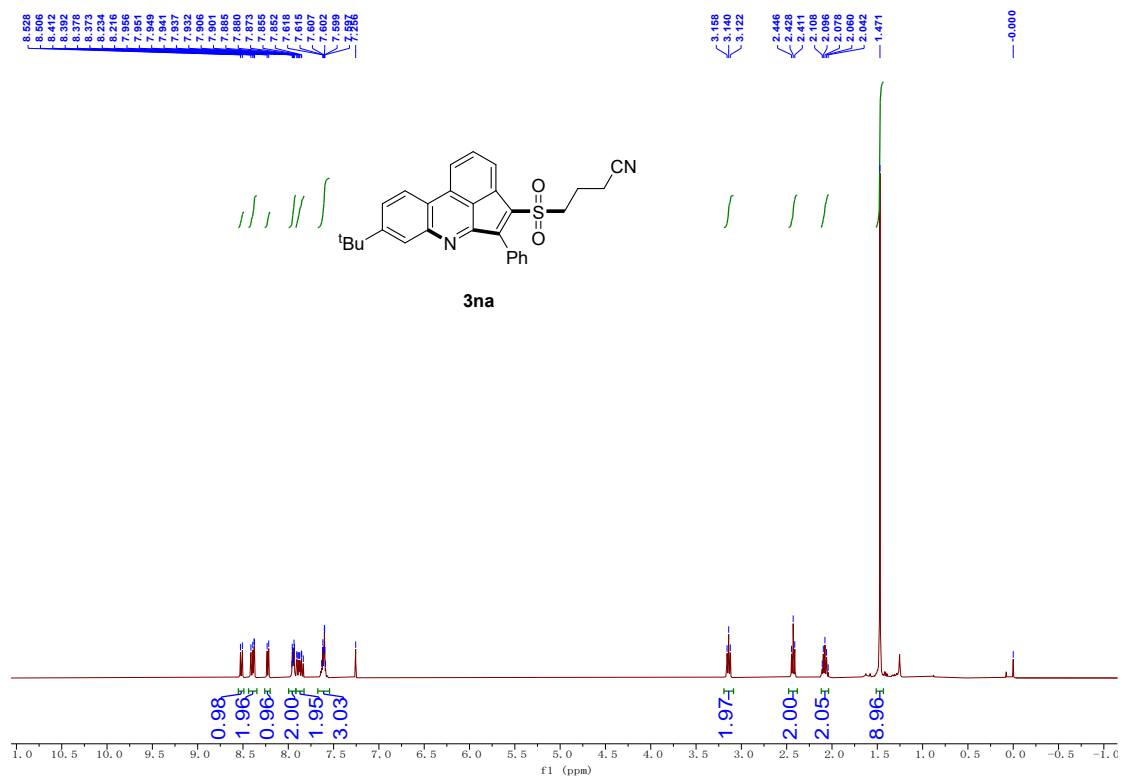

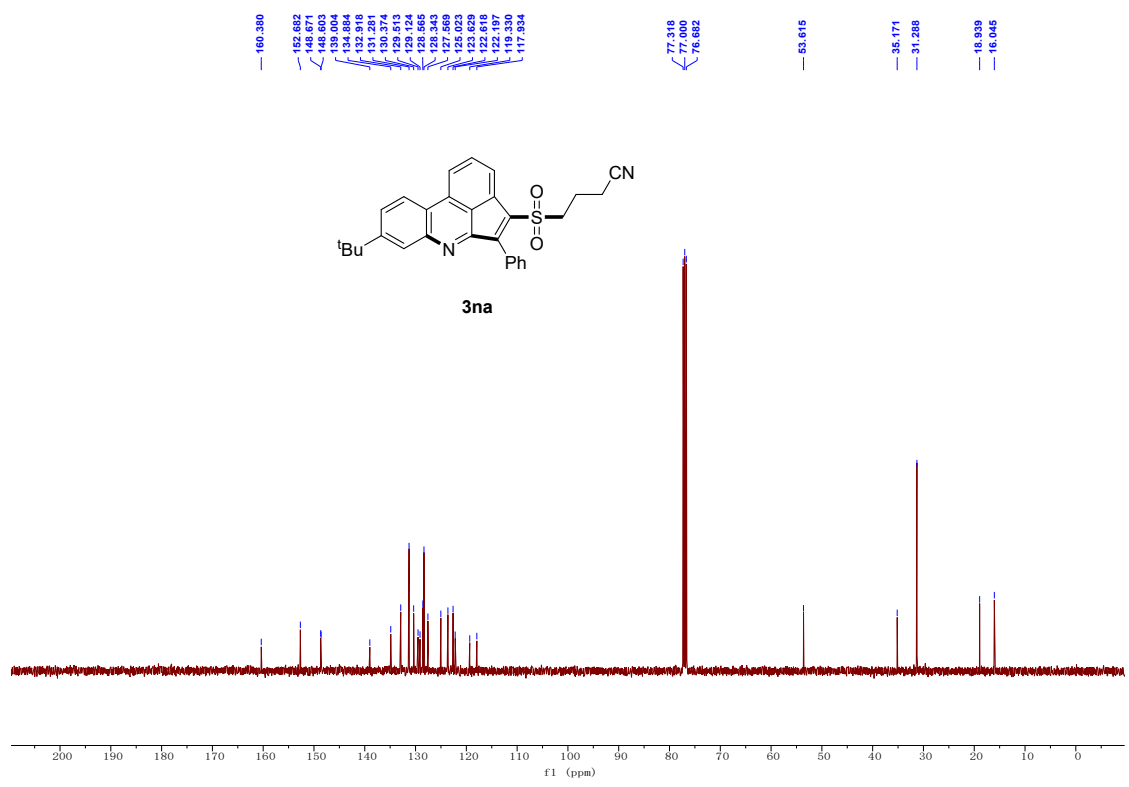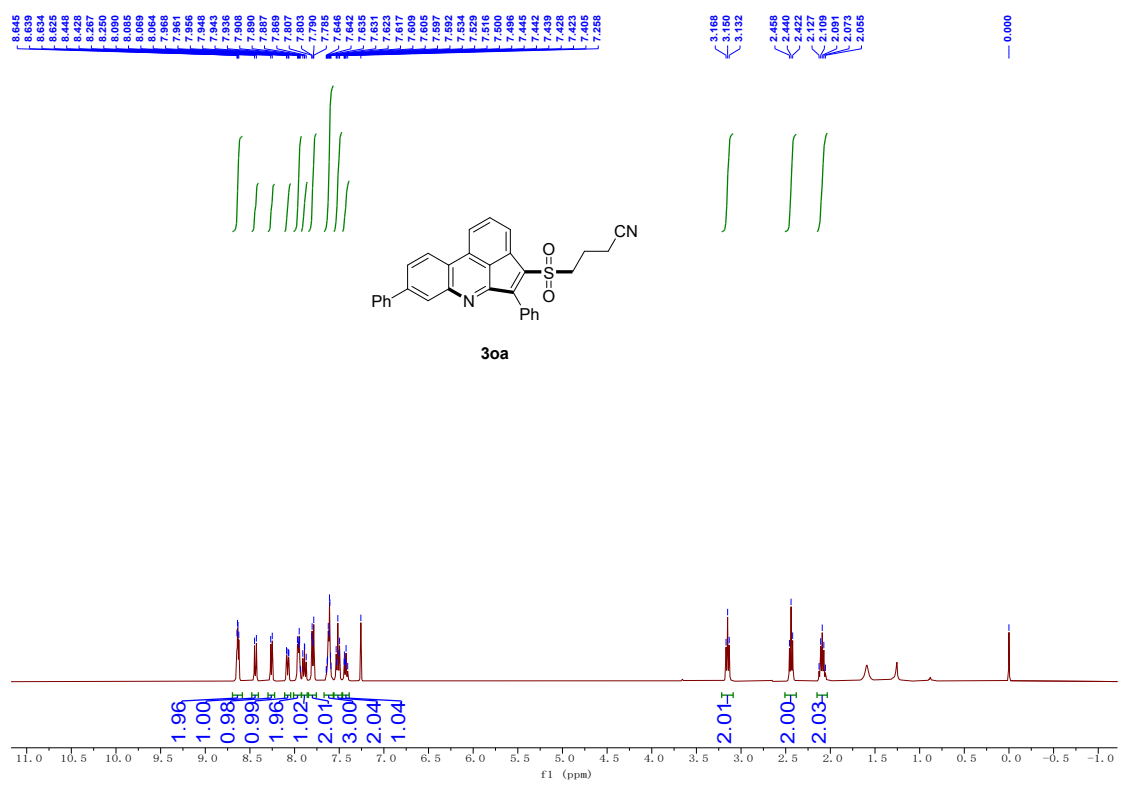

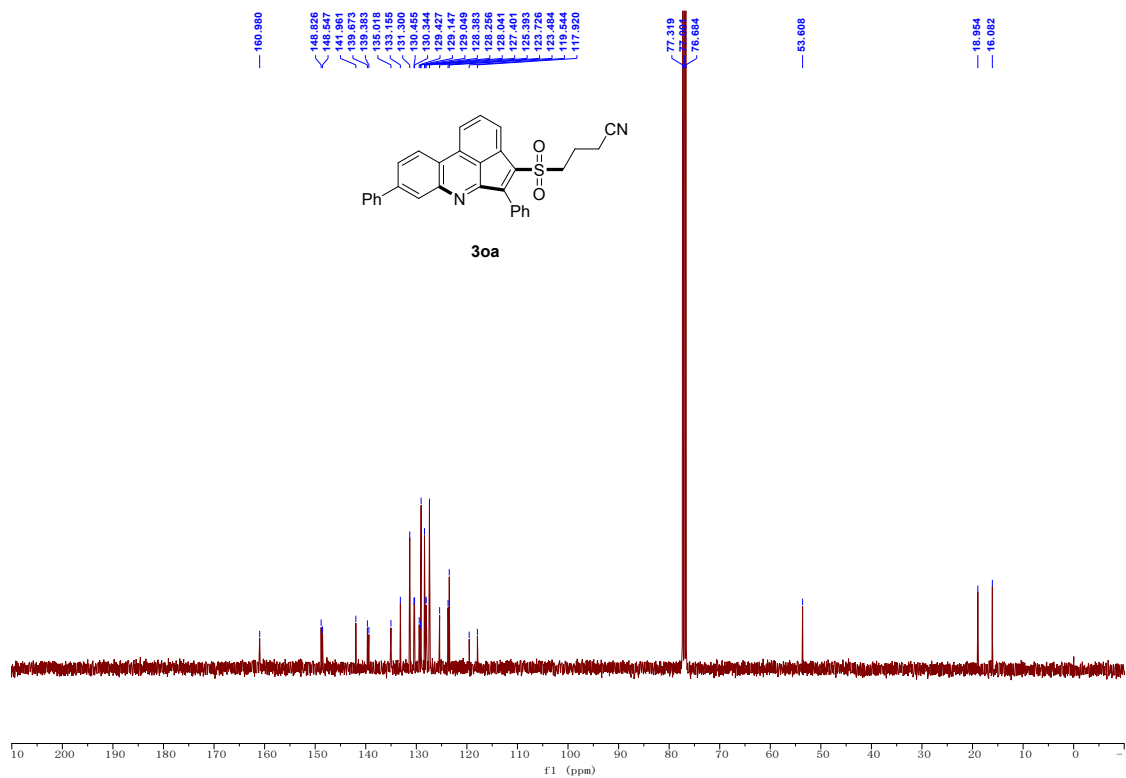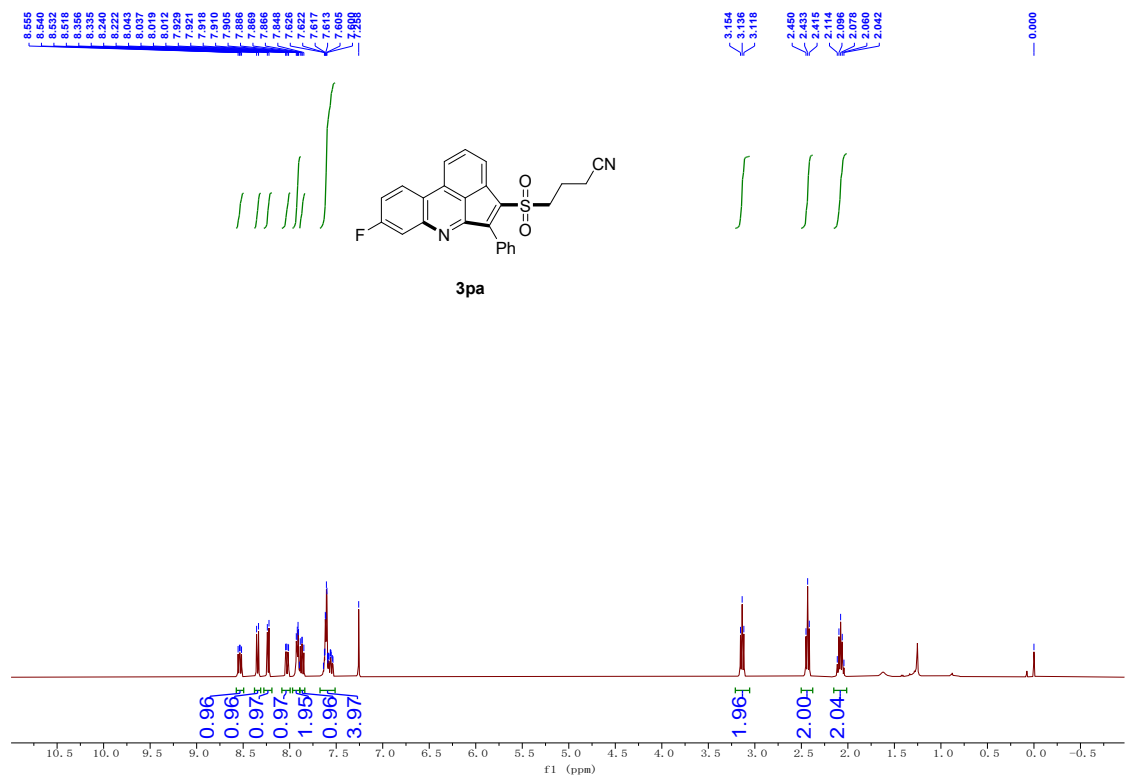

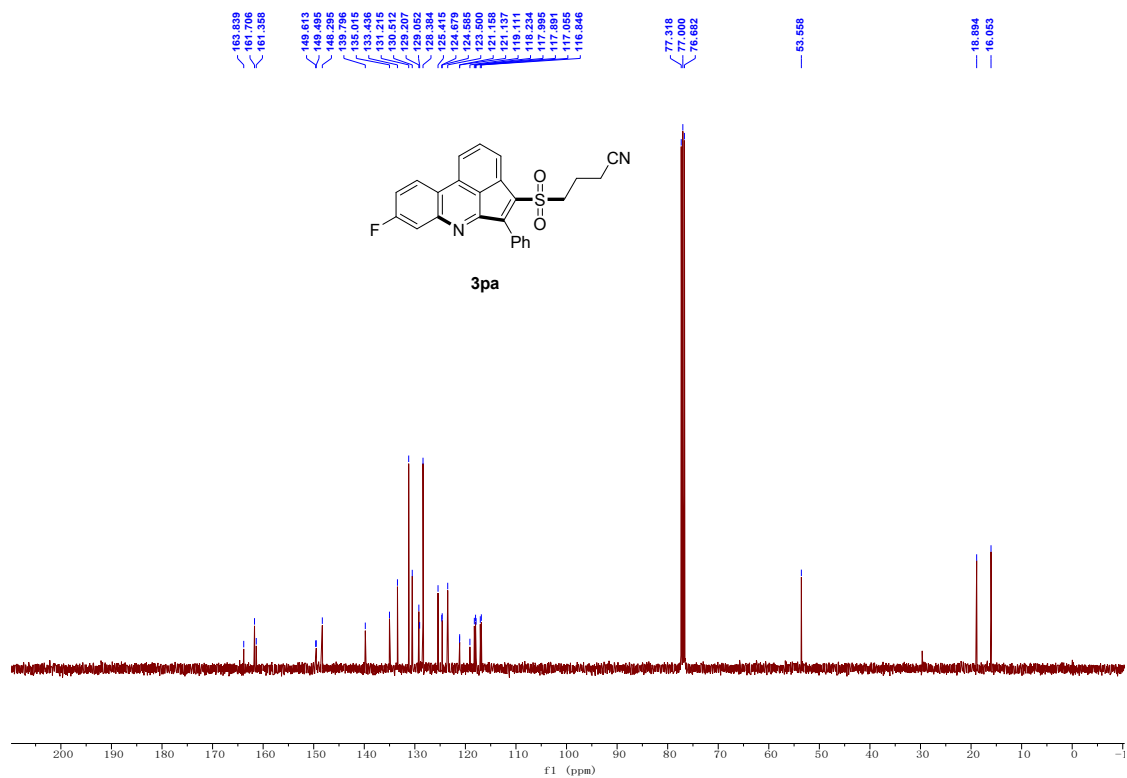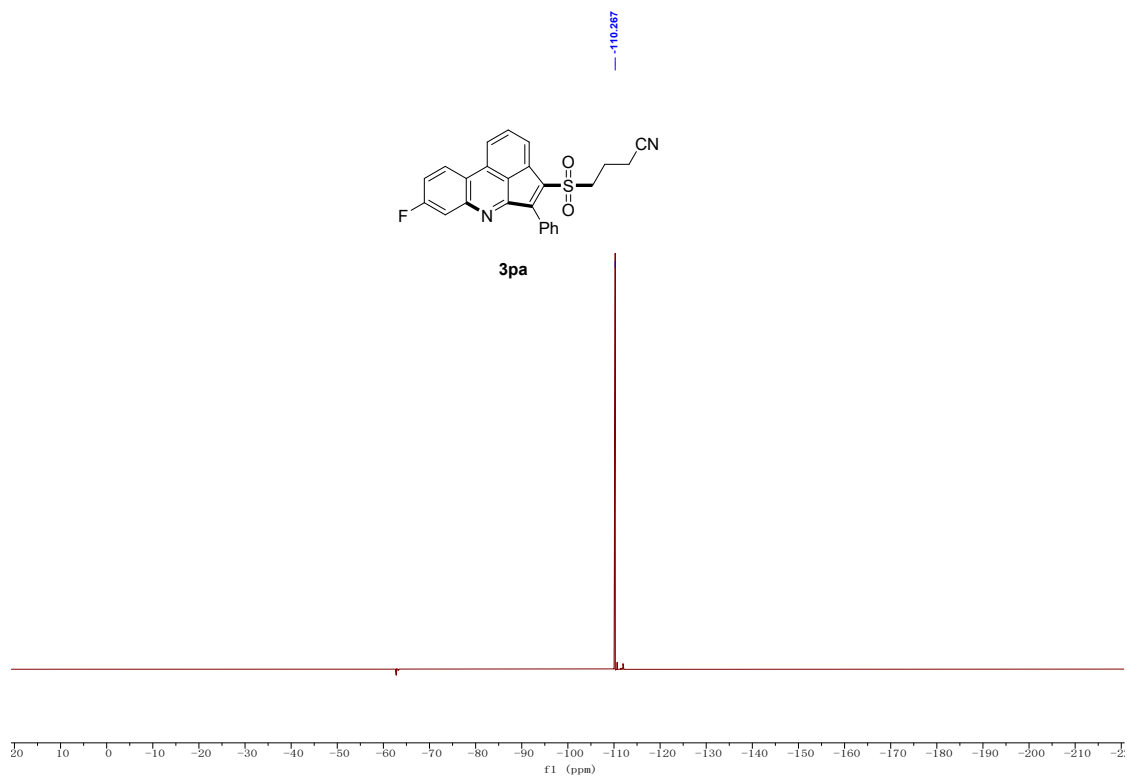



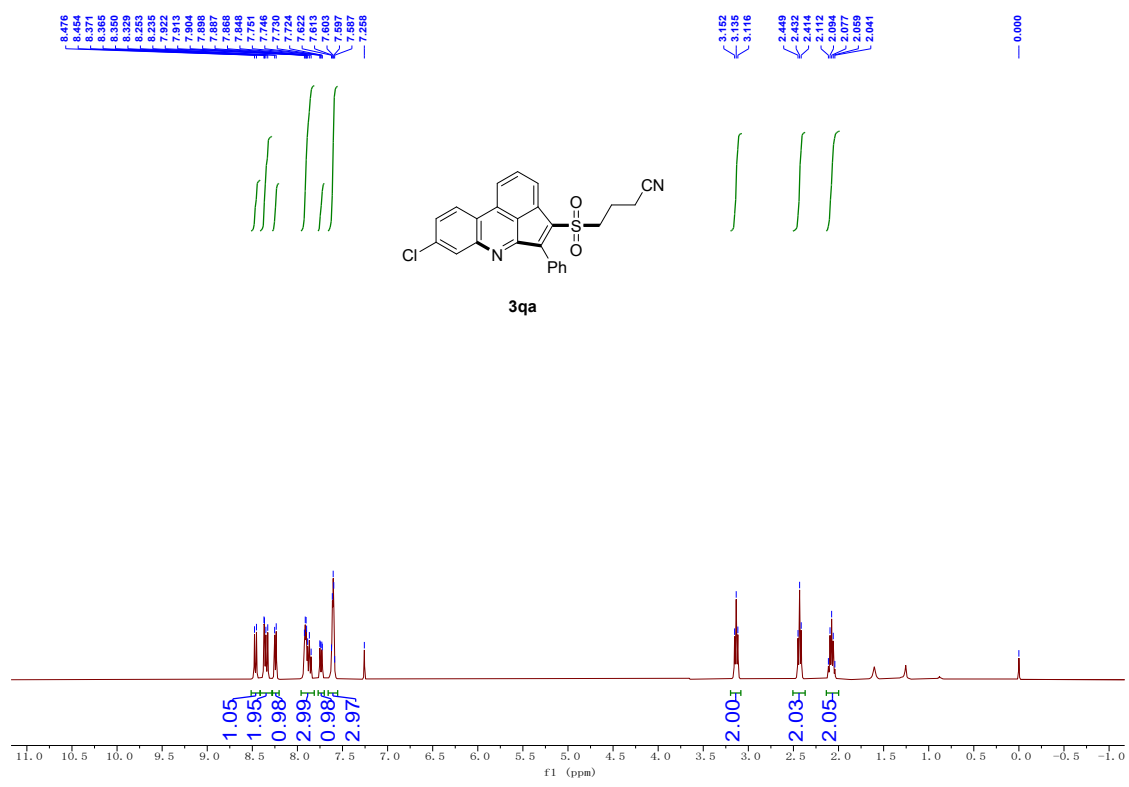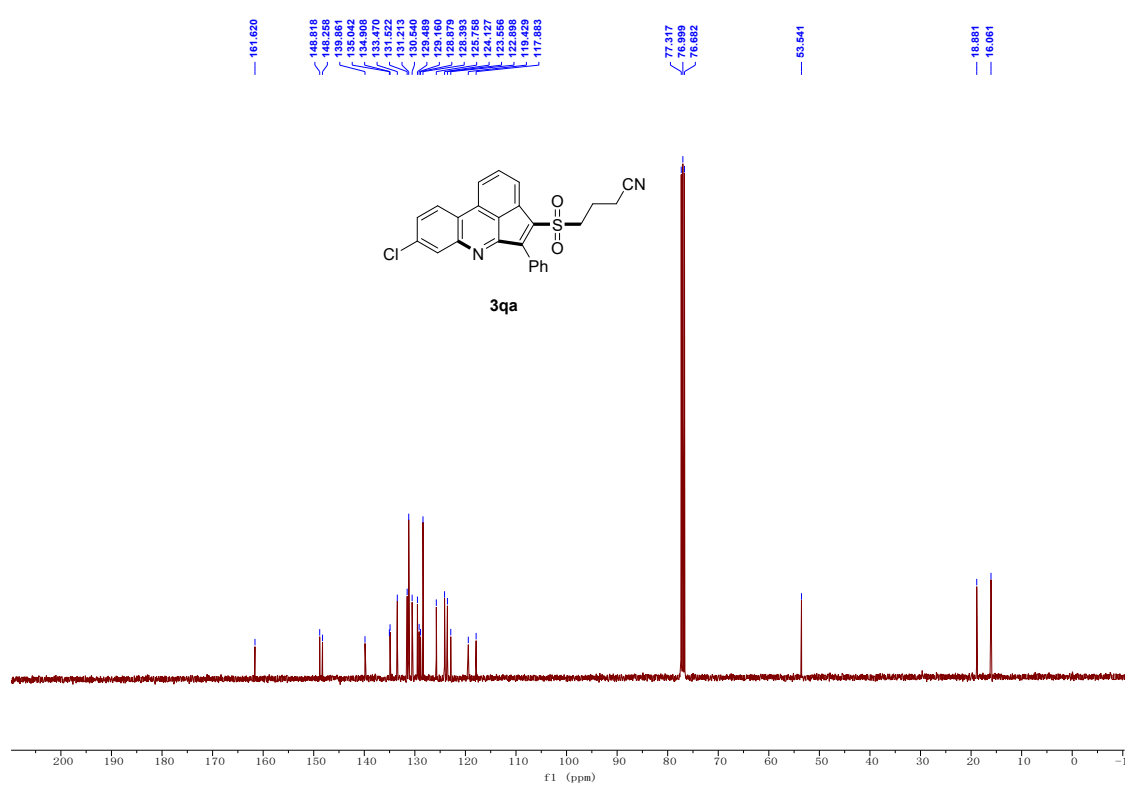

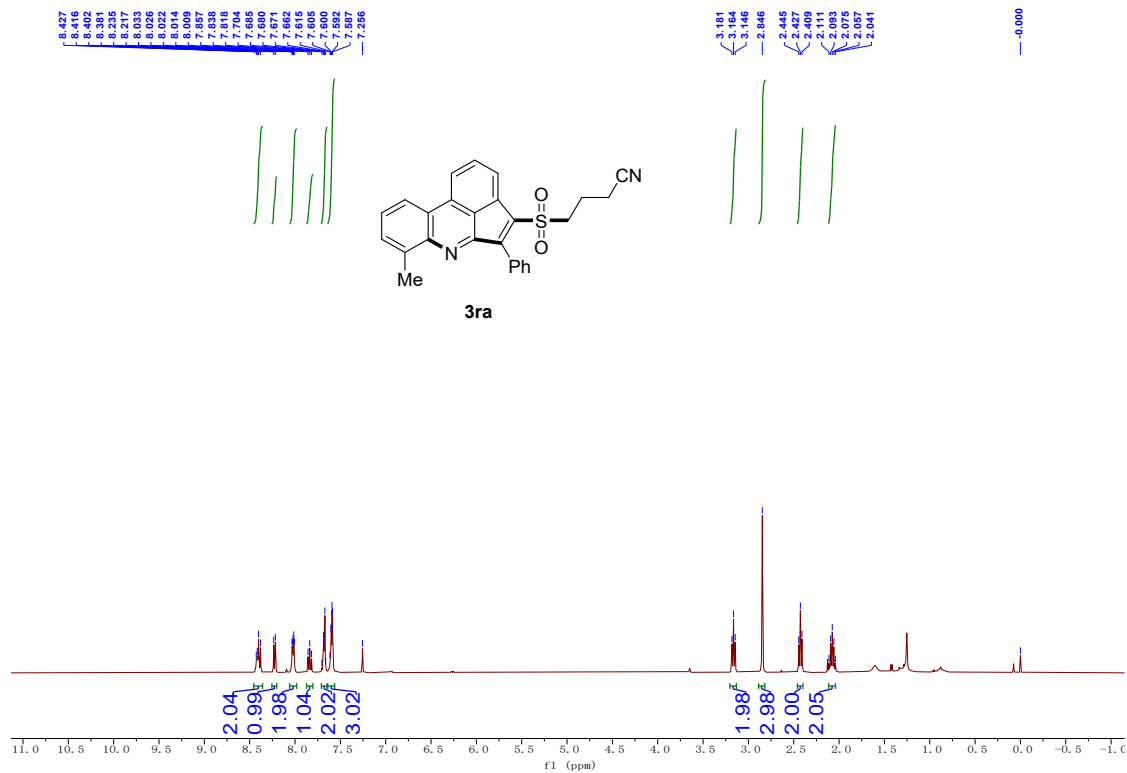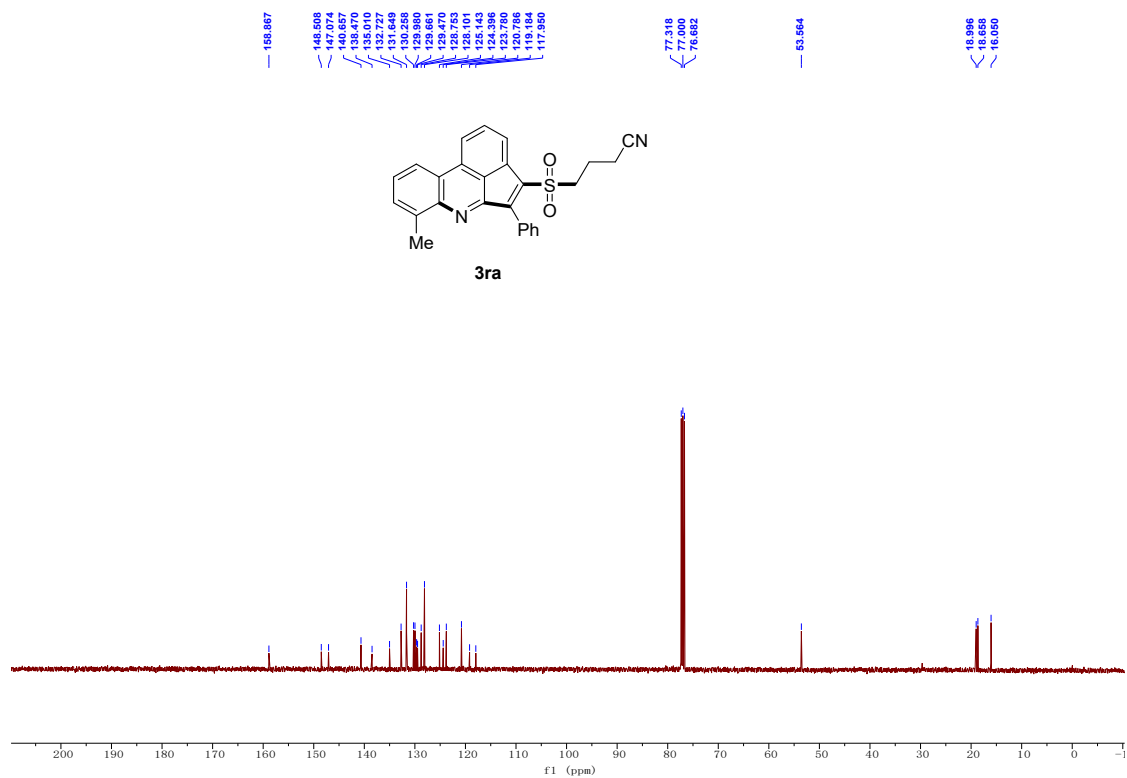

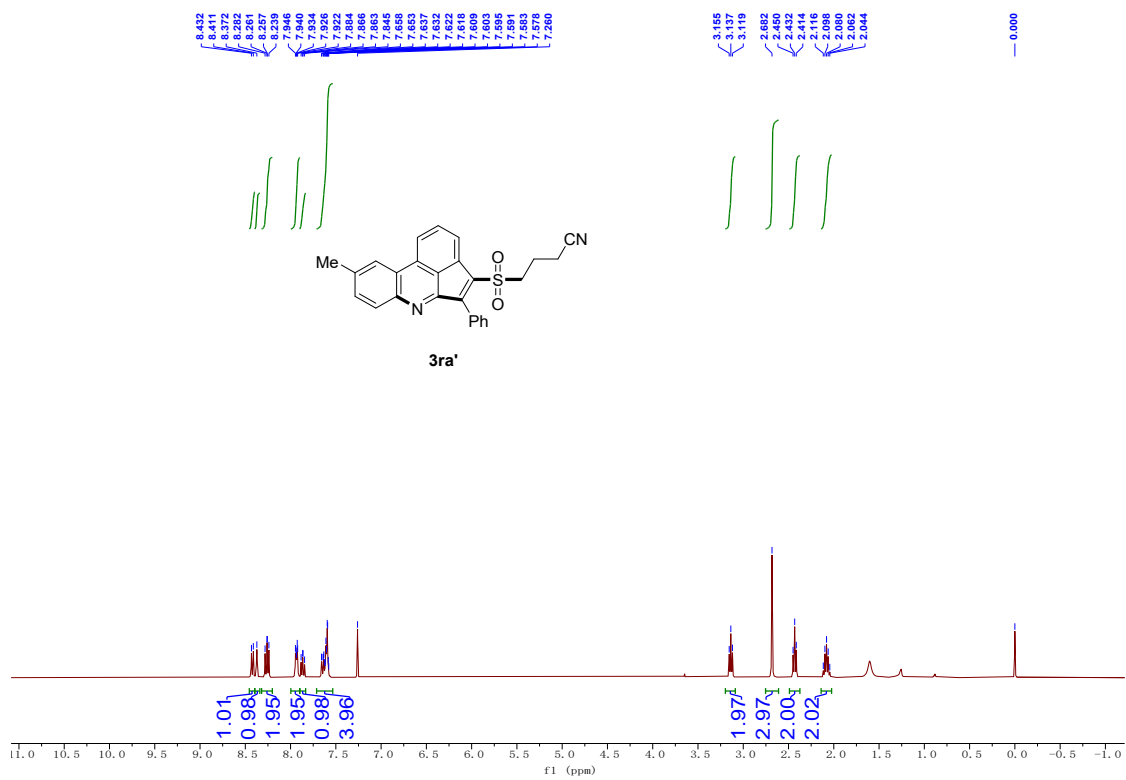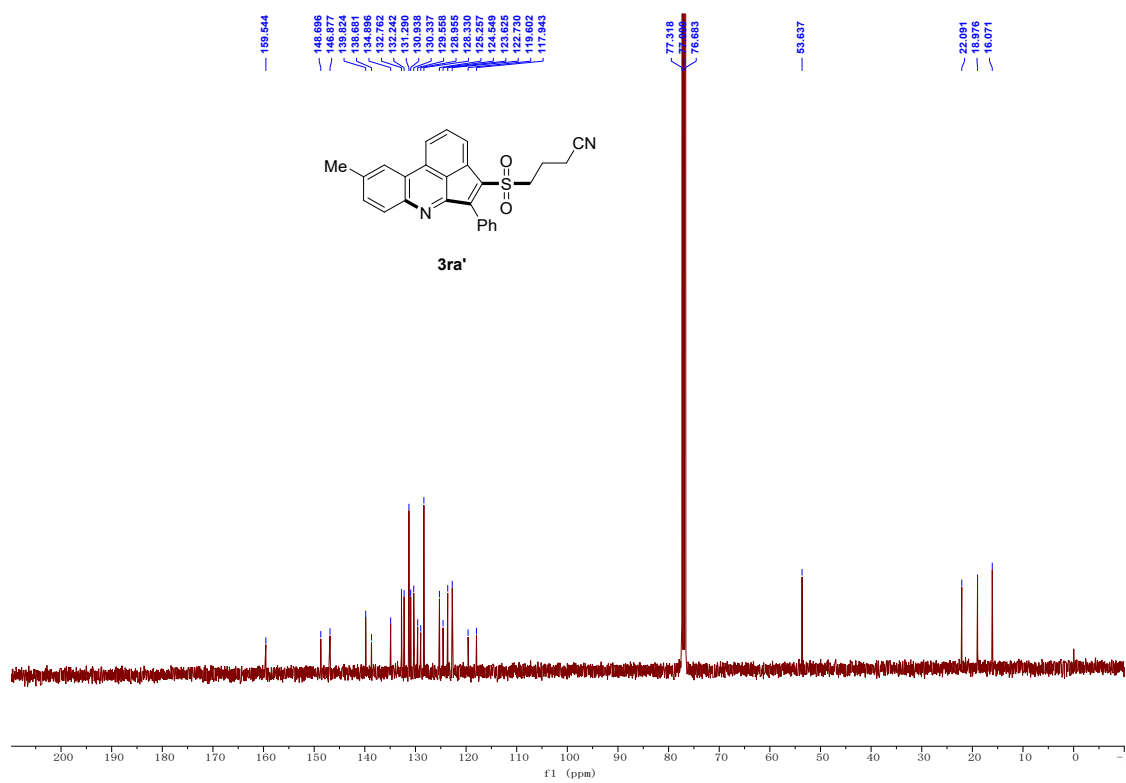

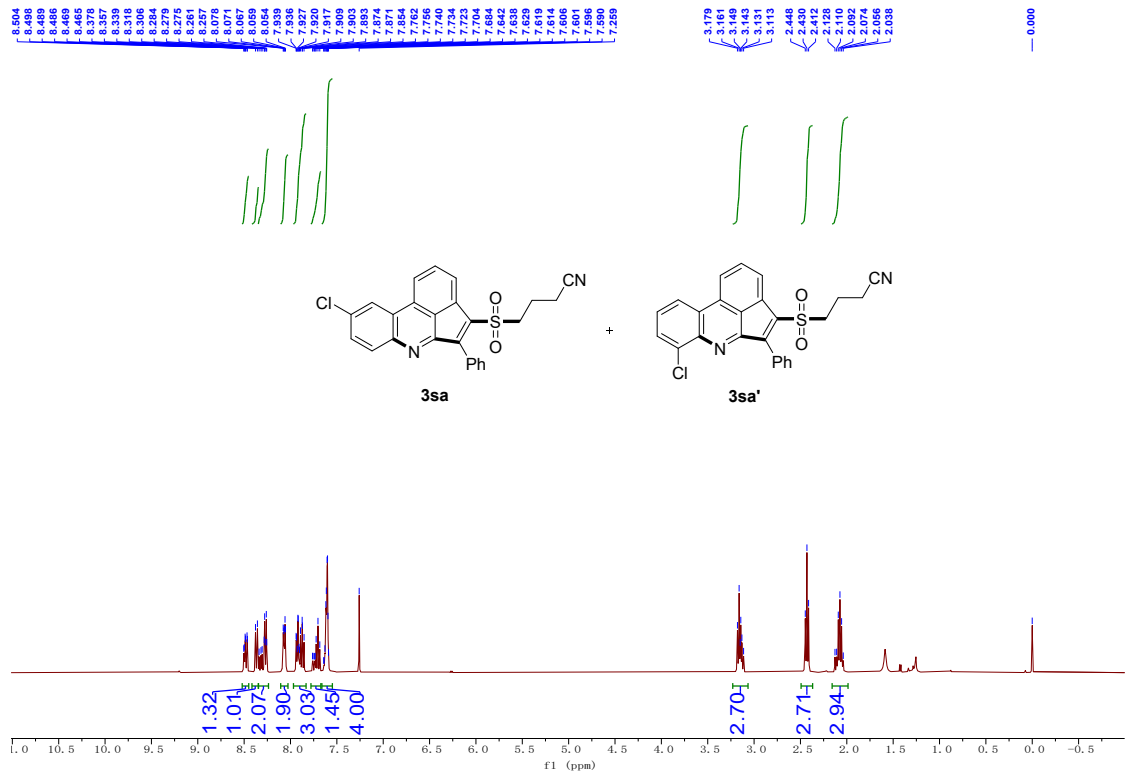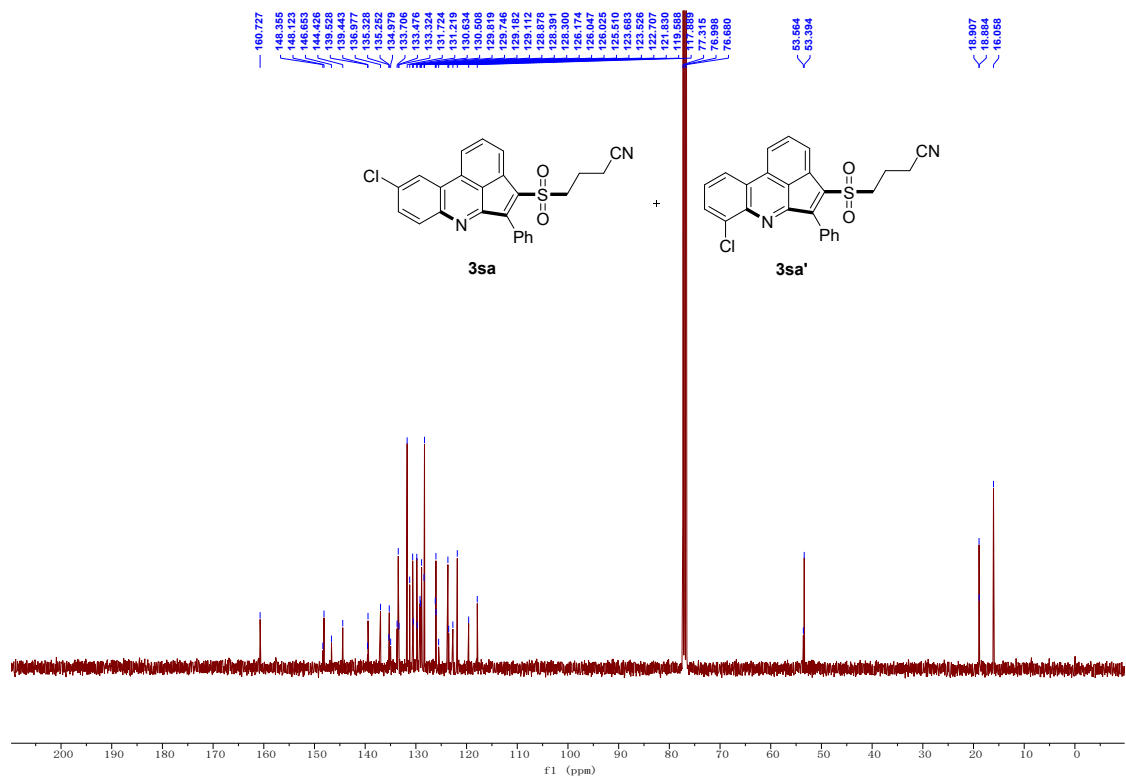

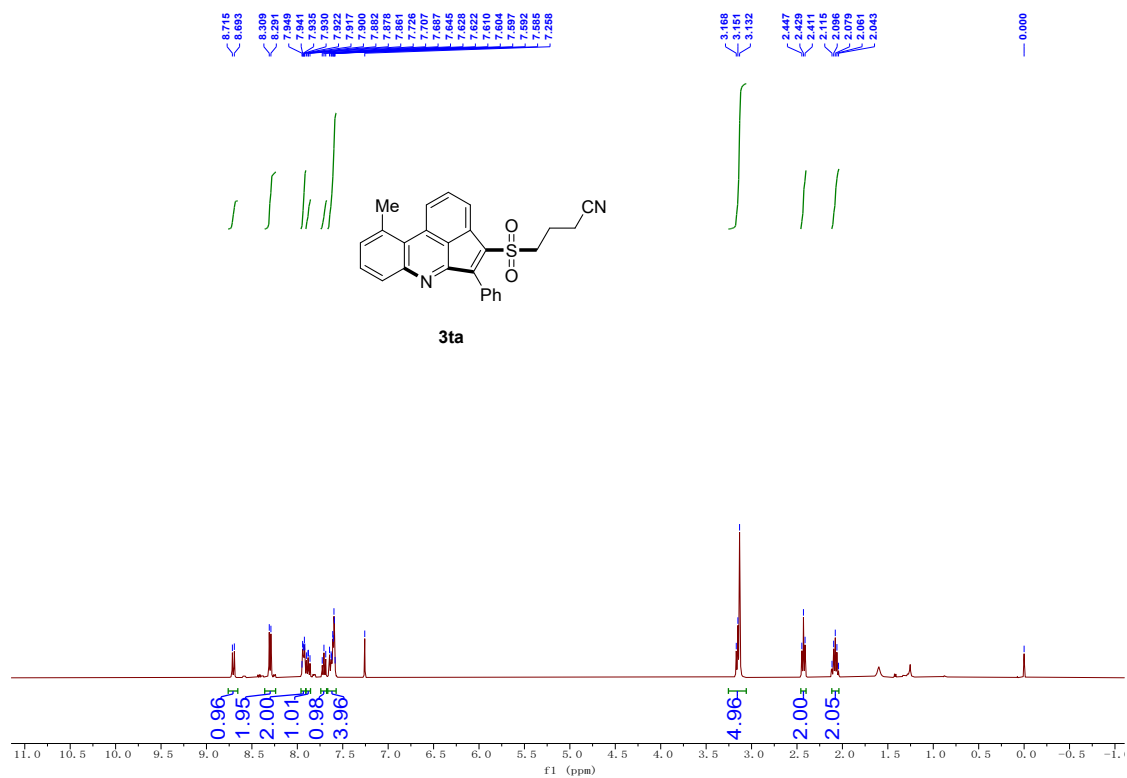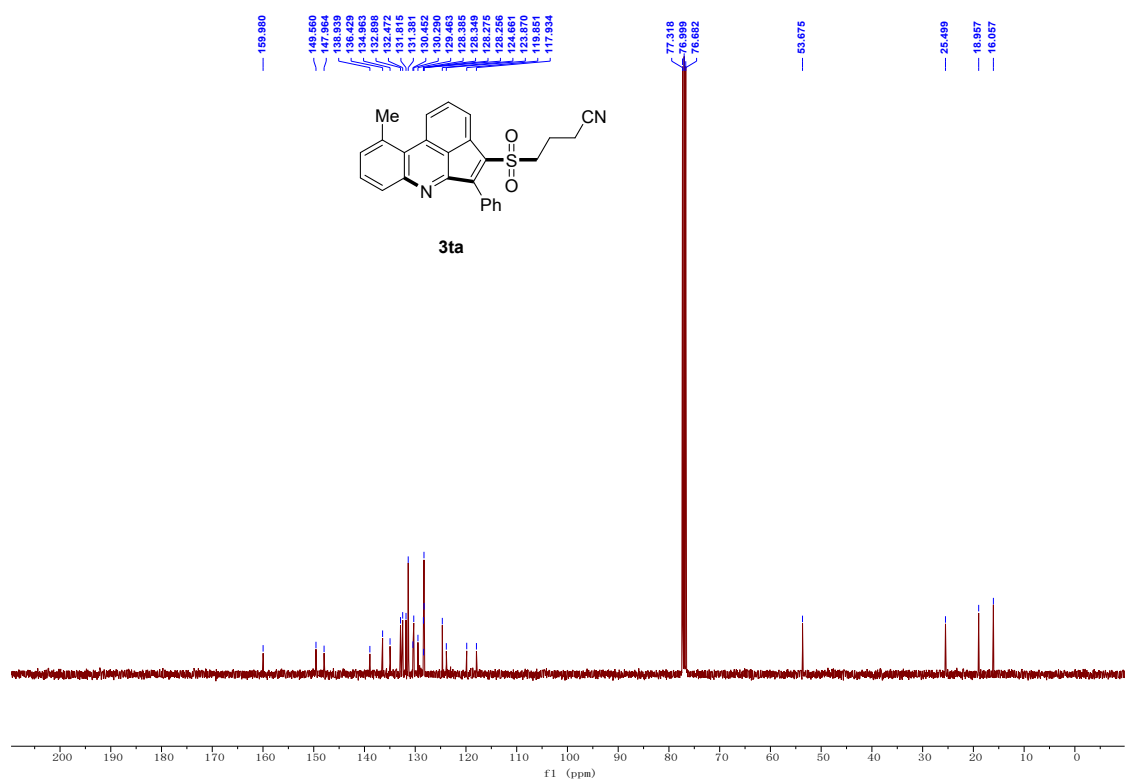

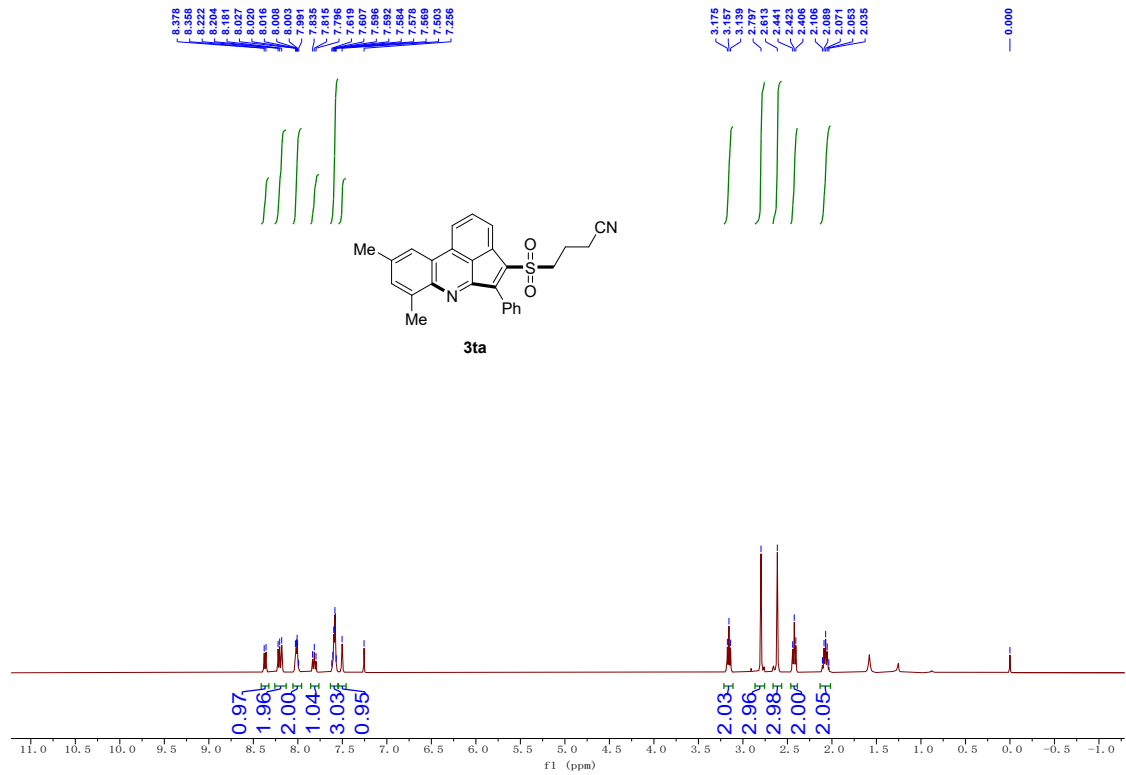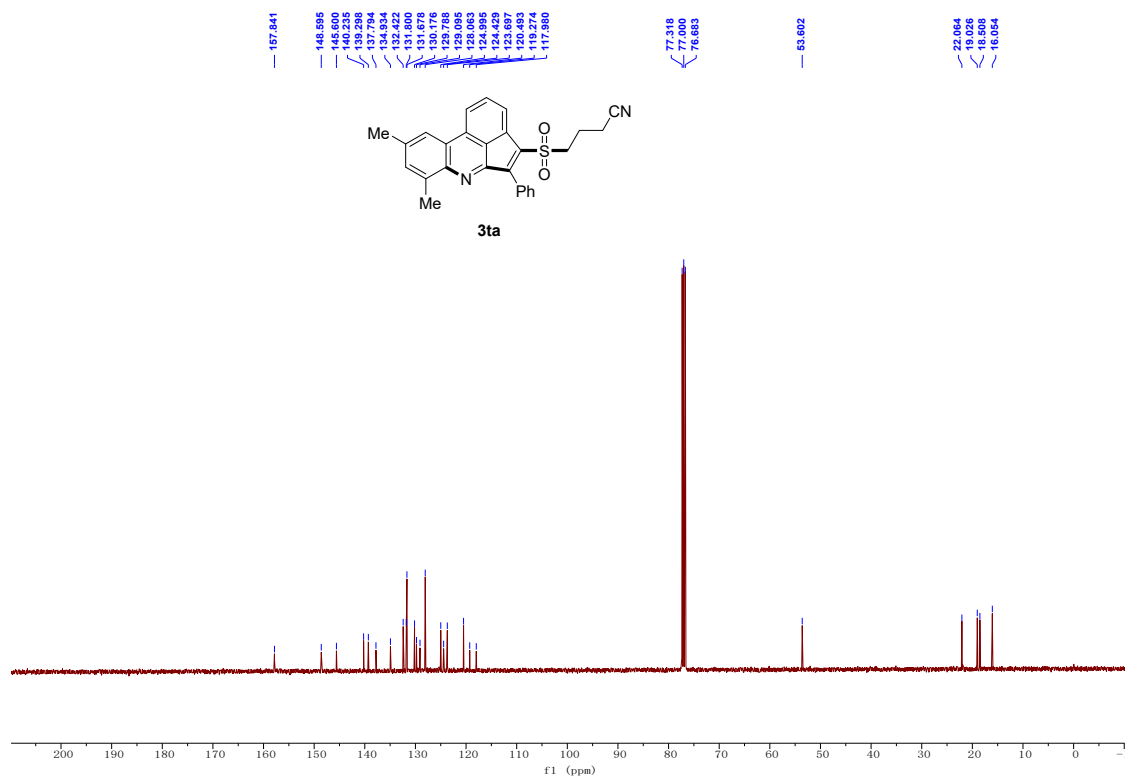

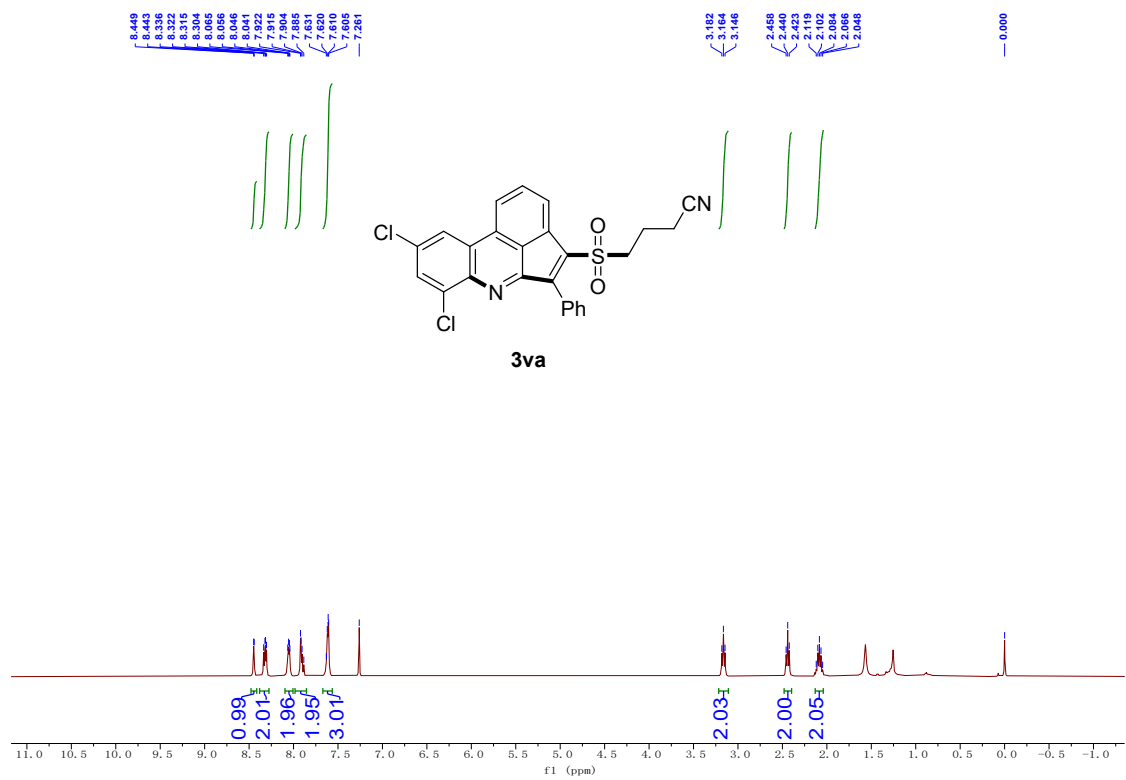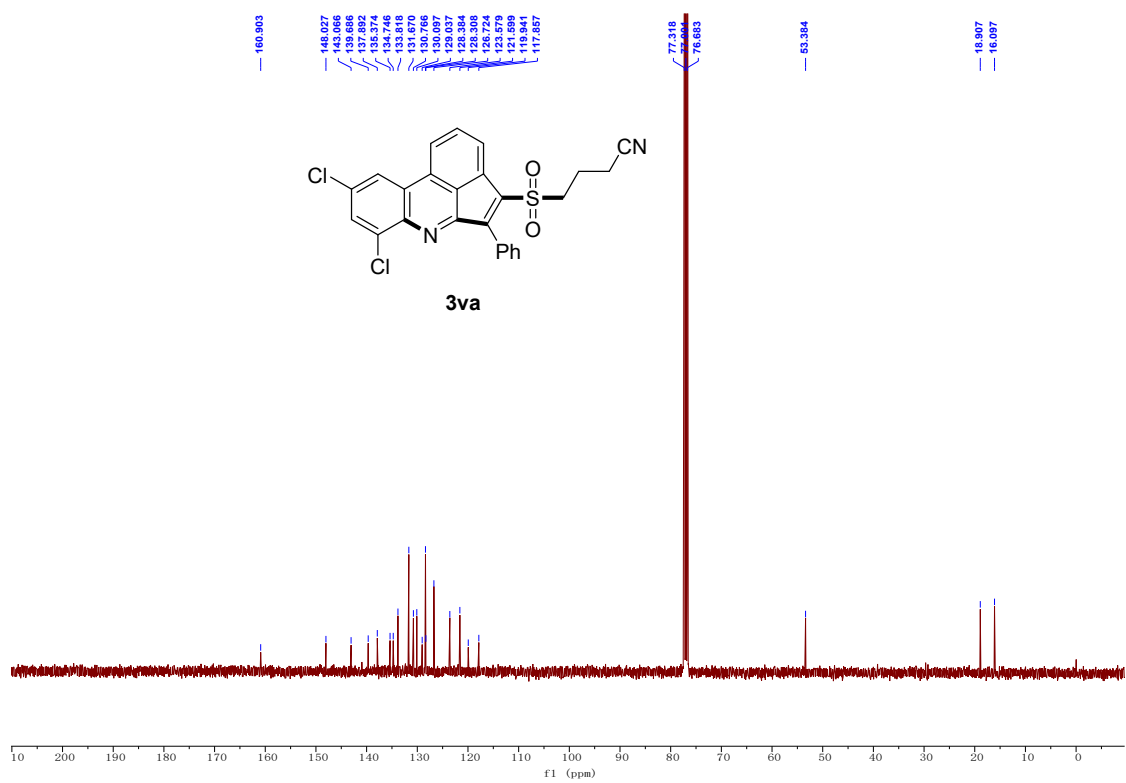

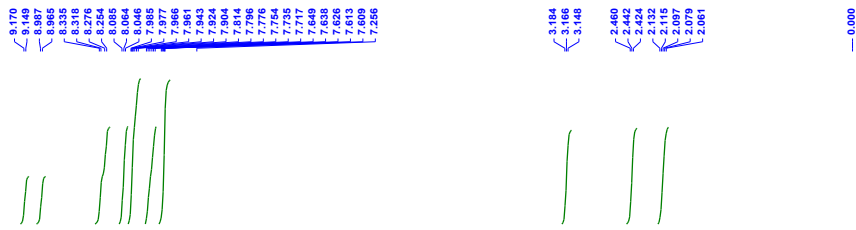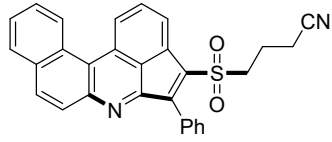

3wa

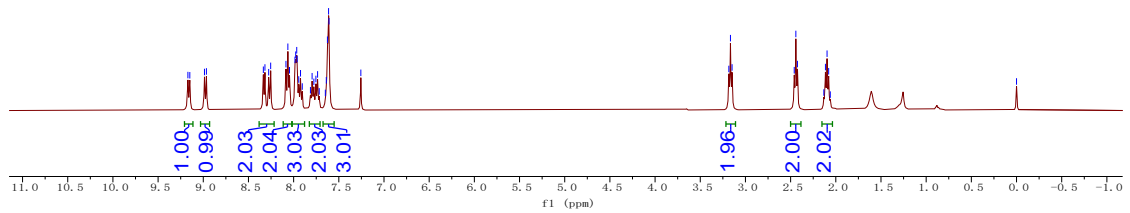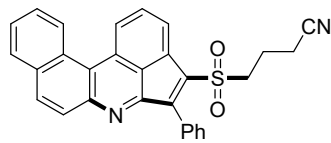

3wa

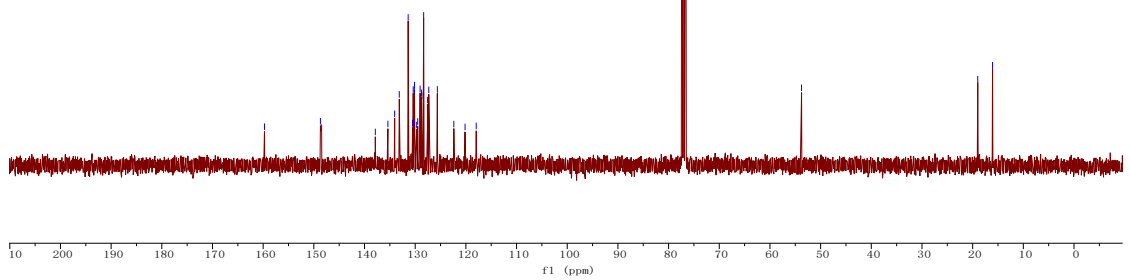



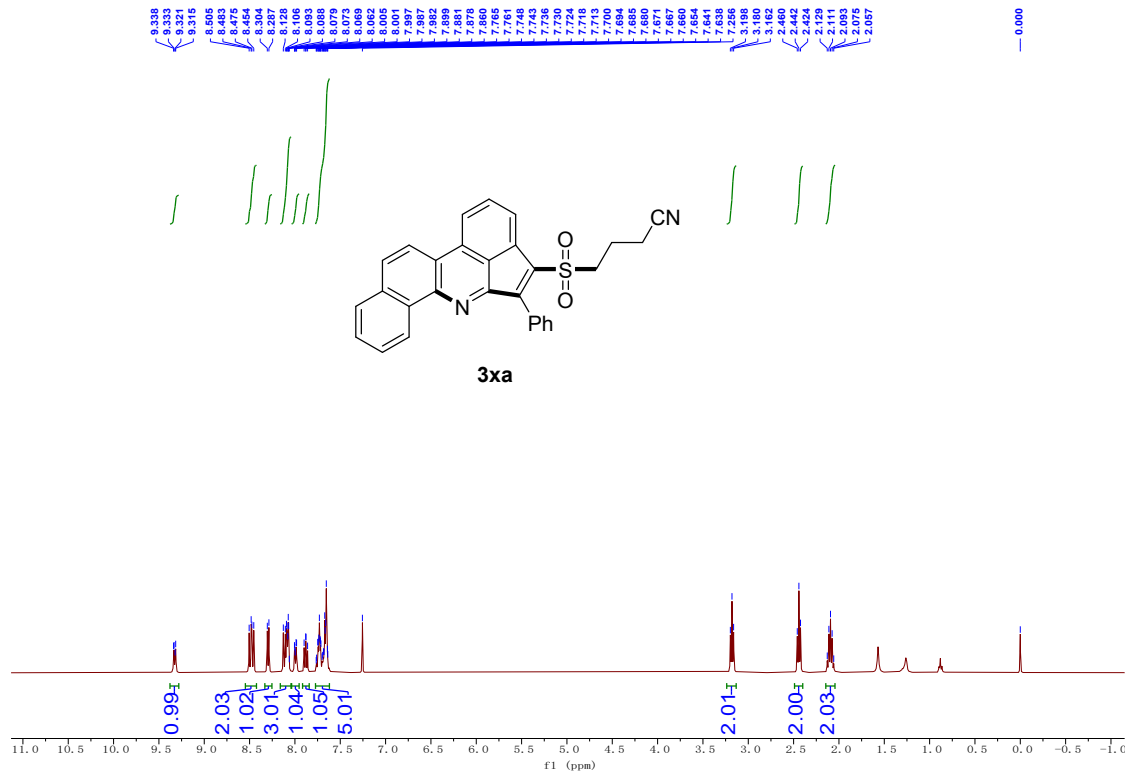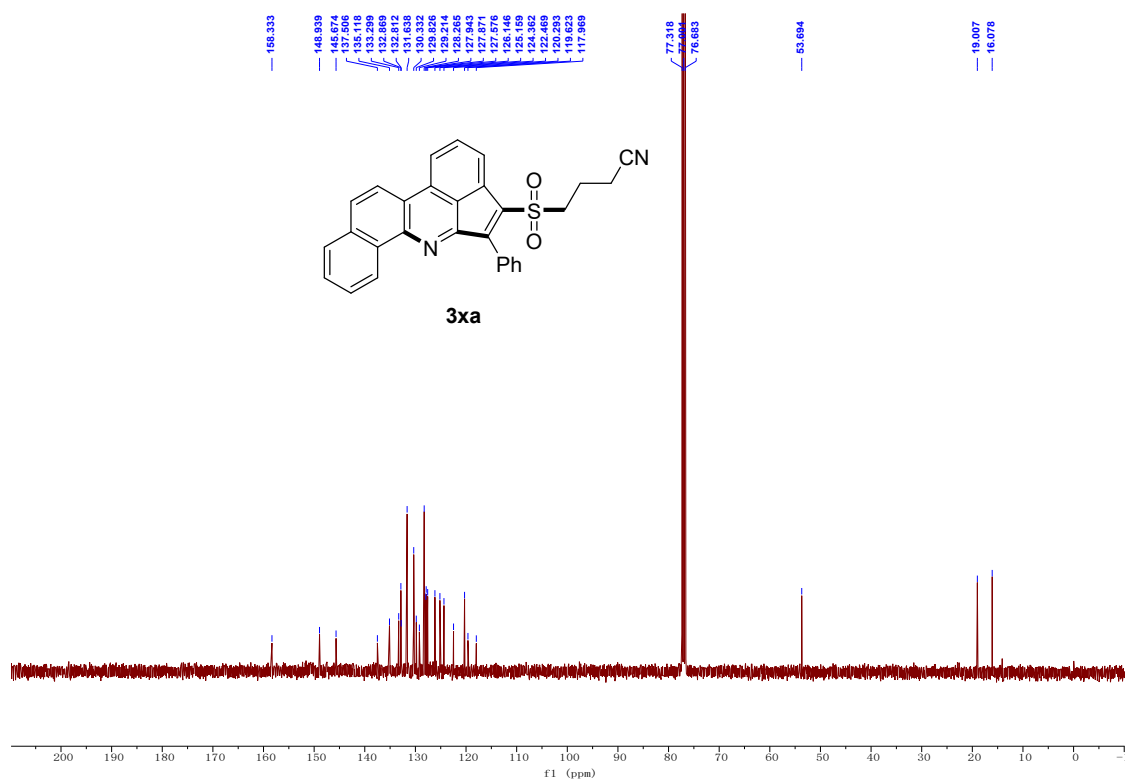

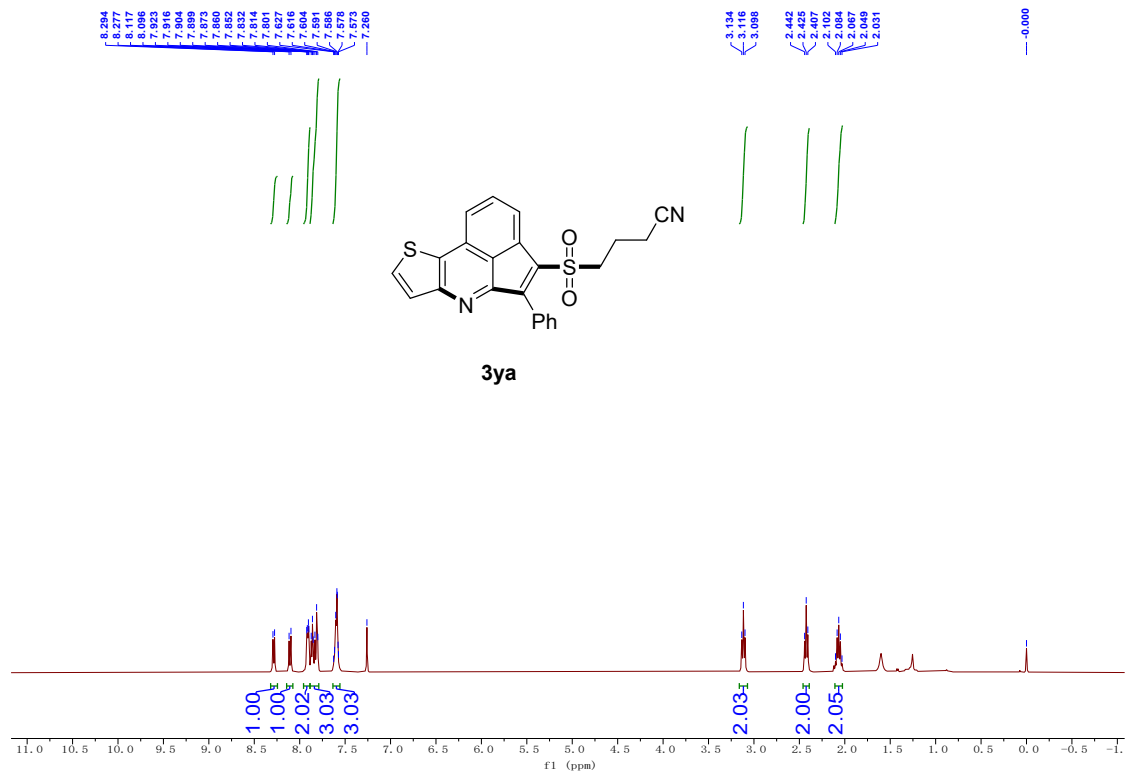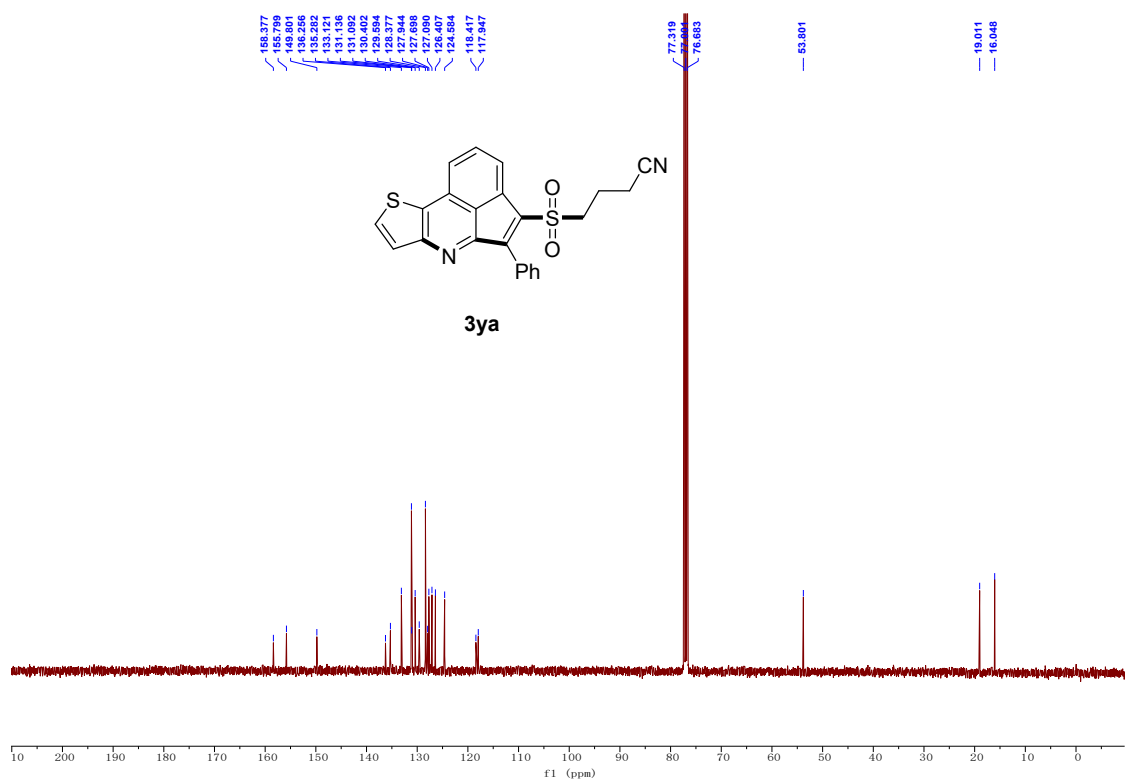

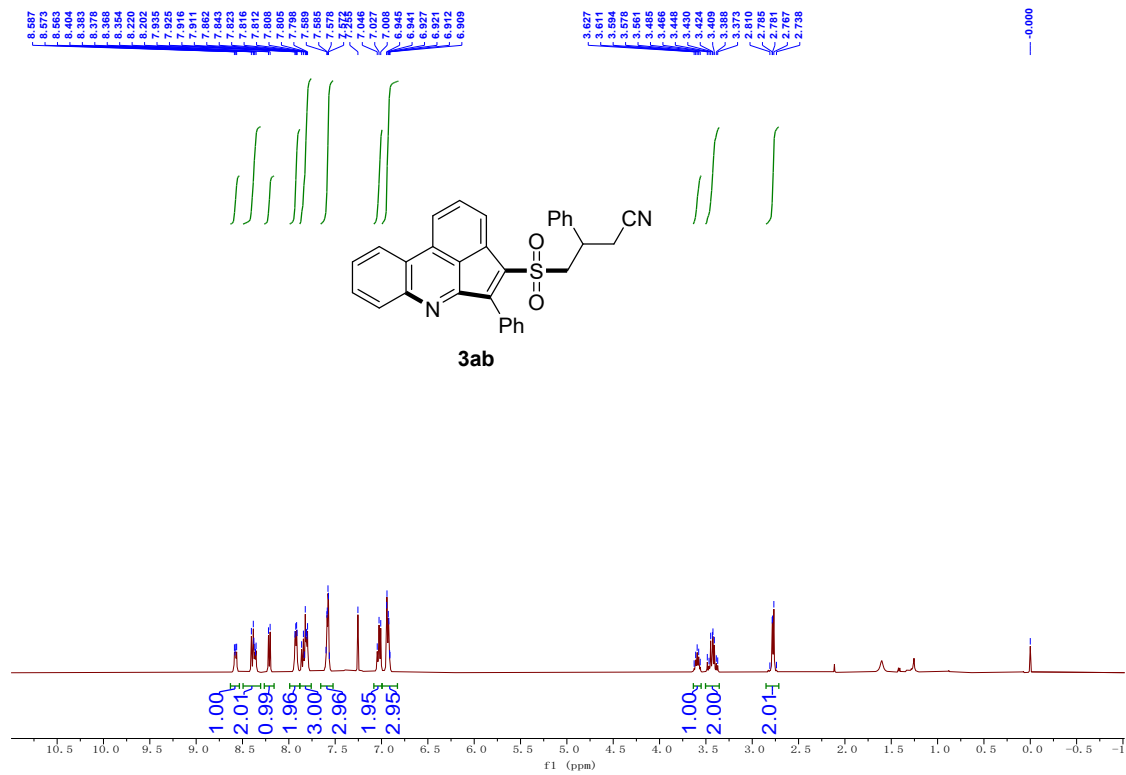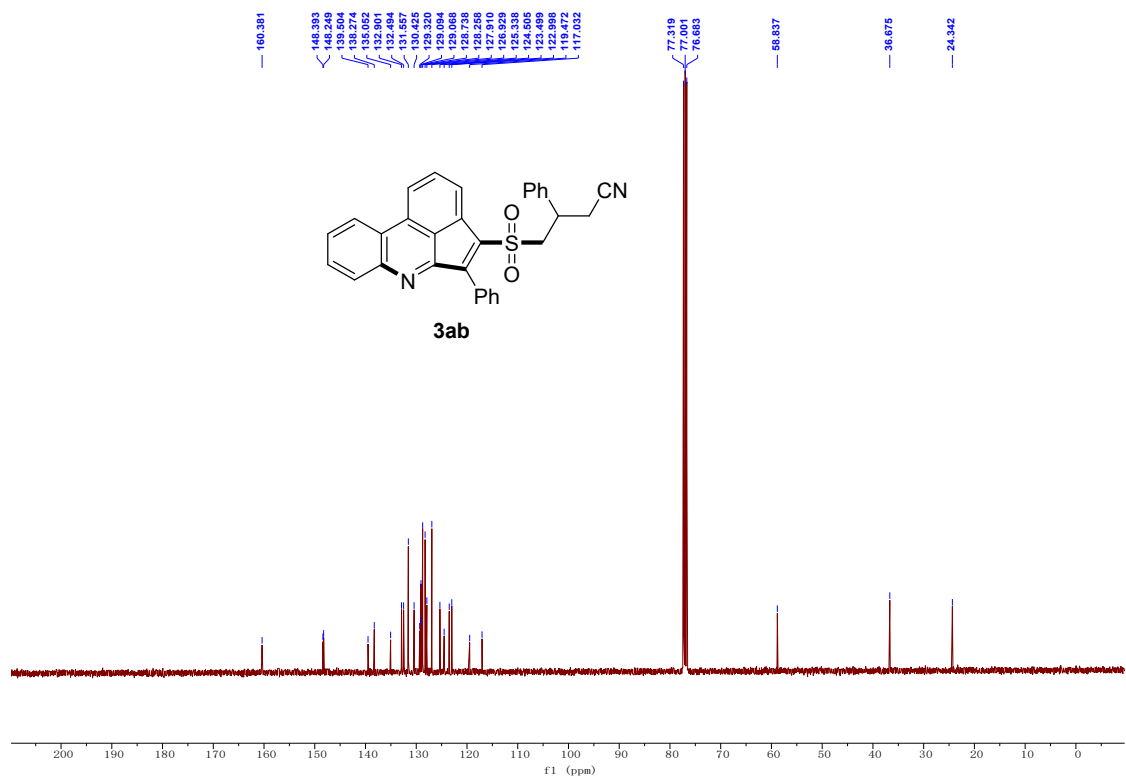

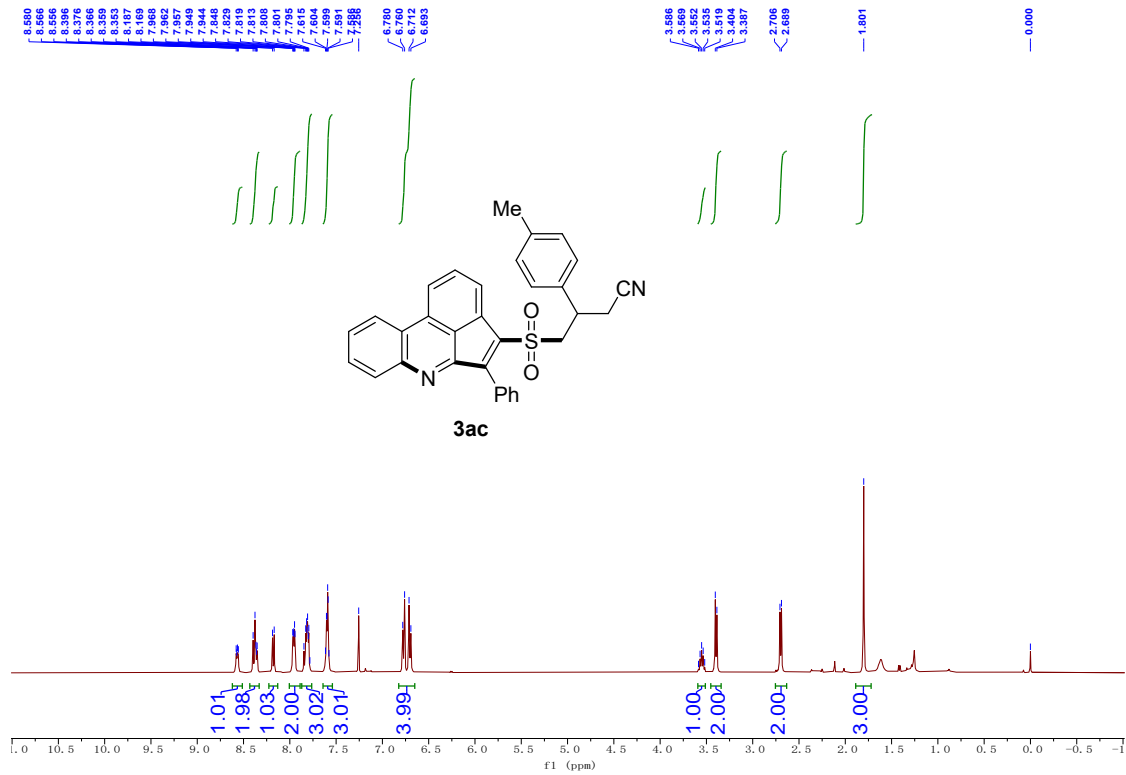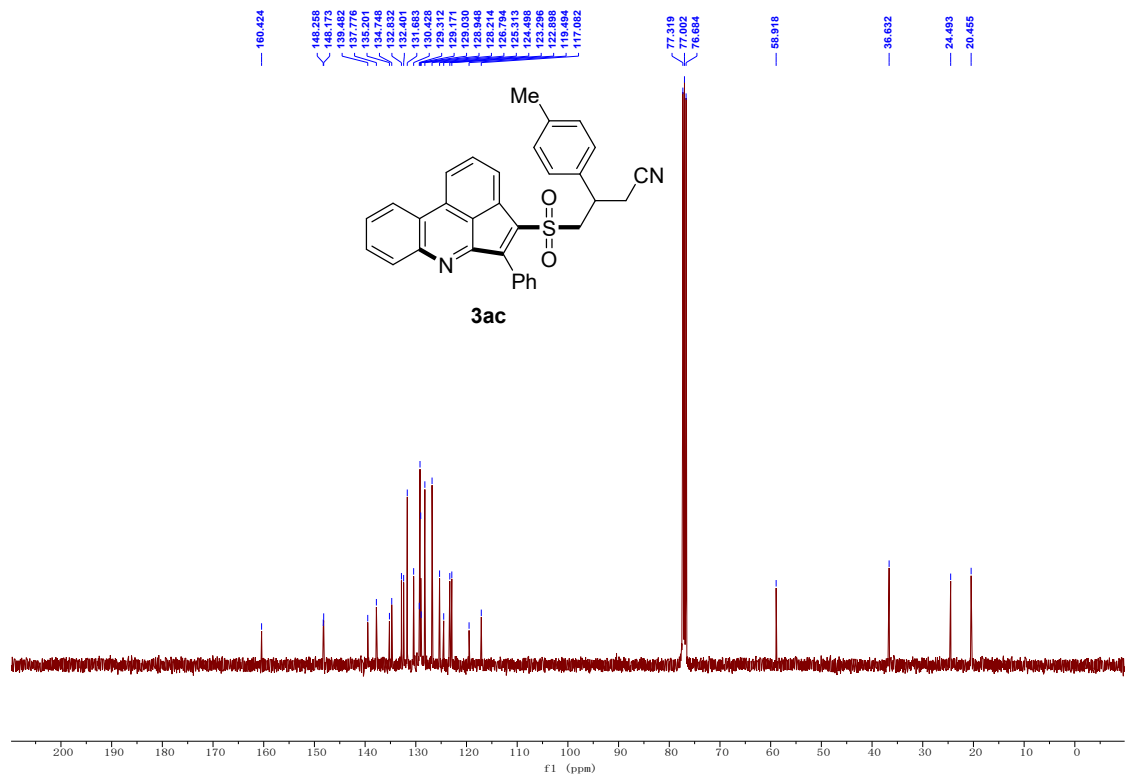

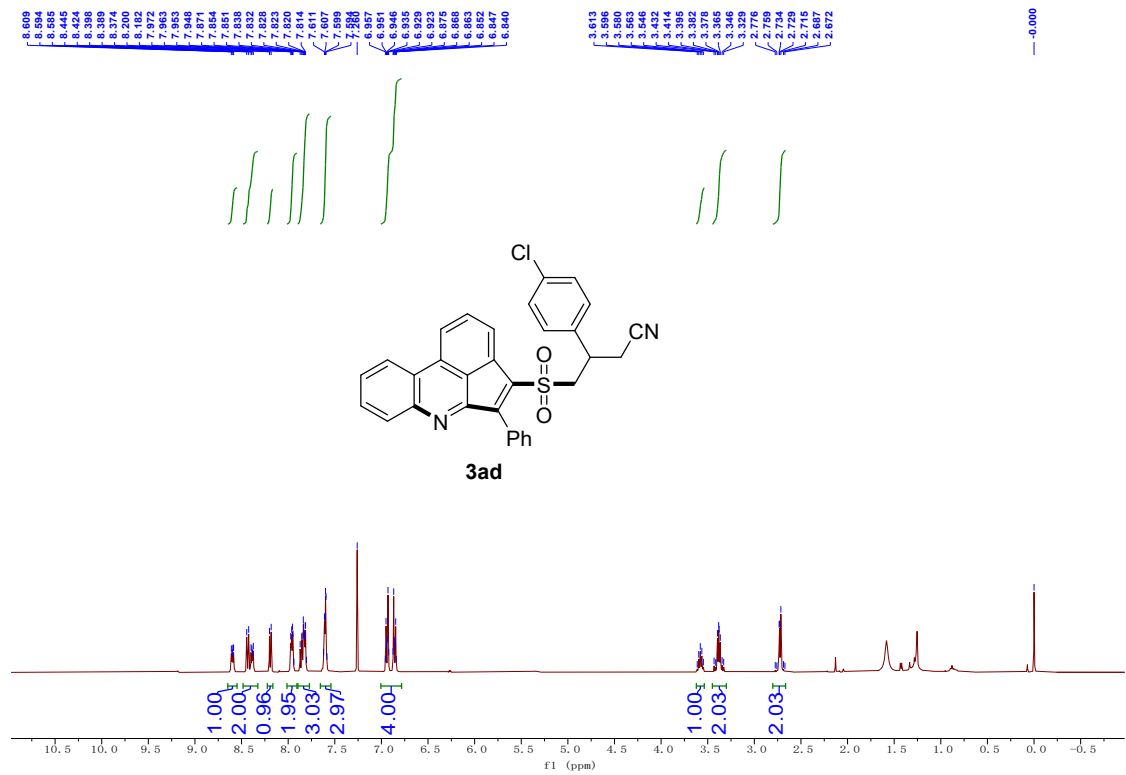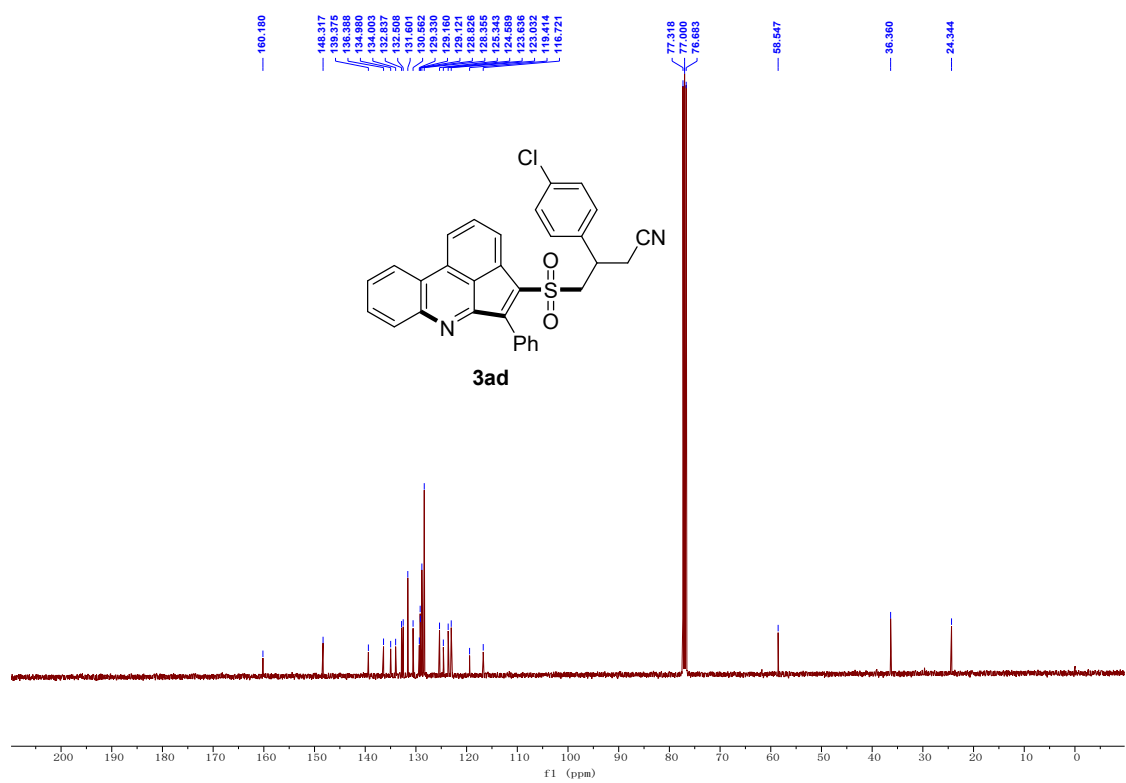

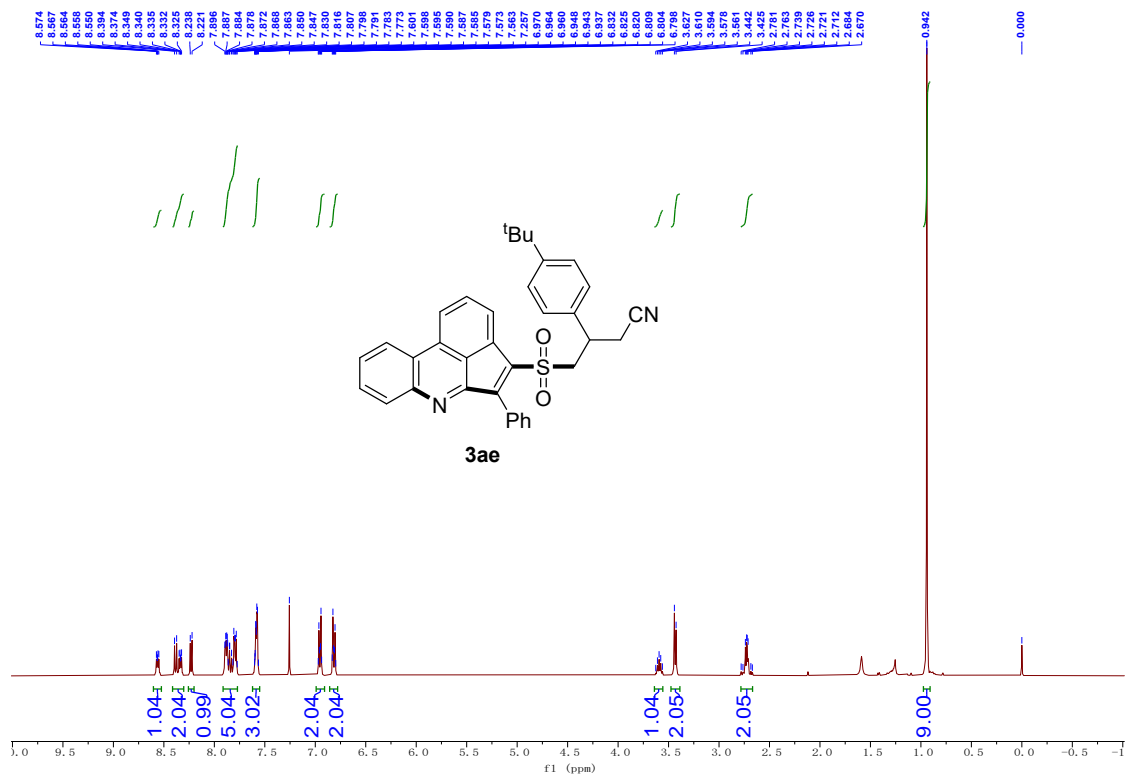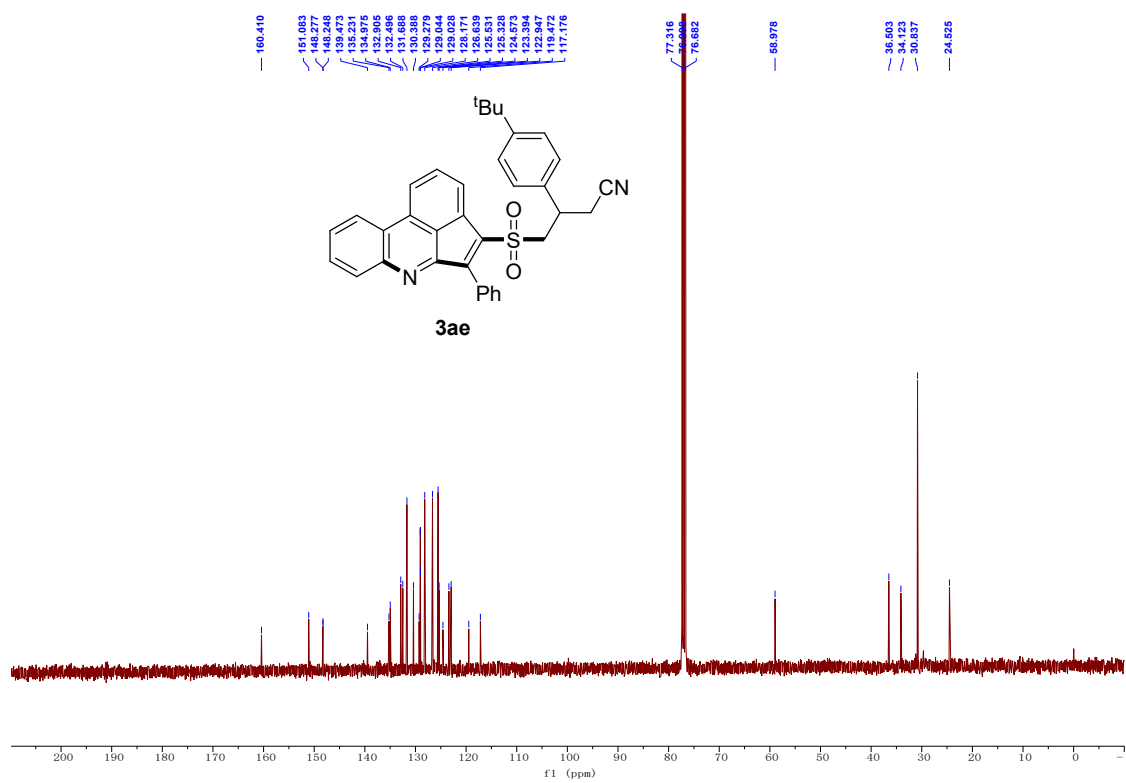

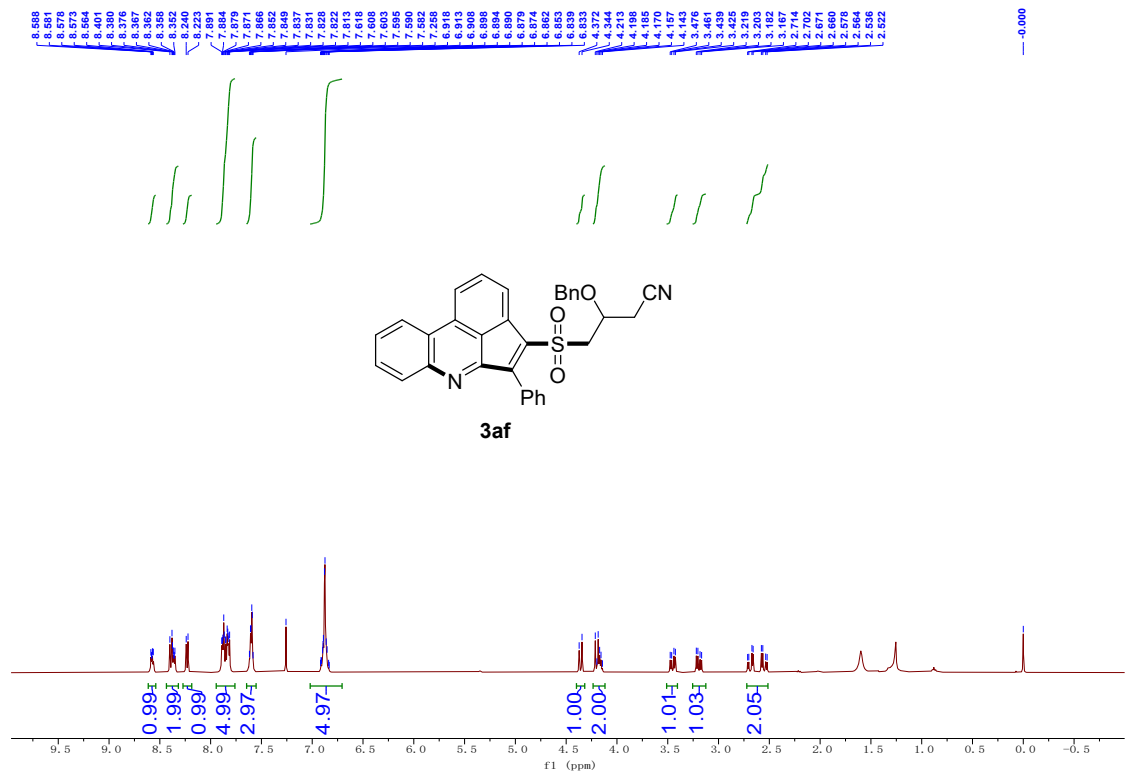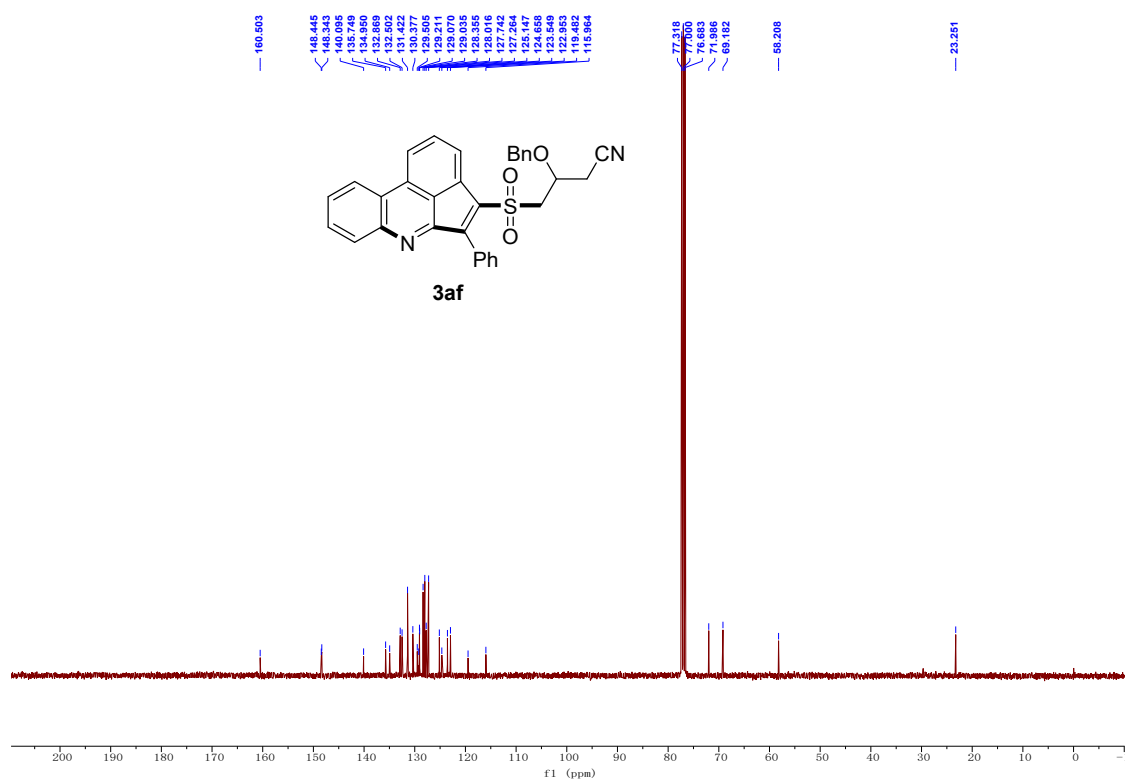

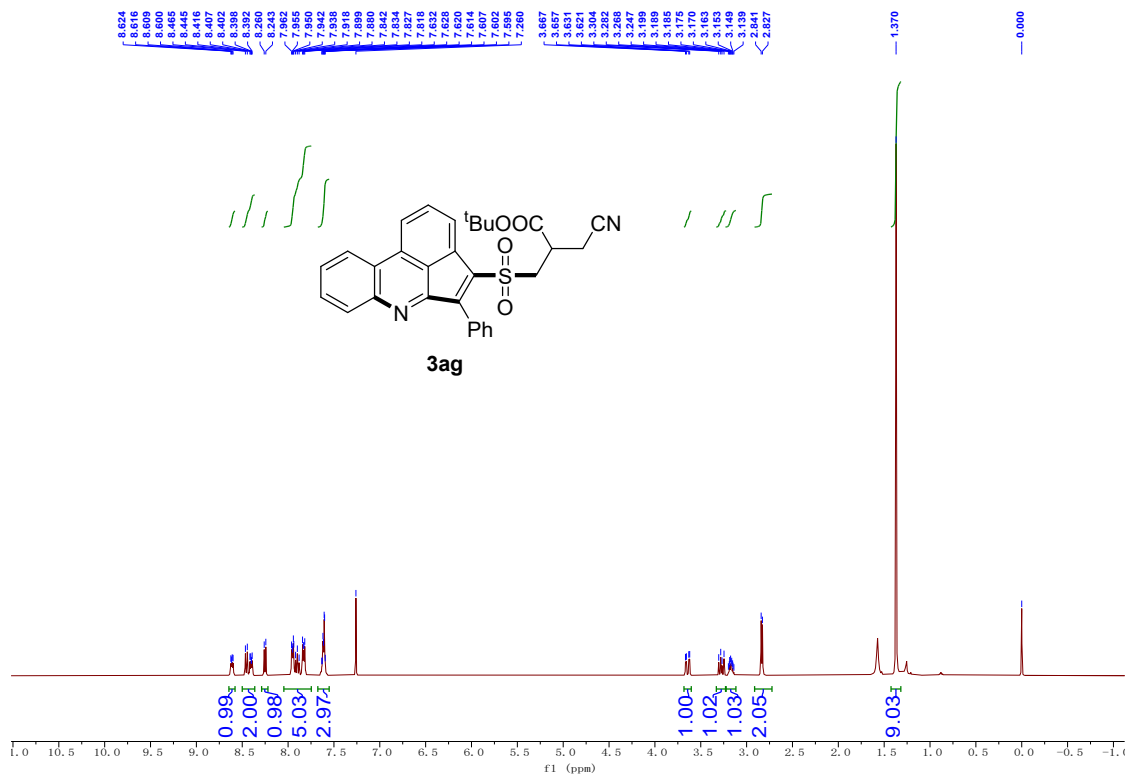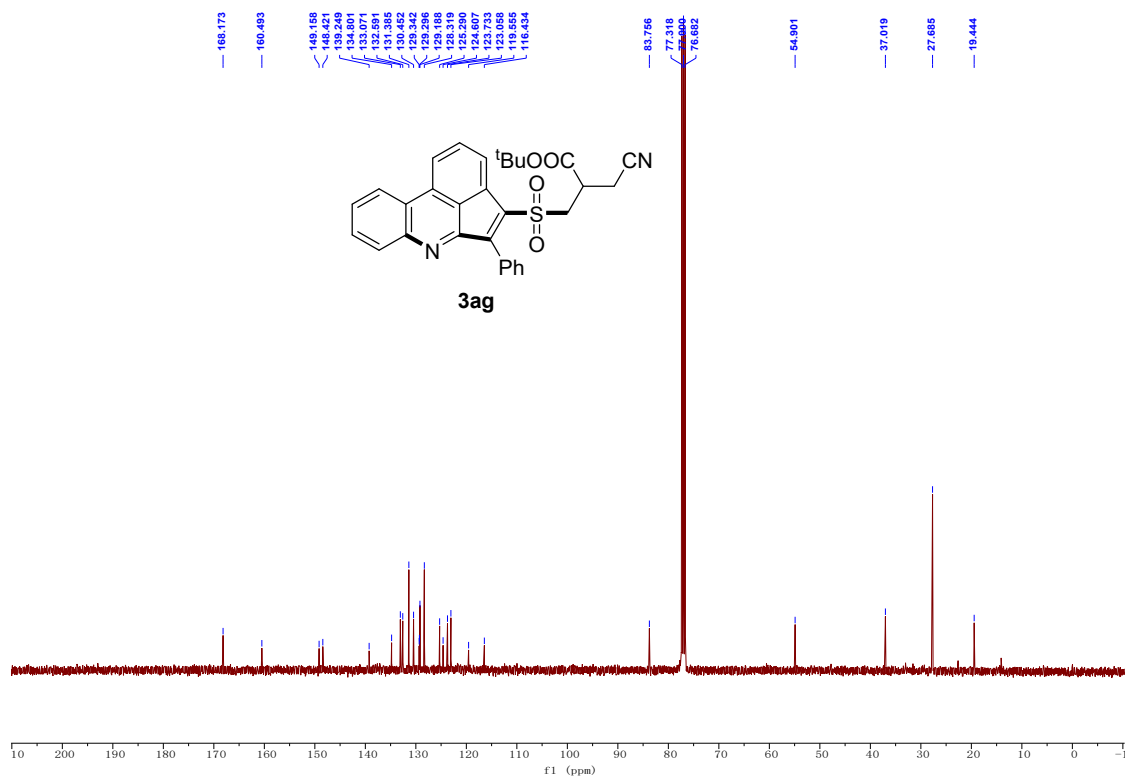



8.615  
8.609  
8.604  
8.600  
8.599  
8.451  
8.431  
8.407  
8.399  
8.389  
8.383  
8.330  
8.312  
8.294  
8.041  
8.035  
8.027  
8.012  
7.995  
7.895  
7.874  
7.836  
7.829  
7.825  
7.821  
7.811  
7.801  
7.685  
7.665  
7.646  
7.644  
7.636  
7.636  
7.257  
7.102  
7.098  
7.084  
7.077  
7.066  
7.062  
7.037  
7.034  
7.025  
7.019  
6.800  
6.800  
6.796  
6.783  
6.780  
3.289  
3.279  
3.273  
3.264  
3.264  
3.244  
3.232  
3.208  
3.208  
2.853  
2.853  
2.644  
2.644  
2.391  
2.391  
2.375  
2.370  
2.283  
2.283  
2.247  
2.247  
2.217  
2.217  
1.898  
1.889  
1.878  
1.869  
1.860  
1.850  
1.841  
1.831  
1.831  
0.000

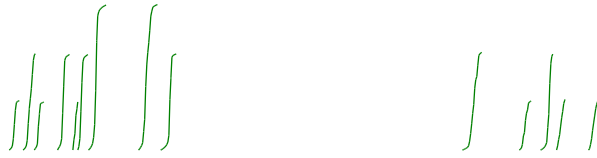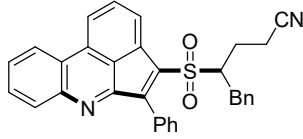

**3ai**

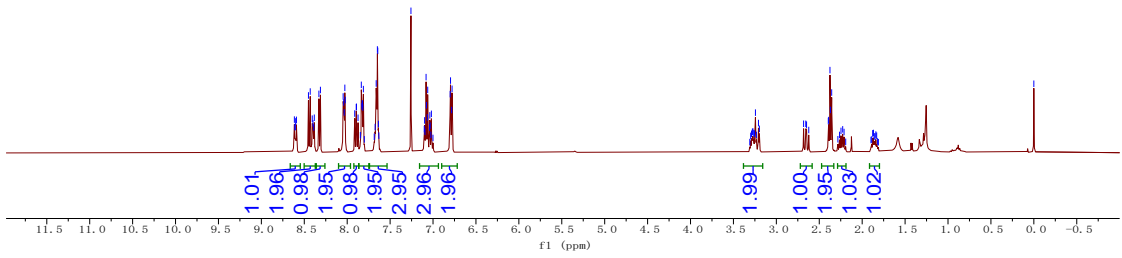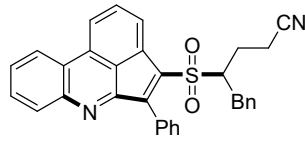

**3ai**

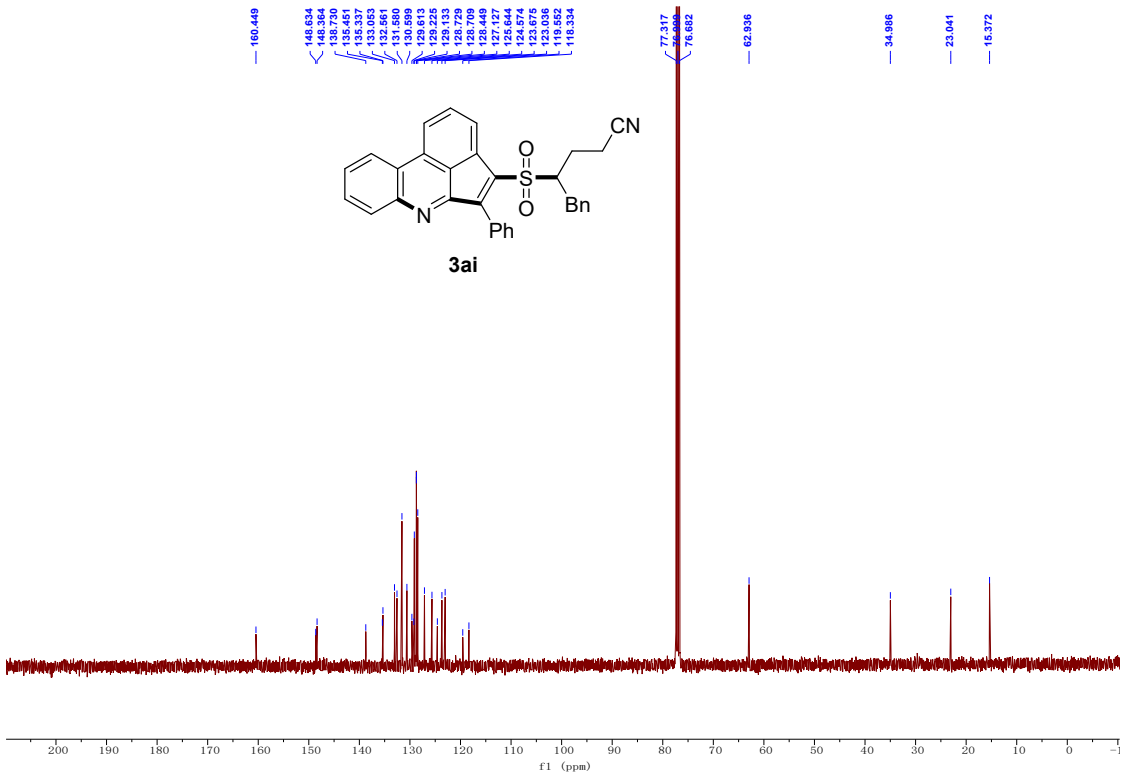

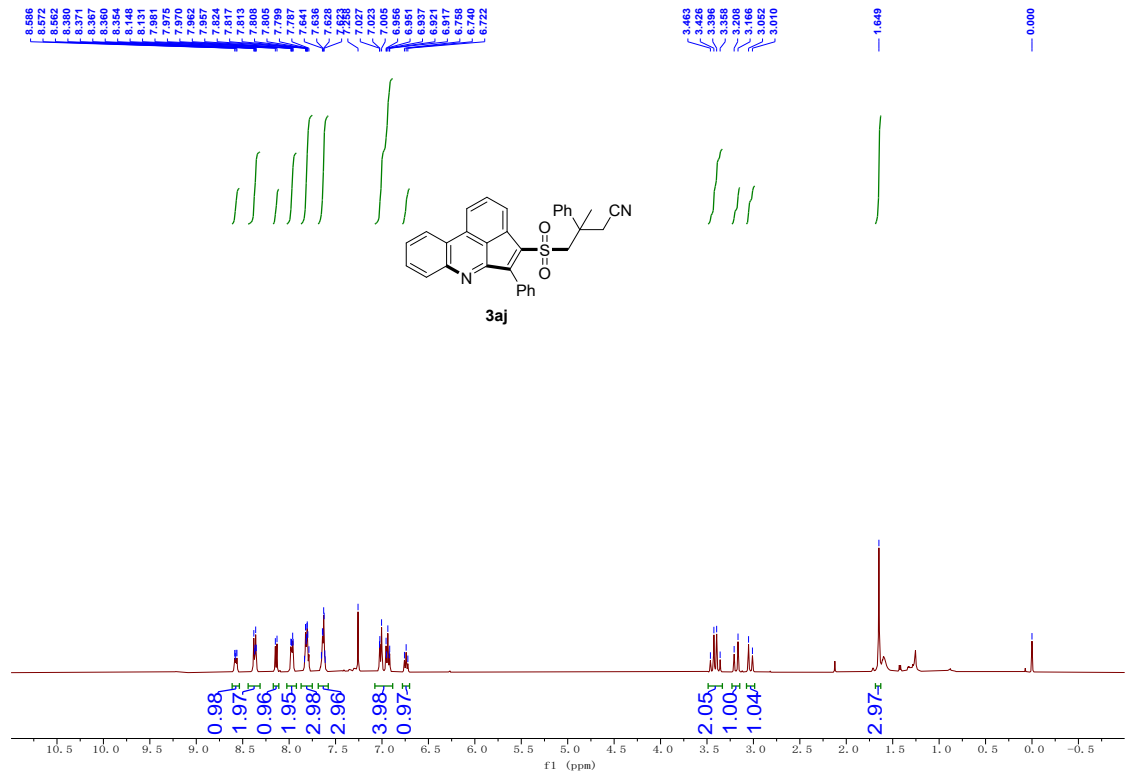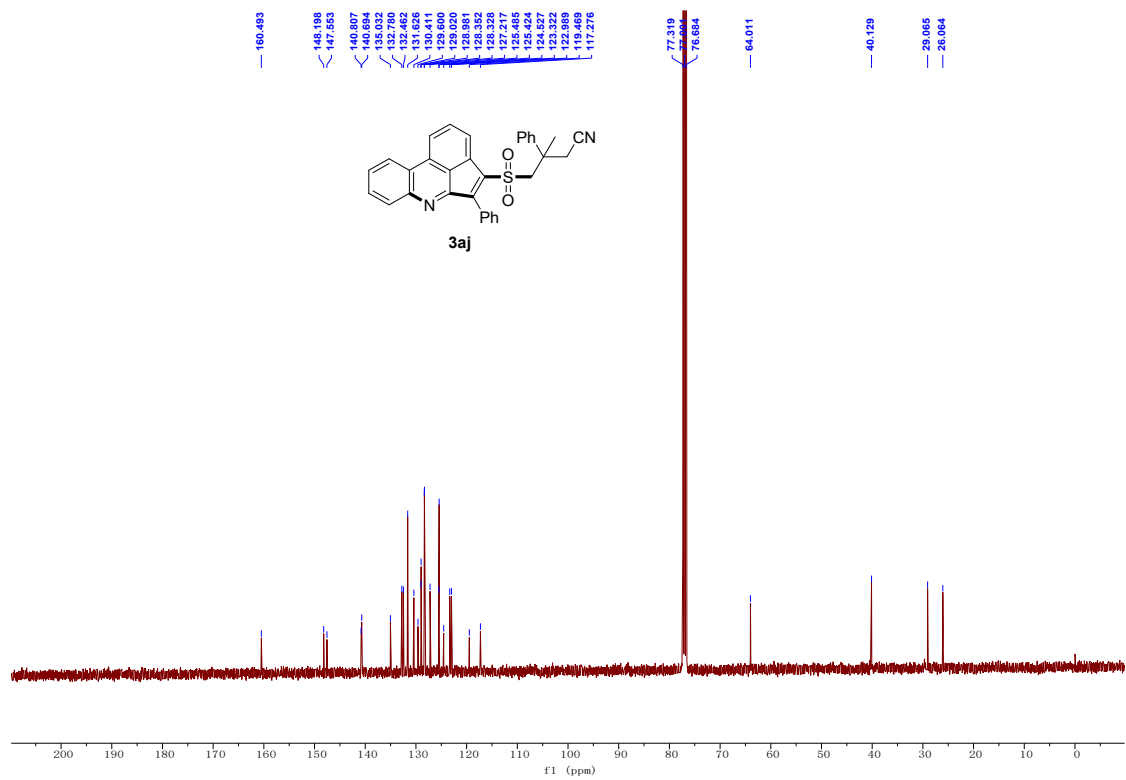

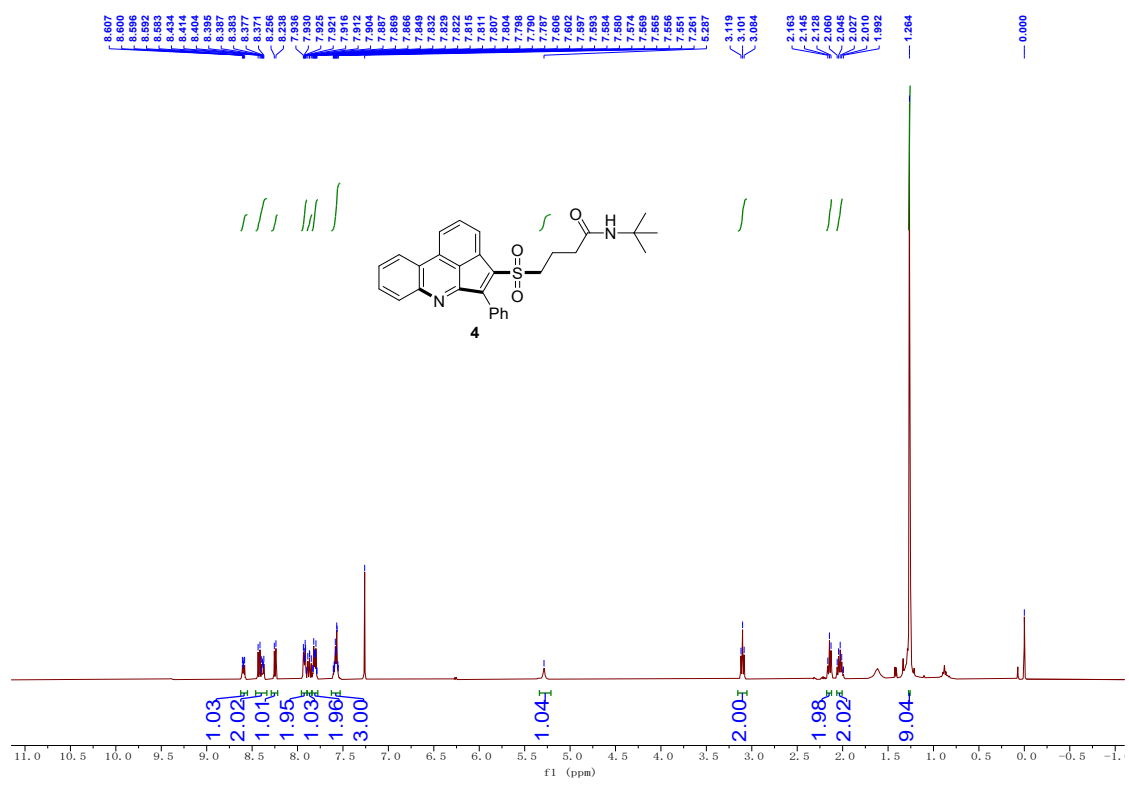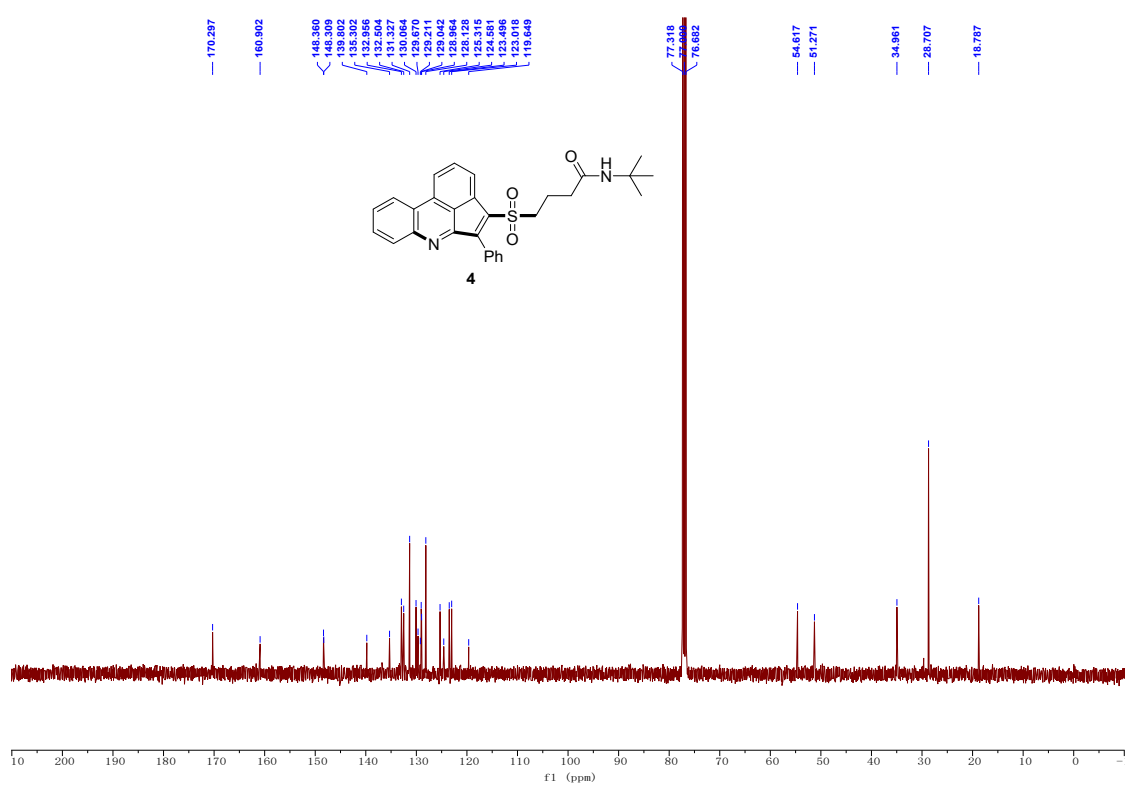

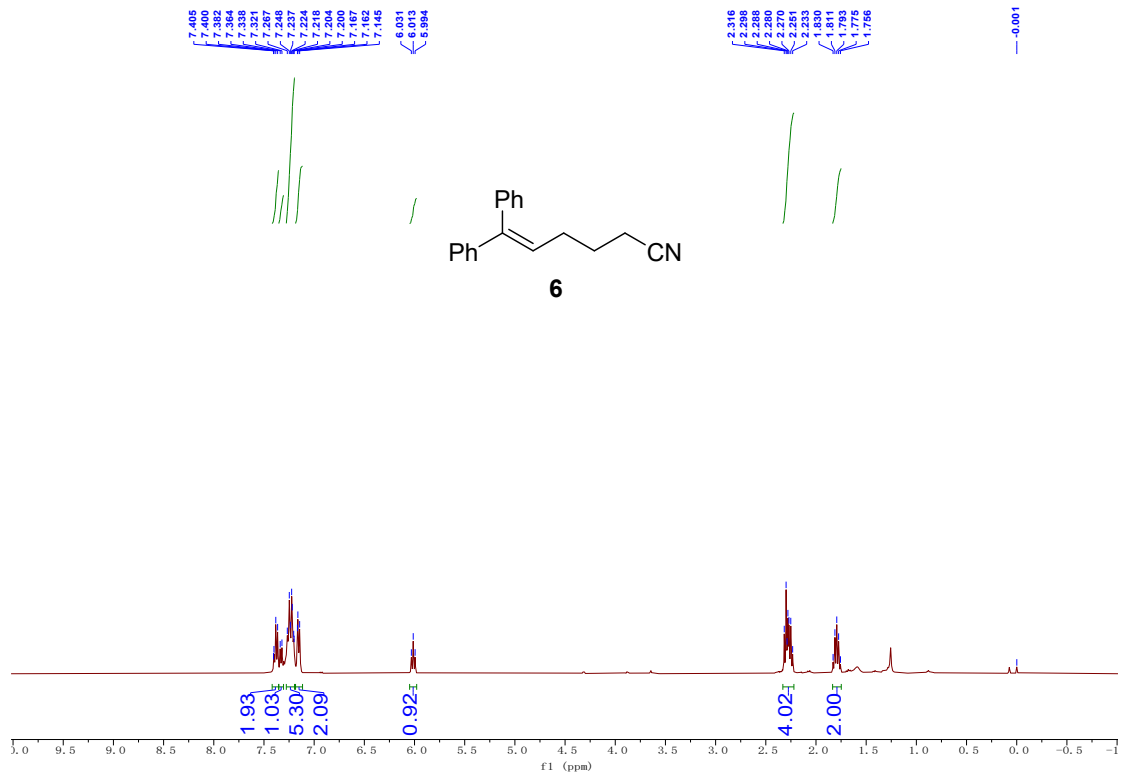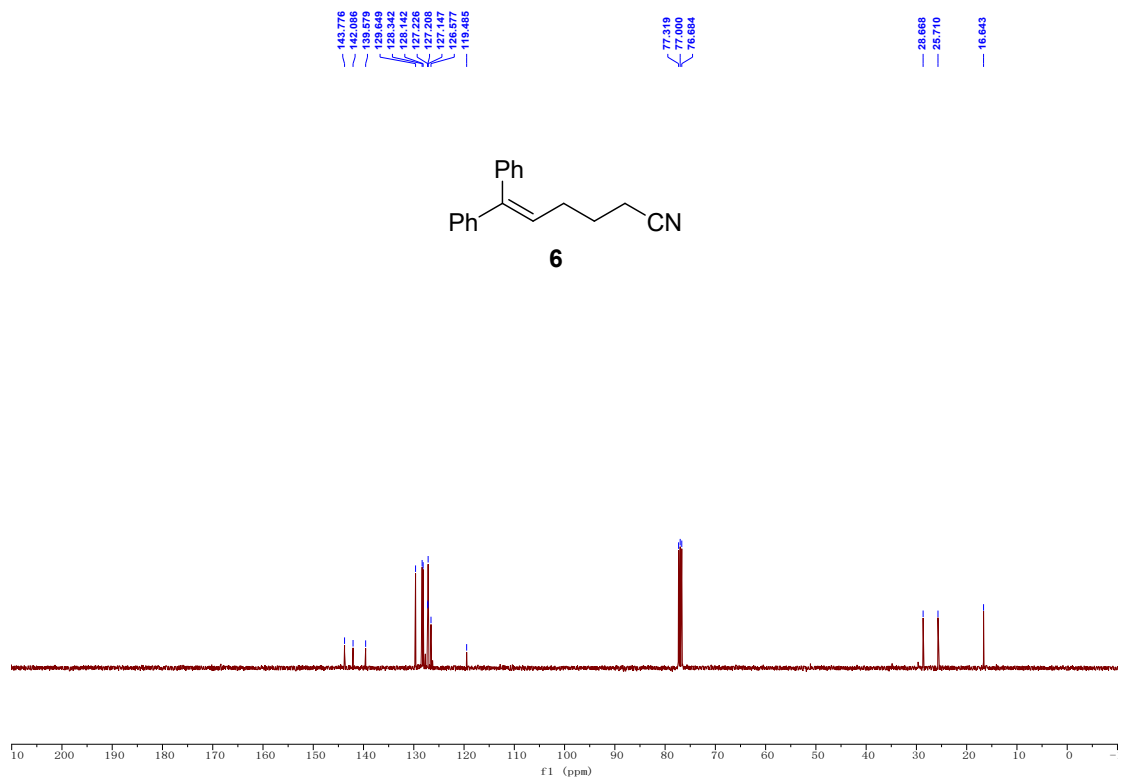

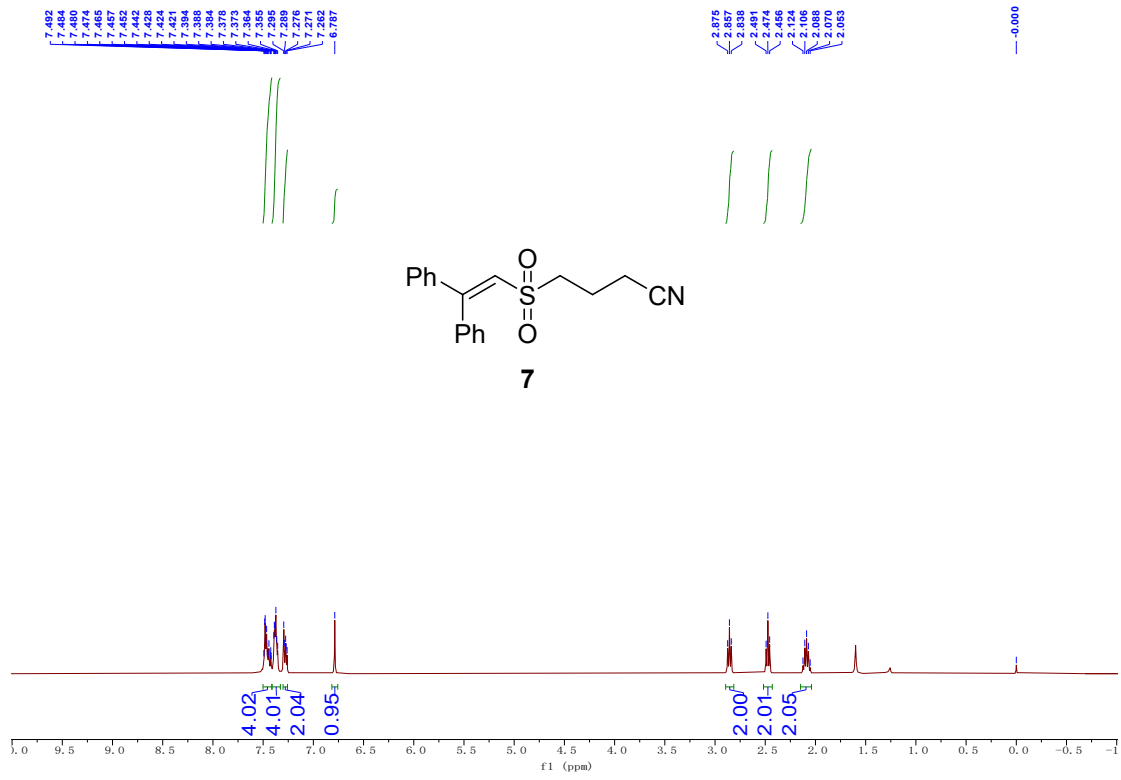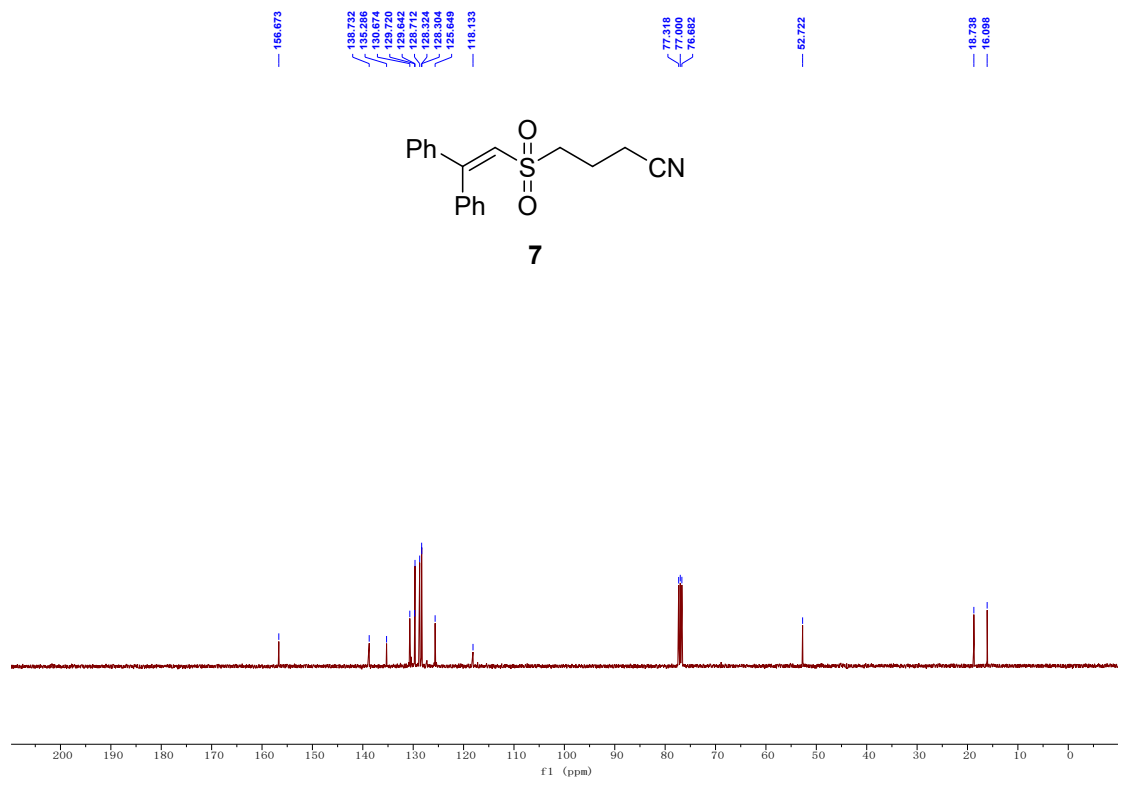

Supplement: d1cc06825c1.pdf [file d1cc06825c1.pdf]
